# Supplementary material
Source: publisher site journal article supplement (https://www.spandidos-publications.com/4438/downloadSupplementary)
Supplement: Supplementary file 1 [file downloadSupplementary]

## Sheet: GSE40275.diffSig
Table SIV. A total of 2189 differential expression genes identified from the GSE40275 dataset
Symbol	logFC	AveExpr	t	P.Value	adj.P.Val	B
CLIC5	-4.26194	7.74799	-40.637	3.04006e-48	3.3237e-44	99.6866
ANKRD29	-2.88245	5.97161	-37.6124	3.9602e-46	1.97985e-42	94.914
CLDN18	-4.67825	8.30195	-37.4234	5.43269e-46	1.97985e-42	94.6034
FBLN5	-3.84298	7.73749	-36.8791	1.36094e-45	3.71978e-42	93.7005
ANXA3	-3.80771	6.58489	-33.9137	2.54351e-43	5.56165e-40	88.5443
SLIT3	-2.88751	7.14088	-32.9449	1.53554e-42	2.79801e-39	86.767
FGD5	-2.30103	5.81215	-32.6773	2.54418e-42	3.97365e-39	86.2674
GPX3	-3.85604	8.424	-32.5208	3.42372e-42	4.67894e-39	85.9735
CDC6	3.47286	4.59261	32.3524	4.71961e-42	5.73327e-39	85.6558
PAPSS2	-3.22518	7.54472	-31.9248	1.07337e-41	1.07498e-38	84.8421
HELLS	3.69293	4.64184	31.9209	1.08157e-41	1.07498e-38	84.8346
SHROOM4	-2.53498	6.09234	-31.651	1.82615e-41	1.5615e-38	84.3156
CCNB1	3.82939	5.84	31.6425	1.85672e-41	1.5615e-38	84.2992
AGER	-5.00692	9.2634	-30.9932	6.65435e-41	5.19657e-38	83.0337
PEBP4	-3.64753	6.79231	-30.9247	7.62297e-41	5.55613e-38	82.899
C9orf61	-3.09778	6.48014	-30.6376	1.352e-40	9.23836e-38	82.3305
GPRC5A	-4.40576	7.81051	-30.5445	1.62976e-40	9.90523e-38	82.1451
ADH1B	-4.66931	7.52429	-30.5272	1.68748e-40	9.90523e-38	82.1106
EZH2	3.64593	6.11803	30.5173	1.72139e-40	9.90523e-38	82.0908
GPR116	-3.73959	8.69489	-30.4464	1.98536e-40	1.0853e-37	81.9493
HNRPR	1.54568	8.85595	29.8094	7.25135e-40	3.77519e-37	80.6632
FCN3	-4.3598	7.74448	-29.742	8.32794e-40	4.13861e-37	80.5257
HOP	-2.45845	6.73115	-29.6366	1.03474e-39	4.91864e-37	80.31
CD93	-3.03322	7.9452	-29.3132	2.02274e-39	9.21443e-37	79.6439
FIGF	-4.48158	6.38699	-29.1515	2.83438e-39	1.23953e-36	79.3086
ACVRL1	-2.75257	6.85684	-28.8041	5.88531e-39	2.47477e-36	78.5822
FOLR1	-3.44359	7.7245	-28.7559	6.51724e-39	2.639e-36	78.4808
AOC3	-4.09585	7.07474	-28.7195	7.03883e-39	2.74841e-36	78.4042
ADAMTSL3	-2.23899	5.57337	-28.6872	7.53744e-39	2.84162e-36	78.3362
RFC4	2.89522	5.83204	28.5716	9.6357e-39	3.51157e-36	78.0919
BRIP1	3.12589	4.68649	28.5505	1.00797e-38	3.55489e-36	78.0471
FIGNL1	2.33639	5.07687	28.4657	1.20777e-38	4.12641e-36	77.8672
CDH5	-3.17272	7.44765	-28.1858	2.2008e-38	7.29133e-36	77.2702
GIMAP8	-2.23248	6.44474	-28.1669	2.29243e-38	7.37153e-36	77.2296
PDZD2	-2.15609	5.99449	-27.9218	3.89417e-38	1.21643e-35	76.7022
CCNB2	3.88972	5.12116	27.7406	5.77696e-38	1.74875e-35	76.3096
CDGAP	-3.02574	7.18921	-27.7296	5.91822e-38	1.74875e-35	76.2855
RACGAP1	2.74836	6.4447	27.6116	7.65935e-38	2.20368e-35	76.0288
PTPRB	-3.65894	7.49732	-27.599	7.87474e-38	2.20755e-35	76.0011
NUF2	4.29339	4.70946	27.4593	1.07034e-37	2.92551e-35	75.6955
VEPH1	-2.83371	5.28835	-27.4161	1.17721e-37	3.13912e-35	75.6007
CHEK1	3.39464	5.05608	27.3028	1.51179e-37	3.93534e-35	75.3516
ASPM	3.62196	4.3655	27.2871	1.56521e-37	3.97964e-35	75.317
CENPI	3.37849	4.4398	27.1821	1.97532e-37	4.90822e-35	75.0852
GPR133	-2.67059	6.75448	-26.8804	3.87174e-37	9.4066e-35	74.4146
CALCRL	-3.7413	7.7457	-26.8441	4.19971e-37	9.98162e-35	74.3336
C6orf167	2.37753	4.89758	26.7219	5.5273e-37	1.28574e-34	74.0598
RBPMS	-2.79023	6.85739	-26.6319	6.77201e-37	1.54247e-34	73.8574
CDC2	3.72155	4.32593	26.414	1.1095e-36	2.47555e-34	73.3652
AGPAT5	2.43885	6.4781	26.3246	1.35994e-36	2.97364e-34	73.1623
Gcom1	-3.07844	6.19814	-26.2697	1.54152e-36	3.30459e-34	73.0373
AQP1	-3.8119	9.01325	-26.2549	1.59475e-36	3.34096e-34	73.0034
PBK	3.78542	3.95786	26.2481	1.6196e-36	3.34096e-34	72.988
PGC	-4.39579	8.62284	-26.2214	1.72146e-36	3.46453e-34	72.9272
CENPF	3.85829	5.07024	26.216	1.74288e-36	3.46453e-34	72.9149
PRC1	3.85912	5.85233	25.9267	3.38951e-36	6.61742e-34	72.2515
C4orf31	-3.73332	8.12692	-25.5726	7.71391e-36	1.47802e-33	71.431
RGC32	-3.27074	8.4864	-25.5656	7.84097e-36	1.47802e-33	71.4147
HEG1	-3.307	7.71863	-25.4877	9.40789e-36	1.73434e-33	71.2329
BUB1	3.05353	4.93275	25.4827	9.51801e-36	1.73434e-33	71.2213
CD55	-2.63964	8.24256	-25.4352	1.06398e-35	1.90696e-33	71.1101
SLC39A8	-3.74161	8.8492	-25.378	1.21704e-35	2.14611e-33	70.9759
FAM65A	-1.61698	6.54572	-25.2963	1.4749e-35	2.55953e-33	70.7841
AHNAK	-2.59658	8.89952	-25.1737	1.97005e-35	3.3654e-33	70.4952
SLC6A4	-4.45686	6.95628	-25.1611	2.02992e-35	3.41433e-33	70.4653
ALPL	-3.04451	7.02237	-25.0625	2.56414e-35	4.24754e-33	70.232
RFC5	2.28701	5.48607	25.0524	2.62662e-35	4.28609e-33	70.208
SNHG1	2.60787	6.36197	24.9046	3.73426e-35	6.00391e-33	69.8567
PPAT	2.29339	4.87207	24.7793	5.03847e-35	7.98341e-33	69.5576
C1orf116	-2.73462	6.55461	-24.6885	6.26554e-35	9.78588e-33	69.3399
EXO1	3.382	4.82582	24.564	8.45565e-35	1.30205e-32	69.0405
ZWINT	2.29725	5.45623	24.5122	9.5835e-35	1.45523e-32	68.9154
CENPK	2.96904	4.1822	24.4191	1.20076e-34	1.79834e-32	68.6901
CDC20	3.37251	5.77451	24.246	1.82881e-34	2.70194e-32	68.2698
POLA1	2.37203	6.1776	24.186	2.11736e-34	3.08654e-32	68.1234
ADH1A	-1.97498	5.10125	-24.144	2.34673e-34	3.3759e-32	68.0206
CEP78	1.97023	5.62459	24.121	2.48252e-34	3.52485e-32	67.9644
PID1	-1.75178	5.75858	-24.0636	2.85776e-34	4.00563e-32	67.8238
AKAP13	-1.67183	8.22174	-24.0347	3.06798e-34	4.24585e-32	67.7528
RBMS3	-2.51165	6.46343	-24.0145	3.22384e-34	4.40578e-32	67.7033
CD302	-2.45171	7.45501	-23.9935	3.39439e-34	4.58159e-32	67.6518
CLEC1A	-1.83768	5.37713	-23.9726	3.57354e-34	4.76457e-32	67.6004
ADAMTS1	-3.39918	7.31472	-23.8704	4.59732e-34	6.05573e-32	67.3486
ATAD2	2.84833	5.50969	23.8604	4.71251e-34	6.13355e-32	67.3239
ATP10A	-1.63403	5.96047	-23.7251	6.58796e-34	8.40523e-32	66.989
C4BPA	-4.58796	7.88676	-23.7236	6.61163e-34	8.40523e-32	66.9854
CDCA8	2.2101	4.89004	23.6884	7.21585e-34	9.06792e-32	66.898
CAT	-2.16503	8.31897	-23.5412	1.04119e-33	1.29356e-31	66.5314
ABI3BP	-3.38387	6.91701	-23.5197	1.09865e-33	1.34961e-31	66.4777
ADH1C	-1.72471	4.94282	-23.4965	1.16419e-33	1.41423e-31	66.4198
C19orf59	-3.76704	7.31907	-23.3763	1.5734e-33	1.89032e-31	66.1186
ATP13A4	-3.08637	6.43374	-23.2209	2.32663e-33	2.7649e-31	65.7274
PTBP2	1.95504	7.04871	23.1786	2.58874e-33	3.0433e-31	65.6206
PCDH12	-1.55523	5.64195	-23.1515	2.77243e-33	3.22457e-31	65.5521
SH3PX3	-1.79486	5.92759	-23.0669	3.43517e-33	3.95333e-31	65.3377
AK1	-1.65447	7.50677	-23.0587	3.50768e-33	3.99473e-31	65.3168
GPR126	-2.60134	5.93104	-23.0156	3.91325e-33	4.41067e-31	65.2074
CLEC14A	-2.28287	6.89696	-22.9815	4.26759e-33	4.76098e-31	65.1207
PROS1	-2.40985	7.88859	-22.9454	4.67811e-33	5.16624e-31	65.0288
BUB1B	3.23293	4.4261	22.8832	5.48298e-33	5.99454e-31	64.87
PFN2	2.71802	6.6366	22.8345	6.21003e-33	6.7222e-31	64.7454
ALDH3B1	-1.68825	7.40511	-22.8258	6.34914e-33	6.80541e-31	64.7233
AQP3	-2.99719	7.87008	-22.6775	9.28698e-33	9.85772e-31	64.3428
NUSAP1	3.82355	5.30009	22.6677	9.52509e-33	1.00133e-30	64.3175
WFDC1	-1.85878	6.31966	-22.6491	9.99207e-33	1.04041e-30	64.2696
CD44	-2.69978	8.86419	-22.6285	1.05347e-32	1.08656e-30	64.2167
CENPL	2.01707	4.95883	22.6063	1.11559e-32	1.13988e-30	64.1593
ACBD6	1.24641	5.66523	22.5547	1.27452e-32	1.29022e-30	64.0261
C3orf14	2.94736	4.276	22.2396	2.88739e-32	2.89613e-30	63.2077
BRCA1	1.92613	4.64446	22.2271	2.9838e-32	2.95957e-30	63.1748
CCNA2	2.86931	5.70307	22.2244	3.00478e-32	2.95957e-30	63.1678
ALDH2	-2.7735	8.80681	-22.2083	3.13364e-32	3.04694e-30	63.1257
ACTL6A	2.21186	6.43157	22.2055	3.15662e-32	3.04694e-30	63.1184
CENTD3	-1.61971	6.17411	-22.203	3.17709e-32	3.04694e-30	63.112
PTTG1	3.0699	6.2411	22.11	4.05364e-32	3.85378e-30	62.8681
CAST	-1.56972	7.92633	-22.0731	4.46538e-32	4.20046e-30	62.7712
PRIM1	2.43217	6.04595	22.0706	4.49514e-32	4.20046e-30	62.7646
SLC22A3	-2.24721	6.2013	-22.0464	4.78996e-32	4.42918e-30	62.701
WIF1	-4.12131	6.97868	-22.0439	4.82093e-32	4.42918e-30	62.6946
CD97	-3.06972	7.82266	-22.0402	4.86824e-32	4.43537e-30	62.6848
PRPF39	1.48271	6.15358	22.0359	4.92359e-32	4.43752e-30	62.6735
CCDC34	1.5156	4.65798	22.0337	4.95177e-32	4.43752e-30	62.6677
WDHD1	2.7264	4.91153	22.0228	5.0962e-32	4.52982e-30	62.639
RBMS2	-1.94508	7.00794	-22.0174	5.16963e-32	4.55803e-30	62.6246
CA2	-2.30303	6.3131	-21.9825	5.66634e-32	4.95601e-30	62.5328
PLLP	-2.40757	7.36567	-21.9776	5.73959e-32	4.98023e-30	62.5199
CBFA2T2	2.01615	6.51965	21.9484	6.19974e-32	5.33714e-30	62.4427
CKAP2	3.04127	5.90721	21.9319	6.47442e-32	5.53007e-30	62.3993
CD34	-2.44556	6.91369	-21.9131	6.80488e-32	5.76727e-30	62.3495
ABCA8	-2.61377	5.01328	-21.895	7.13789e-32	6.00296e-30	62.3017
RFWD3	1.69732	5.87604	21.8338	8.39145e-32	7.00334e-30	62.1397
ARHGAP6	-1.56707	5.15865	-21.6659	1.31054e-31	1.08153e-29	61.6933
RMI1	2.45301	4.98602	21.6644	1.31568e-31	1.08153e-29	61.6894
QKI	-2.03336	7.75108	-21.5962	1.57795e-31	1.27983e-29	61.5074
PDLIM2	-2.07	7.15829	-21.5957	1.58032e-31	1.27983e-29	61.5059
FYCO1	-1.21166	6.47084	-21.5731	1.67838e-31	1.34924e-29	61.4456
PLA2G4F	-2.46267	6.10197	-21.5618	1.72976e-31	1.3804e-29	61.4154
NTN4	-2.13778	7.28896	-21.5481	1.79424e-31	1.42113e-29	61.3787
GDAP1	2.98382	6.30107	21.5455	1.8068e-31	1.42113e-29	61.3718
GALNT5	-2.81335	5.84344	-21.5403	1.83217e-31	1.43079e-29	61.3578
UNG	1.9088	6.13716	21.4549	2.30332e-31	1.78597e-29	61.1286
ATAD5	2.43963	4.24876	21.4482	2.34479e-31	1.80532e-29	61.1107
FILIP1	-2.42545	6.20566	-21.4181	2.54204e-31	1.94351e-29	61.0298
SLC16A5	-1.62959	6.35907	-21.4012	2.66031e-31	2.0198e-29	60.9843
PALMD	-2.36241	5.76528	-21.3895	2.74572e-31	2.07027e-29	60.9526
C11orf80	1.69013	5.51731	21.3769	2.84012e-31	2.12678e-29	60.9188
PSMC3IP	1.80961	6.04561	21.3628	2.94992e-31	2.19398e-29	60.8808
ALOX15B	-1.98868	6.57814	-21.3365	3.16626e-31	2.33897e-29	60.8099
GYPC	-1.69094	6.21741	-21.3036	3.46041e-31	2.5391e-29	60.7209
PECAM1	-2.95925	9.15484	-21.2939	3.55125e-31	2.58839e-29	60.695
WDR76	2.78553	5.10374	21.2573	3.92056e-31	2.83864e-29	60.5959
RNASE1	-2.42726	10.4093	-21.2015	4.55873e-31	3.27898e-29	60.4448
CDK4	1.16701	7.71801	21.1967	4.61872e-31	3.30042e-29	60.4317
FGFR4	-2.23238	6.56125	-21.161	5.08721e-31	3.61159e-29	60.335
ABLIM3	-1.78356	6.28664	-21.1411	5.36996e-31	3.78773e-29	60.2808
FANCA	2.71763	5.50467	21.1352	5.45644e-31	3.82406e-29	60.2648
PRR6	2.63561	6.10737	21.1179	5.71873e-31	3.98235e-29	60.2177
ORC1L	1.5432	4.4716	21.1146	5.76972e-31	3.99243e-29	60.2088
VSIG2	-1.50605	6.35704	-21.0746	6.43308e-31	4.42345e-29	60.0998
PCDH1	-1.35931	6.96235	-21.0594	6.70489e-31	4.58153e-29	60.0584
ADAM22	2.41534	4.79654	21.0438	6.9955e-31	4.75042e-29	60.0159
CDC45L	2.19882	5.14014	21.0188	7.48833e-31	5.0537e-29	59.9477
ANKRD25	-1.80954	7.4012	-21.0113	7.64192e-31	5.12571e-29	59.9273
GPM6A	-2.95045	5.75482	-20.9874	8.15743e-31	5.43812e-29	59.8619
FAM111B	3.73854	4.94064	20.9481	9.0802e-31	6.01659e-29	59.7546
GINS2	2.52387	4.61952	20.9399	9.28598e-31	6.10582e-29	59.7321
SH2D4A	-1.3675	4.98271	-20.9383	9.32655e-31	6.10582e-29	59.7277
RHOBTB2	-1.8108	7.07037	-20.8434	1.20912e-30	7.86865e-29	59.4676
CHAF1B	1.97831	5.18794	20.8076	1.334e-30	8.62994e-29	59.3692
FLJ21986	-2.27749	5.7982	-20.7904	1.39843e-30	8.99352e-29	59.3219
C6orf189	-1.37899	7.06076	-20.7697	1.48017e-30	9.46356e-29	59.265
SLCO2A1	-3.35692	7.7114	-20.7514	1.55678e-30	9.89548e-29	59.2144
CLEC3B	-2.19784	6.89961	-20.7063	1.76257e-30	1.11388e-28	59.09
PRKCZ	-1.49768	7.34302	-20.659	2.00818e-30	1.2618e-28	58.9593
VGLL3	-1.98771	5.95603	-20.6438	2.09392e-30	1.29656e-28	58.9174
GGH	2.91648	5.04377	20.6437	2.09444e-30	1.29656e-28	58.9171
CFD	-2.74703	8.47608	-20.6429	2.09906e-30	1.29656e-28	58.9149
WFS1	-1.86473	6.97327	-20.6265	2.19679e-30	1.3493e-28	58.8693
ARHGAP11A	3.45404	4.89801	20.5698	2.56924e-30	1.56925e-28	58.7124
ARRB1	-2.50017	7.92392	-20.5507	2.70924e-30	1.64556e-28	58.6592
C13orf3	2.14441	3.8605	20.54	2.79007e-30	1.68529e-28	58.6298
GLMN	1.52028	4.12229	20.4795	3.30044e-30	1.98229e-28	58.4614
VIPR1	-3.09811	7.64326	-20.4776	3.31801e-30	1.98229e-28	58.4561
PARVB	-1.4157	6.28046	-20.4719	3.37035e-30	2.00261e-28	58.4404
PTRF	-2.83631	7.49337	-20.4165	3.93172e-30	2.32354e-28	58.286
CCDC21	1.76688	5.69692	20.3698	4.47853e-30	2.63246e-28	58.1555
GINS4	1.53173	4.59401	20.2686	5.94074e-30	3.47327e-28	57.8723
CCT6A	1.91017	7.37572	20.2318	6.58715e-30	3.83071e-28	57.7688
ADRB2	-2.47837	7.25527	-20.205	7.10025e-30	4.10725e-28	57.6936
PLK4	1.9215	4.05967	20.1829	7.55416e-30	4.34419e-28	57.6315
PGM2L1	1.81648	5.75844	20.1813	7.58931e-30	4.34419e-28	57.6268
PTGS1	-1.31661	5.70098	-20.153	8.21597e-30	4.6784e-28	57.5473
CCDC14	2.06482	6.02992	20.1434	8.44021e-30	4.78118e-28	57.5203
AQP4	-4.48791	7.50934	-20.1283	8.8065e-30	4.96296e-28	57.4777
PHF6	2.12939	6.25522	20.0896	9.82134e-30	5.5065e-28	57.3684
GART	1.29105	7.26746	20.076	1.02029e-29	5.68007e-28	57.3302
ACADL	-2.65021	5.27691	-20.0749	1.02348e-29	5.68007e-28	57.327
CKS2	3.02272	5.78761	20.0694	1.03958e-29	5.74028e-28	57.3114
ZNF3	1.09708	6.56918	20.0674	1.04547e-29	5.74379e-28	57.3057
POLQ	2.1541	4.03059	20.0324	1.15403e-29	6.30848e-28	57.2067
PPP1R15A	-2.39767	7.48093	-20.0258	1.17572e-29	6.39508e-28	57.188
ADCY4	-1.92655	6.23621	-19.9926	1.29119e-29	6.9884e-28	57.0941
SLC11A1	-2.64346	7.19922	-19.9781	1.34538e-29	7.24581e-28	57.0529
GIMAP6	-2.14657	6.78532	-19.9538	1.44105e-29	7.72303e-28	56.984
ANLN	3.20918	4.78872	19.947	1.46888e-29	7.83378e-28	56.9649
HIST1H2BC	2.47977	5.16347	19.9435	1.48351e-29	7.86169e-28	56.9549
WWC2	-2.49017	6.5025	-19.9423	1.48849e-29	7.86169e-28	56.9516
HIST1H2AL	3.26345	6.79833	19.9142	1.61215e-29	8.47385e-28	56.8716
XLKD1	-2.45376	5.6656	-19.8951	1.70167e-29	8.87404e-28	56.8174
VWF	-3.25596	8.47113	-19.8945	1.70452e-29	8.87404e-28	56.8157
SMAD6	-2.39953	7.34193	-19.8906	1.72362e-29	8.93099e-28	56.8045
GTSE1	1.61156	5.02712	19.8731	1.81114e-29	9.3402e-28	56.7549
AP3B2	1.42504	4.49501	19.8474	1.9483e-29	1.00003e-27	56.6817
SH2D3C	-2.05618	7.2197	-19.8114	2.15857e-29	1.10279e-27	56.5789
ZNF146	1.89215	6.74081	19.7547	2.5367e-29	1.28994e-27	56.4171
BUB3	1.57679	8.3647	19.7331	2.69802e-29	1.36562e-27	56.3553
PALM2-AKAP2	-1.97057	6.90053	-19.6975	2.9863e-29	1.50457e-27	56.2535
CBX5	1.52314	8.15336	19.6881	3.06769e-29	1.53849e-27	56.2265
ABCA3	-2.76404	8.25641	-19.6818	3.12336e-29	1.55925e-27	56.2085
GNG4	3.33748	5.45687	19.6656	3.27113e-29	1.6256e-27	56.1621
RBBP4	1.58449	8.84644	19.6463	3.4569e-29	1.71015e-27	56.1067
GMPS	1.39199	7.12058	19.6106	3.82967e-29	1.88603e-27	56.0041
RIF1	1.42213	6.75424	19.6049	3.89234e-29	1.90829e-27	55.9878
WWTR1	-2.65165	7.57747	-19.5968	3.98434e-29	1.94468e-27	55.9644
VIM	-1.95426	10.0732	-19.594	4.01609e-29	1.95146e-27	55.9564
ORC6L	2.31621	4.6892	19.5728	4.26743e-29	2.06442e-27	55.8955
SLC34A2	-4.11247	9.81195	-19.5638	4.37988e-29	2.10948e-27	55.8694
C10orf56	-1.62718	6.59157	-19.5472	4.59305e-29	2.20245e-27	55.8218
SH3D19	-2.55915	6.75957	-19.5438	4.6388e-29	2.21467e-27	55.8119
C21orf45	1.62113	5.77657	19.4925	5.37623e-29	2.55558e-27	55.6639
GNG11	-2.74477	5.65086	-19.4532	6.01935e-29	2.8489e-27	55.5506
SIP1	1.47473	4.75113	19.4152	6.71705e-29	3.16541e-27	55.4406
CCDC69	-2.11259	6.03684	-19.4102	6.81482e-29	3.1977e-27	55.4261
OLR1	-3.50286	6.97142	-19.3988	7.04322e-29	3.27603e-27	55.3931
PRPF4	1.20198	7.11074	19.398	7.05855e-29	3.27603e-27	55.3909
PRKCH	-2.03135	7.52006	-19.3974	7.07164e-29	3.27603e-27	55.389
C14orf58	-2.16044	6.07012	-19.3825	7.38192e-29	3.40534e-27	55.346
GJA5	-2.57728	6.37933	-19.3613	7.84913e-29	3.60565e-27	55.2844
FANCB	2.05027	3.34119	19.3563	7.96207e-29	3.64223e-27	55.2701
PAFAH1B3	1.43751	6.31675	19.3424	8.2901e-29	3.77648e-27	55.2296
XPO5	1.44139	6.5157	19.3387	8.37874e-29	3.80103e-27	55.2189
CDKN3	2.54534	4.30592	19.3308	8.57312e-29	3.87314e-27	55.1959
CD36	-3.07792	6.85694	-19.3145	8.98681e-29	4.04332e-27	55.1487
SLC19A3	-1.81331	4.97392	-19.2792	9.95713e-29	4.45369e-27	55.0458
FXYD5	-1.86338	7.61749	-19.2783	9.98036e-29	4.45369e-27	55.0435
RASGRF1	-1.3704	4.9786	-19.2728	1.01424e-28	4.5076e-27	55.0274
FAM38A	-1.82015	7.00253	-19.2701	1.02219e-28	4.52374e-27	55.0195
CAPN3	-1.64491	5.90834	-19.2688	1.02615e-28	4.52374e-27	55.0156
C19orf48	1.9683	5.84362	19.2667	1.0323e-28	4.53258e-27	55.0097
SNORD30	2.42665	6.09471	19.2652	1.03687e-28	4.53445e-27	55.0052
NVL	1.19865	6.19521	19.2633	1.04252e-28	4.54098e-27	54.9998
CDC7	2.54924	4.55302	19.2402	1.11474e-28	4.83631e-27	54.9326
CNN2	-2.4173	7.75839	-19.2385	1.12054e-28	4.84224e-27	54.9274
APPBP1	1.6584	6.63117	19.2367	1.12616e-28	4.84736e-27	54.9224
RBBP7	1.44756	7.75949	19.2342	1.13442e-28	4.86379e-27	54.915
HMGB2	2.76438	7.01171	19.2276	1.15653e-28	4.93922e-27	54.8957
CDCA2	2.09732	4.13365	19.2259	1.16218e-28	4.944e-27	54.8908
CCL14	-2.15358	6.12933	-19.2227	1.17306e-28	4.96754e-27	54.8814
PAICS	1.93131	6.01691	19.2216	1.1768e-28	4.96754e-27	54.8783
RIPK3	-1.12621	5.53326	-19.2024	1.24439e-28	5.23268e-27	54.8222
UNC13D	-1.65211	6.40449	-19.1909	1.28668e-28	5.37351e-27	54.7887
PTGIR	-1.59529	5.69896	-19.1906	1.28772e-28	5.37351e-27	54.7879
RAD51AP1	2.98885	4.02131	19.1699	1.36791e-28	5.68645e-27	54.7273
ADCY9	-1.49366	6.51789	-19.1468	1.463e-28	6.05869e-27	54.6599
CDC25C	1.8418	4.19561	19.1383	1.4998e-28	6.18765e-27	54.635
HIST1H2BD	2.52098	6.97863	19.1316	1.52912e-28	6.28493e-27	54.6156
ZNF566	1.82557	5.3983	19.126	1.55435e-28	6.36468e-27	54.5992
FZD3	2.49659	5.16368	19.1094	1.63179e-28	6.65686e-27	54.5504
CBX1	1.87198	6.80156	19.074	1.8093e-28	7.35355e-27	54.4468
PIGW	1.8627	5.01802	19.045	1.9698e-28	7.97624e-27	54.3616
FEN1	1.76693	5.56972	19.0417	1.98877e-28	8.02331e-27	54.352
C14orf145	1.79073	5.34794	19.0355	2.02486e-28	8.12885e-27	54.3339
ANGPT1	-2.31182	5.0641	-19.0347	2.0298e-28	8.12885e-27	54.3315
PAXIP1	1.51566	5.65486	18.971	2.4463e-28	9.7611e-27	54.1443
PTPRE	-1.48376	5.90119	-18.951	2.5945e-28	1.03148e-26	54.0853
ADD2	1.82388	5.74353	18.9299	2.75991e-28	1.09326e-26	54.0233
C1orf112	2.06633	4.22982	18.9247	2.80245e-28	1.10611e-26	54.0079
FLJ10292	1.28633	6.27303	18.9194	2.84644e-28	1.11943e-26	53.9923
CISH	-1.68867	7.13633	-18.9068	2.95429e-28	1.15768e-26	53.955
GPR109A	-1.70229	5.9437	-18.8945	3.06253e-28	1.19581e-26	53.9189
HLTF	1.83669	5.75052	18.8923	3.08281e-28	1.19944e-26	53.9123
CKAP5	1.62147	6.68999	18.889	3.11292e-28	1.20686e-26	53.9025
HHIP	-3.01619	6.54398	-18.8742	3.25081e-28	1.25587e-26	53.859
NUP62CL	2.20582	4.86112	18.8515	3.47643e-28	1.3383e-26	53.7917
PRELP	-2.80339	7.77742	-18.8423	3.57112e-28	1.36993e-26	53.7648
C17orf75	1.75274	6.07369	18.8223	3.78888e-28	1.44469e-26	53.7054
FCN1	-1.82756	7.06793	-18.822	3.79243e-28	1.44469e-26	53.7044
SEP3	1.85113	4.6351	18.8066	3.96829e-28	1.50643e-26	53.659
PGM5	-2.0036	5.33357	-18.7898	4.16951e-28	1.57734e-26	53.6094
ADAMTS8	-1.82445	6.28381	-18.7879	4.19313e-28	1.58081e-26	53.6037
POLE2	2.38927	3.74629	18.7836	4.24667e-28	1.59495e-26	53.591
PRKCQ	-1.53052	5.2007	-18.7826	4.2598e-28	1.59495e-26	53.5879
PLK1	2.70309	5.93575	18.7526	4.65384e-28	1.73653e-26	53.4991
ALOX5AP	-3.51199	7.45456	-18.7451	4.75908e-28	1.76526e-26	53.4767
HPGD	-3.74261	6.7961	-18.7448	4.76312e-28	1.76526e-26	53.4758
USP1	2.37798	6.38951	18.739	4.84542e-28	1.78969e-26	53.4586
C20orf32	-1.60564	5.59554	-18.672	5.90852e-28	2.17501e-26	53.2596
RAB11FIP1	-2.13944	7.54456	-18.6515	6.28074e-28	2.30427e-26	53.1983
C10orf54	-1.75678	6.72708	-18.6496	6.31518e-28	2.30916e-26	53.1929
PHOSPHO2	1.73253	5.32246	18.6395	6.50783e-28	2.37167e-26	53.1627
AOF2	1.74265	7.63628	18.6285	6.72396e-28	2.44229e-26	53.1299
CCDC99	2.26181	4.8244	18.6272	6.7501e-28	2.44367e-26	53.126
RILP	-1.40401	6.95603	-18.6257	6.7801e-28	2.44643e-26	53.1216
AGTR1	-1.23727	4.846	-18.602	7.27399e-28	2.61503e-26	53.051
C1orf162	-2.75592	7.37343	-18.6011	7.2952e-28	2.61503e-26	53.0481
FABP4	-3.55459	4.86028	-18.5703	7.99352e-28	2.85599e-26	52.9564
GAS7	-1.37583	5.86263	-18.5531	8.41412e-28	2.99647e-26	52.9049
ALS2CL	-1.51151	6.17771	-18.5515	8.45545e-28	3.00141e-26	52.9
PARP1	1.89668	7.1435	18.5161	9.39537e-28	3.32426e-26	52.7943
PSPH	1.14578	6.45676	18.465	1.0943e-27	3.84695e-26	52.6413
ZFP36	-3.31809	8.24302	-18.4439	1.16571e-27	4.08485e-26	52.5778
GALNTL4	-1.74919	6.22975	-18.4203	1.25097e-27	4.36961e-26	52.507
HSF2	1.49302	5.84733	18.3983	1.33615e-27	4.65225e-26	52.4409
ZNHIT3	1.2827	5.98658	18.3954	1.34794e-27	4.67843e-26	52.4321
GMNN	2.39847	5.37761	18.3941	1.35296e-27	4.68099e-26	52.4284
SH3RF2	-1.02956	5.29735	-18.3928	1.35825e-27	4.68446e-26	52.4245
SNORD31	2.72546	4.09006	18.3888	1.37471e-27	4.72632e-26	52.4124
FLRT3	-2.89764	6.12361	-18.3814	1.40566e-27	4.8176e-26	52.39
PRKCD	-1.81451	7.3519	-18.3565	1.51466e-27	5.17494e-26	52.3151
RNASEH2A	1.99741	6.59599	18.3507	1.54128e-27	5.24946e-26	52.2976
ANXA1	-2.90298	8.89299	-18.3281	1.64947e-27	5.6005e-26	52.2295
ZKSCAN1	1.08779	7.61924	18.3192	1.69393e-27	5.73366e-26	52.2029
FMO2	-3.66097	7.79938	-18.3117	1.73303e-27	5.84789e-26	52.18
PRKDC	1.50368	7.51899	18.2909	1.84445e-27	6.20472e-26	52.1174
PARVA	-1.37439	7.58705	-18.2724	1.95017e-27	6.53746e-26	52.0615
FLJ32745	1.51997	4.5992	18.2715	1.95532e-27	6.53746e-26	52.0589
RAMP3	-2.24325	7.0443	-18.2703	1.96242e-27	6.54121e-26	52.0552
C1orf176	1.4064	5.46799	18.263	2.00602e-27	6.66622e-26	52.0332
CCT3	1.46195	7.88501	18.2337	2.19145e-27	7.2384e-26	51.9445
ARL6IP1	1.57908	10.4228	18.2291	2.22216e-27	7.31772e-26	51.9305
ANXA11	-1.95307	8.40221	-18.2257	2.24481e-27	7.37011e-26	51.9203
PRKCE	-1.8403	7.05117	-18.2048	2.3911e-27	7.82693e-26	51.857
NUP43	1.07126	6.53553	18.1922	2.48326e-27	8.10432e-26	51.819
RAB27B	-2.33438	5.01197	-18.181	2.56887e-27	8.35876e-26	51.785
RASL12	-1.43687	6.0228	-18.1792	2.58325e-27	8.3806e-26	51.7794
GATA6	-1.50858	7.40182	-18.17	2.6562e-27	8.59178e-26	51.7514
PVRL2	-1.30515	7.50246	-18.1495	2.82547e-27	9.08053e-26	51.6894
GRIP1	2.03604	4.24458	18.1487	2.83222e-27	9.08053e-26	51.6871
ZNF669	1.18382	5.4823	18.1065	3.21849e-27	1.02888e-25	51.5588
APOB48R	-1.32067	5.73173	-18.0923	3.35972e-27	1.0709e-25	51.5157
PDE4A	-1.29835	5.88959	-18.0904	3.37872e-27	1.07382e-25	51.51
FMNL1	-1.64989	7.05767	-18.0782	3.50675e-27	1.11128e-25	51.4727
PODXL	-1.74866	7.77903	-18.0735	3.55645e-27	1.12378e-25	51.4585
XRCC5	1.21538	8.82289	18.0587	3.72055e-27	1.17224e-25	51.4133
RAMP2	-2.09998	6.65699	-18.0577	3.73182e-27	1.17241e-25	51.4102
GINS1	2.7652	5.15291	18.026	4.10839e-27	1.28702e-25	51.3138
OLFML1	-2.21983	5.14204	-18.0244	4.12898e-27	1.28978e-25	51.3087
PPM1E	1.92681	4.41797	18.0167	4.22589e-27	1.31629e-25	51.2855
ADCY7	-1.79339	6.91636	-17.9992	4.4575e-27	1.38449e-25	51.2319
ZMYM1	1.45043	5.02382	17.9958	4.50269e-27	1.39456e-25	51.2218
ZFP106	-1.17376	7.90372	-17.9909	4.57038e-27	1.40955e-25	51.2068
ANKRD32	2.04908	4.41845	17.9905	4.57687e-27	1.40955e-25	51.2054
ZFPM2	-1.53782	5.36223	-17.9879	4.6129e-27	1.41665e-25	51.1975
ZNF420	1.64043	5.16893	17.9724	4.83495e-27	1.48069e-25	51.1503
CEP55	2.50941	3.63555	17.9527	5.13459e-27	1.56806e-25	51.09
C6orf117	2.47491	4.82895	17.9504	5.17008e-27	1.5745e-25	51.0831
CDH2	4.03031	5.41163	17.9458	5.24423e-27	1.59264e-25	51.0688
POLG2	1.19418	5.31425	17.9179	5.70899e-27	1.72898e-25	50.9836
SSRP1	1.12616	7.94174	17.8953	6.11685e-27	1.84739e-25	50.9143
RAD54L	1.72919	4.85834	17.8713	6.58127e-27	1.98218e-25	50.8409
C12orf48	1.85859	3.41967	17.8619	6.77275e-27	2.03424e-25	50.8121
ZNF260	1.99251	5.55623	17.8411	7.21878e-27	2.16227e-25	50.7481
CGN	-1.4444	6.21703	-17.8193	7.71591e-27	2.30487e-25	50.6812
RBM12B	1.33806	6.71995	17.808	7.98701e-27	2.37935e-25	50.6466
PPARG	-2.83706	6.06274	-17.7847	8.57978e-27	2.54899e-25	50.5747
PXN	-1.7062	7.10148	-17.7792	8.72473e-27	2.58503e-25	50.5579
CEBPD	-2.3333	8.18378	-17.7499	9.54666e-27	2.82091e-25	50.4675
UPF3B	1.85659	5.05615	17.7032	1.1018e-26	3.24688e-25	50.3237
ZNF670	1.50164	4.73913	17.6989	1.11632e-26	3.28085e-25	50.3105
PLEKHQ1	-1.95776	7.21509	-17.6974	1.12167e-26	3.28771e-25	50.3057
GKN2	-3.48935	5.5597	-17.6857	1.16269e-26	3.38978e-25	50.2697
FAM62C	-1.46969	5.90083	-17.6668	1.2325e-26	3.58377e-25	50.2111
SLC31A2	-2.08038	7.35815	-17.6258	1.3981e-26	4.05448e-25	50.0846
HIST1H2BL	2.33749	6.93152	17.6065	1.48403e-26	4.2849e-25	50.0247
ADAMTSL4	-1.67061	6.28702	-17.6062	1.48539e-26	4.2849e-25	50.0238
PCNA	2.61822	7.46142	17.5597	1.71465e-26	4.93322e-25	49.8797
RASSF2	-2.06003	6.69102	-17.5527	1.75256e-26	5.01972e-25	49.8578
FRMD4B	-2.01427	6.44872	-17.5414	1.81476e-26	5.18036e-25	49.8228
CLIC3	-1.89062	6.55317	-17.5259	1.90402e-26	5.421e-25	49.7746
OVCH2	-1.25282	3.78549	-17.5152	1.96807e-26	5.58226e-25	49.7414
CD59	-1.79723	8.94188	-17.5147	1.97087e-26	5.58226e-25	49.7399
C7	-3.53795	7.68948	-17.4931	2.10766e-26	5.95427e-25	49.6726
VSIG4	-3.52138	7.8175	-17.4802	2.19351e-26	6.18083e-25	49.6325
PTS	1.38301	6.32696	17.4723	2.248e-26	6.31809e-25	49.6079
CNN1	-1.64175	5.86639	-17.4612	2.32677e-26	6.51374e-25	49.5733
HIST1H2AK	2.28995	7.38088	17.4608	2.32953e-26	6.51374e-25	49.5721
CGNL1	-2.23613	6.47131	-17.4517	2.39574e-26	6.66478e-25	49.544
FAF1	1.4248	6.95281	17.4494	2.41336e-26	6.69676e-25	49.5366
PRIM2A	1.89927	4.37197	17.4424	2.46587e-26	6.82516e-25	49.515
C15orf42	2.11852	4.2011	17.4411	2.4762e-26	6.83645e-25	49.5108
ARHGAP30	-1.71728	6.54924	-17.39	2.90198e-26	7.99176e-25	49.3515
CENPO	2.0782	5.67556	17.3754	3.03767e-26	8.34443e-25	49.3057
PRICKLE2	-2.14989	6.3945	-17.3556	3.23057e-26	8.85207e-25	49.2439
SIDT2	-1.75985	7.93754	-17.3399	3.39223e-26	9.27181e-25	49.1948
C21orf66	1.1567	6.66706	17.3342	3.45257e-26	9.4132e-25	49.1771
CCT2	1.77424	8.03124	17.3263	3.53867e-26	9.62396e-25	49.1524
XPO1	1.62535	7.66437	17.3198	3.61193e-26	9.79882e-25	49.1318
FGR	-2.27875	7.44878	-17.3009	3.83118e-26	1.03679e-24	49.0727
SLC16A1	2.1168	6.26893	17.2962	3.88822e-26	1.04963e-24	49.0578
ZWILCH	2.00946	4.64538	17.2933	3.92271e-26	1.05633e-24	49.049
ZNF551	1.48955	4.97899	17.2826	4.05647e-26	1.08967e-24	49.0153
OXCT1	1.46511	6.35274	17.2591	4.36577e-26	1.16702e-24	48.9415
SKP2	1.82055	6.53807	17.2489	4.50638e-26	1.20166e-24	48.9097
C9orf19	-2.18807	7.28739	-17.2477	4.52376e-26	1.20336e-24	48.9059
ZIK1	1.82655	5.77255	17.2208	4.92158e-26	1.30601e-24	48.8212
FBXO5	2.61785	5.72066	17.2082	5.11924e-26	1.35254e-24	48.7817
FLJ34515	-2.26829	6.42054	-17.208	5.12167e-26	1.35254e-24	48.7812
CCDC68	-1.83155	4.27691	-17.2072	5.13513e-26	1.35283e-24	48.7786
PKNOX2	-1.18607	5.6446	-17.2062	5.15093e-26	1.35373e-24	48.7755
AQP9	-3.08404	6.35908	-17.1675	5.81501e-26	1.52459e-24	48.6538
BTNL9	-2.03341	7.26332	-17.1654	5.85316e-26	1.53092e-24	48.6472
PIGX	1.55239	6.18504	17.1633	5.89171e-26	1.53733e-24	48.6406
AKAP2	-2.70018	7.78392	-17.1461	6.21984e-26	1.61908e-24	48.5862
C5AR1	-2.62615	7.09551	-17.1274	6.59616e-26	1.71297e-24	48.5272
C15orf23	2.17275	5.61221	17.1228	6.69242e-26	1.73384e-24	48.5127
C17orf80	1.34341	5.48123	17.1131	6.89766e-26	1.78279e-24	48.4824
FHOD1	-1.2611	5.99423	-17.1091	6.98502e-26	1.80111e-24	48.4697
CDC42EP1	-1.96011	7.20563	-17.0851	7.53308e-26	1.93786e-24	48.3939
HIST1H3I	4.15216	7.78185	17.0816	7.61681e-26	1.9548e-24	48.3828
PPME1	1.0633	6.92513	17.0803	7.64732e-26	1.95804e-24	48.3788
RIN2	-1.57545	7.89048	-17.0683	7.94256e-26	2.02888e-24	48.3407
FBP1	-2.99185	8.11723	-17.0631	8.07376e-26	2.05759e-24	48.3243
CCDC5	1.86513	4.79075	17.0596	8.16314e-26	2.07553e-24	48.3132
FBLN1	-2.18338	8.6934	-17.0585	8.19247e-26	2.07815e-24	48.3096
RAN	1.58374	7.87718	17.0565	8.24441e-26	2.08648e-24	48.3033
PARP2	1.64925	5.93229	17.0551	8.2809e-26	2.09088e-24	48.2989
FANCD2	1.63797	4.72552	17.0504	8.40375e-26	2.11701e-24	48.2841
ZYX	-2.2544	8.26227	-17.0494	8.43059e-26	2.11889e-24	48.2809
ZNF84	1.51304	6.11639	17.0428	8.60634e-26	2.1581e-24	48.2602
PLEC1	-1.63218	7.53906	-17.0343	8.84162e-26	2.21202e-24	48.2331
VRK1	2.868	5.37122	17.0276	9.02864e-26	2.25366e-24	48.2121
ZNF567	1.25507	3.90043	17.0269	9.05061e-26	2.25399e-24	48.2096
PDGFB	-2.02438	6.01465	-17.0172	9.32925e-26	2.31811e-24	48.1792
RFC3	2.27503	6.21355	17.0158	9.37244e-26	2.32356e-24	48.1745
RIN3	-1.1948	6.25002	-17.0068	9.64275e-26	2.37978e-24	48.146
UNC5C	-1.06328	4.96792	-16.9998	9.85654e-26	2.42706e-24	48.124
NUP155	1.97073	6.75816	16.9967	9.95309e-26	2.44533e-24	48.1142
HIST1H3B	4.35862	7.68378	16.9514	1.14866e-25	2.81576e-24	47.9703
ACTG2	-1.73034	7.23624	-16.948	1.16092e-25	2.83944e-24	47.9597
SMAD7	-1.76417	6.71626	-16.936	1.20578e-25	2.93406e-24	47.9216
RAPGEF1	-1.33013	7.50525	-16.9355	1.20765e-25	2.93406e-24	47.92
A2M	-2.78585	10.6552	-16.9144	1.29139e-25	3.13055e-24	47.8527
AURKA	2.84086	4.98202	16.8986	1.35765e-25	3.28388e-24	47.8025
SLC5A4	-1.2207	4.73026	-16.8832	1.42543e-25	3.44023e-24	47.7536
ZNF228	1.5939	4.84027	16.857	1.5489e-25	3.72638e-24	47.6702
ZNF749	2.17933	4.26395	16.8566	1.55081e-25	3.72638e-24	47.6689
C14orf130	1.7604	5.71002	16.8544	1.56174e-25	3.74442e-24	47.6619
SH2D1A	1.33168	6.30667	16.8461	1.6036e-25	3.83635e-24	47.6353
SLC9A3R2	-2.47603	8.41862	-16.8275	1.70076e-25	4.05992e-24	47.5762
PTGS2	-3.30011	6.72122	-16.8264	1.70717e-25	4.06203e-24	47.5725
C14orf93	1.19909	5.51889	16.826	1.70908e-25	4.06203e-24	47.5714
C20orf75	-2.22004	6.30108	-16.8062	1.82023e-25	4.31684e-24	47.5081
RARA	-1.31882	6.55701	-16.803	1.83896e-25	4.3518e-24	47.4978
GUCY1A3	-2.23034	7.21321	-16.7941	1.89129e-25	4.46597e-24	47.4696
CFP	-1.04177	5.74151	-16.7836	1.95574e-25	4.5983e-24	47.436
HIST1H2BJ	2.35781	4.0141	16.7825	1.96244e-25	4.60415e-24	47.4326
HDAC2	1.7839	6.06146	16.7788	1.98571e-25	4.64877e-24	47.4207
CCDC48	-1.40019	6.80949	-16.7614	2.09905e-25	4.90361e-24	47.365
SHCBP1	1.89038	4.61244	16.7586	2.11787e-25	4.93703e-24	47.356
CCDC77	1.60144	5.43783	16.741	2.23993e-25	5.21045e-24	47.2998
AXL	-1.73866	7.24932	-16.7252	2.35577e-25	5.46829e-24	47.2491
PMP22	-2.99201	8.89664	-16.7155	2.42926e-25	5.62692e-24	47.2183
FOXM1	2.20821	5.35004	16.7146	2.43644e-25	5.63162e-24	47.2153
PER1	-2.14809	6.74816	-16.7107	2.46741e-25	5.69118e-24	47.2026
FBXO45	1.89988	5.06002	16.7098	2.47424e-25	5.69491e-24	47.1999
UTRN	-2.54235	7.91396	-16.6838	2.68853e-25	6.17516e-24	47.1165
CFLAR	-1.31563	8.03423	-16.676	2.7561e-25	6.31708e-24	47.0915
SNRK	-1.06404	7.89989	-16.67	2.80956e-25	6.42612e-24	47.0722
RDHE2	-2.24351	5.06655	-16.6666	2.84062e-25	6.48361e-24	47.0612
76P	1.06982	6.21971	16.6487	3.00739e-25	6.84995e-24	47.0039
SNORD26	2.4114	7.15505	16.6401	3.09156e-25	7.02703e-24	46.9762
FAM33A	1.89425	6.76973	16.6365	3.12765e-25	7.09432e-24	46.9645
FKBP3	1.77201	5.31427	16.5866	3.66915e-25	8.28818e-24	46.8042
ZBTB4	-1.22843	6.36872	-16.5856	3.68123e-25	8.29834e-24	46.8009
XRCC2	2.42784	4.67305	16.5792	3.75691e-25	8.45149e-24	46.7805
ACBD7	2.41383	4.30009	16.5777	3.77561e-25	8.47613e-24	46.7755
PRR11	2.62737	4.78972	16.5737	3.82405e-25	8.56728e-24	46.7627
AMICA1	-2.9801	7.17673	-16.5667	3.91074e-25	8.74358e-24	46.7402
CKAP2L	2.24692	4.37779	16.5515	4.10668e-25	9.14426e-24	46.6911
ZNF326	1.50855	5.91134	16.5304	4.39448e-25	9.76522e-24	46.6231
PTGER2	-1.84679	5.22898	-16.5267	4.44653e-25	9.86082e-24	46.6112
HDAC7A	-1.27892	6.91065	-16.5149	4.61831e-25	1.0221e-23	46.5732
SH3RF1	-1.1294	6.76094	-16.5039	4.78557e-25	1.05698e-23	46.5375
AGRN	-1.4333	6.94137	-16.4999	4.8476e-25	1.06642e-23	46.5245
VPS45	1.44969	7.19099	16.4998	4.8478e-25	1.06642e-23	46.5245
HIST1H3A	3.17451	5.63514	16.4914	4.98119e-25	1.09353e-23	46.4972
FANCM	1.34266	3.93873	16.4906	4.99427e-25	1.09353e-23	46.4946
FHL5	-2.03887	4.69579	-16.49	5.00394e-25	1.09353e-23	46.4927
FUBP1	1.21175	8.45603	16.4895	5.01106e-25	1.09353e-23	46.4912
FH	1.14758	5.8481	16.4803	5.16287e-25	1.12442e-23	46.4613
SHC3	-1.38789	5.85773	-16.4793	5.17901e-25	1.12569e-23	46.4581
NUCKS1	1.19809	9.12267	16.4573	5.5587e-25	1.20582e-23	46.3871
AGK	1.39371	6.30188	16.4541	5.61664e-25	1.21597e-23	46.3767
ZNF607	1.48567	4.22083	16.4513	5.66774e-25	1.22461e-23	46.3676
RFTN1	-1.75902	7.47218	-16.424	6.18857e-25	1.33292e-23	46.2793
ATP11A	-1.66476	7.67071	-16.4238	6.19341e-25	1.33292e-23	46.2785
ARHGAP27	-1.09442	5.94898	-16.4114	6.44501e-25	1.38435e-23	46.2385
ZBTB41	1.3814	6.67338	16.4088	6.49941e-25	1.3933e-23	46.2301
GGTLA4	-1.75846	4.86561	-16.3903	6.89907e-25	1.47608e-23	46.1701
POLA2	1.7614	6.15488	16.3731	7.2941e-25	1.55755e-23	46.1142
ALOX5	-2.74349	8.12145	-16.352	7.80983e-25	1.66119e-23	46.0456
CDR1	-3.05289	5.5469	-16.3474	7.92631e-25	1.68156e-23	46.0308
POLE	1.62535	6.01165	16.347	7.93637e-25	1.68156e-23	46.0295
EXOSC9	1.06954	6.81723	16.3447	7.99597e-25	1.69091e-23	46.022
ACSL5	-2.7058	6.94169	-16.3428	8.04503e-25	1.69687e-23	46.0158
APLP2	-1.1133	10.0569	-16.3424	8.05521e-25	1.69687e-23	46.0146
HLF	-2.11439	6.08442	-16.3375	8.18333e-25	1.72055e-23	45.9987
BRD8	1.09531	6.25161	16.3121	8.88538e-25	1.86457e-23	45.9161
RFC2	1.86412	6.58721	16.3078	9.00939e-25	1.88697e-23	45.9021
FUS	1.01915	8.89836	16.3048	9.09807e-25	1.9019e-23	45.8923
ARHGDIB	-2.15394	8.58062	-16.2765	9.97186e-25	2.07662e-23	45.8002
HOOK1	2.44036	5.12964	16.2685	1.02335e-24	2.12706e-23	45.7742
FAM29A	1.72436	5.18116	16.2525	1.07813e-24	2.23666e-23	45.7218
ADPRH	-1.36112	4.81753	-16.2507	1.08414e-24	2.24486e-23	45.7163
CHRNB2	1.52472	5.46159	16.2466	1.099e-24	2.27133e-23	45.7026
C10orf137	1.03762	5.97209	16.2318	1.15303e-24	2.37834e-23	45.6544
ZNF544	1.16798	5.06498	16.2312	1.15512e-24	2.37834e-23	45.6526
CD37	-2.59654	7.94163	-16.2285	1.16547e-24	2.39512e-23	45.6436
OSMR	-2.58732	7.26854	-16.2071	1.24916e-24	2.55749e-23	45.574
GNAI2	-1.47557	9.42041	-16.2052	1.25711e-24	2.56898e-23	45.5676
hCG_2023776	1.31366	6.22388	16.1866	1.33524e-24	2.72354e-23	45.507
BARD1	1.81531	6.03975	16.1841	1.34621e-24	2.73658e-23	45.4988
YAP1	-1.86566	7.74581	-16.184	1.34664e-24	2.73658e-23	45.4985
GIMAP1	-1.38717	5.60709	-16.168	1.41882e-24	2.87791e-23	45.4461
EXOSC2	1.27033	6.95399	16.1606	1.45343e-24	2.94265e-23	45.4219
ZNF138	1.51318	4.68462	16.157	1.47049e-24	2.9717e-23	45.4101
HSP90AA1	1.32721	10.3991	16.1517	1.49638e-24	3.01843e-23	45.3926
PTPRM	-2.47203	7.75002	-16.1271	1.62111e-24	3.26098e-23	45.3122
C5orf34	1.89261	3.5538	16.1268	1.62259e-24	3.26098e-23	45.3113
C10orf47	-1.03287	6.11704	-16.1115	1.70587e-24	3.42207e-23	45.261
ACE	-1.8505	6.38266	-16.0798	1.89176e-24	3.78802e-23	45.1572
CAV2	-3.17223	8.27753	-16.0724	1.93794e-24	3.8734e-23	45.1329
C14orf43	-1.02315	6.26938	-16.0449	2.12038e-24	4.23032e-23	45.0426
C4orf21	1.71632	3.95737	16.0411	2.14705e-24	4.27572e-23	45.03
CACNA2D2	-2.15424	7.33482	-16.0277	2.24278e-24	4.45823e-23	44.9862
RNF125	-1.62371	4.91894	-16.0258	2.25713e-24	4.47861e-23	44.9798
PPAP2B	-2.49244	8.64475	-16.0245	2.267e-24	4.49005e-23	44.9754
UTP11L	1.09927	6.20752	16.0214	2.29001e-24	4.52743e-23	44.9653
NUP133	1.24817	6.20722	16.0196	2.30357e-24	4.54602e-23	44.9594
PTGER4	-2.233	7.16078	-16.0125	2.35757e-24	4.64419e-23	44.9361
CCT6AP1	1.38852	5.58782	15.9867	2.56551e-24	5.04474e-23	44.8512
FHL1	-2.64496	8.34265	-15.9794	2.62769e-24	5.15772e-23	44.8271
ARHGAP23	-1.31493	6.90927	-15.9677	2.73069e-24	5.3503e-23	44.7885
C16orf30	-2.2997	7.92497	-15.967	2.73647e-24	5.35203e-23	44.7864
ZNF292	1.31671	7.0904	15.9556	2.84116e-24	5.54686e-23	44.7487
CCL15	-1.34269	5.24881	-15.9502	2.89157e-24	5.63521e-23	44.731
ZNF320	1.64717	4.76885	15.9466	2.92589e-24	5.69195e-23	44.7192
FOXF1	-1.1221	6.08706	-15.9407	2.98354e-24	5.79378e-23	44.6996
PLCE1	-1.67209	5.90797	-15.9335	3.05452e-24	5.92111e-23	44.676
C6orf125	1.29996	6.32638	15.9163	3.23279e-24	6.25559e-23	44.619
UPK3B	-1.78136	7.49047	-15.9074	3.32881e-24	6.43002e-23	44.5896
WAS	-1.02028	5.78829	-15.9065	3.33866e-24	6.43767e-23	44.5866
GPR146	-2.27427	5.7299	-15.882	3.61834e-24	6.96466e-23	44.5059
C8orf4	-2.19516	6.35093	-15.8782	3.66422e-24	7.04058e-23	44.4932
CD52	-3.07791	7.62347	-15.8709	3.75289e-24	7.19831e-23	44.4692
PCAF	-1.67861	6.64276	-15.8689	3.77808e-24	7.23062e-23	44.4625
FBL	1.24094	8.42551	15.8685	3.78296e-24	7.23062e-23	44.4612
OSTF1	-1.45797	7.54716	-15.8611	3.87615e-24	7.3958e-23	44.4367
C17orf69	1.30965	4.85173	15.8532	3.97823e-24	7.57734e-23	44.4106
ALMS1	1.45192	6.28433	15.85	4.02056e-24	7.64466e-23	44.4
FLJ20273	-1.45997	8.01299	-15.8418	4.13149e-24	7.84194e-23	44.3727
FARSB	1.42776	6.32847	15.8371	4.19604e-24	7.95067e-23	44.3571
CENPN	1.70954	4.88166	15.8358	4.21417e-24	7.97119e-23	44.3528
C9orf150	-1.70473	7.00663	-15.825	4.36652e-24	8.2451e-23	44.3171
CD33	-1.23672	5.4213	-15.8239	4.38292e-24	8.2618e-23	44.3133
GIMAP5	-2.41062	7.09541	-15.8157	4.50296e-24	8.47347e-23	44.2862
CASC5	2.60548	4.32939	15.8148	4.51633e-24	8.48402e-23	44.2832
RAB31	-2.45158	8.26877	-15.7814	5.04226e-24	9.44893e-23	44.1726
CDKAL1	2.19676	7.13861	15.7811	5.04726e-24	9.44893e-23	44.1716
APOO	1.88704	5.53721	15.7788	5.08581e-24	9.50481e-23	44.1639
GPR137C	2.23267	4.52269	15.7735	5.17608e-24	9.65163e-23	44.1463
SLC12A4	-1.5625	7.57482	-15.7731	5.18202e-24	9.65163e-23	44.1451
CCT4	1.32657	7.57468	15.7602	5.40756e-24	1.00546e-22	44.1023
C3orf64	-1.55735	5.91249	-15.7532	5.53453e-24	1.02589e-22	44.079
CBX7	-1.4732	5.99017	-15.7531	5.53621e-24	1.02589e-22	44.0787
GPR19	1.5239	3.35143	15.7479	5.63299e-24	1.04206e-22	44.0613
FANCG	1.37107	5.45466	15.7368	5.8442e-24	1.0793e-22	44.0243
SH3KBP1	-1.67128	7.07533	-15.7281	6.01502e-24	1.10897e-22	43.9954
HEATR1	1.1388	6.53997	15.7189	6.20122e-24	1.14138e-22	43.9648
C1orf198	-1.44864	7.7397	-15.7137	6.30764e-24	1.15902e-22	43.9477
CDCA5	1.93724	4.69985	15.7119	6.34661e-24	1.16422e-22	43.9415
CD9	-1.89447	9.60415	-15.7073	6.4422e-24	1.17977e-22	43.9265
CBX3	1.95412	7.37987	15.6971	6.66421e-24	1.21839e-22	43.8925
ARHGEF15	-1.32981	6.10443	-15.686	6.91524e-24	1.26218e-22	43.8553
HIST1H2BN	1.51324	7.48063	15.6687	7.32294e-24	1.33436e-22	43.7978
FAM20A	-1.93232	6.38263	-15.6657	7.39707e-24	1.34563e-22	43.7877
CELSR1	-1.43238	6.39778	-15.6592	7.55624e-24	1.3723e-22	43.7663
FOSL2	-2.17493	7.89361	-15.6571	7.61002e-24	1.37977e-22	43.7592
SH3BP5	-1.53635	7.21365	-15.6545	7.6761e-24	1.38945e-22	43.7505
CAPN2	-1.31346	8.85142	-15.6531	7.71303e-24	1.39383e-22	43.7457
ZNF366	-1.1263	4.87378	-15.6484	7.8336e-24	1.41095e-22	43.7301
BRMS1L	1.33003	4.86197	15.6467	7.87846e-24	1.4167e-22	43.7243
NT5E	2.05131	5.86109	15.6203	8.59917e-24	1.54167e-22	43.6364
VEGFC	-1.18251	6.36944	-15.6202	8.60265e-24	1.54167e-22	43.636
WDR54	1.40518	6.8424	15.6197	8.61576e-24	1.54167e-22	43.6345
PLCD1	-1.05656	6.07193	-15.6021	9.13685e-24	1.63224e-22	43.5755
GNPAT	1.06186	7.37991	15.6	9.20135e-24	1.64108e-22	43.5685
RBMS1	-1.11986	6.9566	-15.5966	9.30488e-24	1.65684e-22	43.5572
PLXDC2	-2.41424	7.72447	-15.5832	9.72779e-24	1.72933e-22	43.5126
B3GNT7	-1.65566	6.07736	-15.5671	1.02647e-23	1.82182e-22	43.4586
FGD2	-1.55171	6.24188	-15.5663	1.02919e-23	1.82368e-22	43.456
FLT4	-1.29989	5.87508	-15.5629	1.04104e-23	1.8417e-22	43.4445
C1orf165	1.3613	5.05112	15.5606	1.04908e-23	1.85292e-22	43.4367
GMFG	-2.51237	7.73	-15.5581	1.05784e-23	1.86351e-22	43.4284
HIST2H2AB	2.44586	8.56708	15.5579	1.05849e-23	1.86351e-22	43.4278
BST1	-1.15606	6.3272	-15.5523	1.07818e-23	1.89513e-22	43.4092
VBP1	2.07744	5.53939	15.54	1.12338e-23	1.97141e-22	43.368
FER1L3	-2.15656	7.36233	-15.5362	1.13771e-23	1.99337e-22	43.3553
PPM1F	-1.22677	6.9503	-15.5308	1.15846e-23	2.02648e-22	43.3371
ZNF239	1.27744	3.82324	15.5273	1.1719e-23	2.04671e-22	43.3255
PEAR1	-1.0838	6.03139	-15.5252	1.18022e-23	2.05794e-22	43.3184
RIMBP2	1.37865	4.81534	15.5246	1.18271e-23	2.05901e-22	43.3163
NUP54	1.14682	6.21279	15.5173	1.21167e-23	2.10608e-22	43.292
ASAH1	-1.41557	9.07677	-15.5137	1.22646e-23	2.1284e-22	43.2798
HIGD1B	-1.37387	5.48515	-15.5087	1.2471e-23	2.16078e-22	43.2631
PAG1	-1.99297	6.54351	-15.5078	1.2508e-23	2.16377e-22	43.2601
FLJ23356	1.57702	6.98101	15.5044	1.26524e-23	2.18529e-22	43.2486
PCSK2	2.64556	5.75917	15.5003	1.28255e-23	2.21169e-22	43.2349
CCNE2	3.415	4.56476	15.4976	1.294e-23	2.22792e-22	43.226
ARHGEF3	-1.46878	6.78944	-15.4955	1.30315e-23	2.24014e-22	43.2189
SLC36A4	2.40105	6.13007	15.4933	1.31301e-23	2.25356e-22	43.2113
CDK2	1.59917	6.50018	15.4909	1.32351e-23	2.26801e-22	43.2033
ARMC1	1.43027	6.63909	15.4863	1.34387e-23	2.2993e-22	43.188
FAM7A2	2.29542	5.01115	15.4801	1.37195e-23	2.34367e-22	43.1672
FGFR1OP	1.06759	5.89341	15.4551	1.49158e-23	2.54406e-22	43.0833
PMPCB	1.38454	6.20572	15.4397	1.57079e-23	2.675e-22	43.0313
ZNF780B	1.69219	6.39122	15.417	1.69455e-23	2.87678e-22	42.9551
CASP8AP2	1.5362	5.69366	15.4029	1.77632e-23	3.01093e-22	42.9078
BTF3L4	1.14824	8.04374	15.4023	1.78009e-23	3.01265e-22	42.9056
PRICKLE1	-1.89337	6.23725	-15.3722	1.96925e-23	3.32763e-22	42.8042
GSN	-2.17207	9.04991	-15.3717	1.97238e-23	3.32779e-22	42.8026
QSCN6L1	1.03179	5.44529	15.3684	1.9943e-23	3.35452e-22	42.7915
HMMR	1.63562	3.30128	15.3684	1.99436e-23	3.35452e-22	42.7915
PDGFA	-1.29686	6.30653	-15.3644	2.02107e-23	3.39421e-22	42.7781
FLVCR	1.61883	5.58428	15.3551	2.08526e-23	3.49664e-22	42.7467
VDAC3	1.35987	8.22318	15.3342	2.23726e-23	3.74579e-22	42.676
P2RY1	-1.33568	6.07067	-15.332	2.25344e-23	3.76711e-22	42.6688
C1orf38	-2.25446	7.25149	-15.3311	2.26065e-23	3.77338e-22	42.6656
ZBTB7A	-1.01368	6.8312	-15.3301	2.26796e-23	3.77981e-22	42.6624
ANPEP	-2.48182	6.6412	-15.3186	2.3573e-23	3.92273e-22	42.6235
CENTD1	-2.00303	5.38684	-15.312	2.41011e-23	4.00451e-22	42.6013
BCL9L	-1.0442	6.39255	-15.2886	2.60748e-23	4.32089e-22	42.5222
GADD45B	-2.41608	8.00634	-15.2885	2.60842e-23	4.32089e-22	42.5219
ZFP36L2	-2.12073	8.73219	-15.2693	2.78285e-23	4.59591e-22	42.4569
SNED1	-1.09512	6.20501	-15.2285	3.19318e-23	5.26562e-22	42.3187
AHR	-2.41068	7.69825	-15.2165	3.32476e-23	5.4681e-22	42.2781
CAND1	1.66524	7.75647	15.2164	3.32598e-23	5.4681e-22	42.2778
SLC25A15	1.15125	5.52443	15.1989	3.52792e-23	5.7914e-22	42.2186
WNK3	2.3535	3.949	15.1982	3.53645e-23	5.79671e-22	42.2161
FXYD1	-2.23579	6.37835	-15.1898	3.63895e-23	5.95579e-22	42.1874
GNA15	-1.37243	5.87983	-15.1832	3.72057e-23	6.08026e-22	42.1652
HIST1H4H	1.85762	7.96471	15.1624	3.99141e-23	6.51315e-22	42.0946
C14orf166	1.15614	7.27745	15.1565	4.07167e-23	6.63421e-22	42.0746
HIST1H2AB	2.4377	4.50708	15.1551	4.09066e-23	6.65523e-22	42.0699
RNF149	-1.26504	8.30256	-15.1524	4.1287e-23	6.70714e-22	42.0606
ZFP1	1.0878	5.19501	15.1403	4.30098e-23	6.97665e-22	42.0195
CCND3	-1.50664	7.74659	-15.1386	4.32634e-23	6.9971e-22	42.0136
CLTB	-1.19925	7.72135	-15.1386	4.32639e-23	6.9971e-22	42.0136
HBEGF	-2.42057	7.61407	-15.1316	4.42972e-23	7.15364e-22	41.9899
FLNA	-1.79934	9.43959	-15.1304	4.44768e-23	7.17205e-22	41.9859
CENPM	1.17705	5.8979	15.1284	4.47757e-23	7.20962e-22	41.9791
GNAO1	2.23839	4.80012	15.127	4.49989e-23	7.2349e-22	41.9741
ARHGAP29	-2.4269	6.87799	-15.1155	4.67845e-23	7.51094e-22	41.935
YEATS4	1.87624	6.3476	15.114	4.70238e-23	7.53829e-22	41.9299
ACN9	1.98403	4.64307	15.1075	4.80569e-23	7.69262e-22	41.9081
CCT8	1.32538	7.24436	15.1051	4.84524e-23	7.74459e-22	41.8999
ATP2C2	-1.83188	6.09188	-15.1034	4.87358e-23	7.77853e-22	41.894
PTCD3	1.11899	6.81252	15.1008	4.91645e-23	7.83551e-22	41.8852
CIITA	-2.11443	6.78765	-15.0948	5.01718e-23	7.9844e-22	41.8648
SLPI	-3.76096	9.28665	-15.0929	5.04952e-23	8.02419e-22	41.8584
hCG_1646157	1.9834	3.4945	15.0923	5.06104e-23	8.03083e-22	41.8561
HIST1H4B	2.43639	7.02961	15.088	5.13498e-23	8.12456e-22	41.8415
ATP2B4	-1.38333	8.49921	-15.0836	5.21284e-23	8.23584e-22	41.8264
GDF10	-1.36682	5.9736	-15.0754	5.35979e-23	8.44361e-22	41.7985
CD300C	-1.4752	6.49057	-15.0603	5.63987e-23	8.8593e-22	41.7473
GUCY1A2	-1.6858	6.60005	-15.0575	5.69406e-23	8.93159e-22	41.7377
FLI1	-1.9275	7.2597	-15.0513	5.81528e-23	9.10866e-22	41.7166
UNC13B	-1.5136	7.11618	-15.0371	6.10306e-23	9.54574e-22	41.668
BCAM	-1.59196	7.29587	-15.0349	6.14968e-23	9.60492e-22	41.6604
RAB20	-1.16209	5.75694	-14.9942	7.06226e-23	1.10145e-21	41.5214
RASGRP2	-1.27461	6.03544	-14.9853	7.27902e-23	1.13364e-21	41.491
ZNF610	1.56979	4.85225	14.9844	7.29971e-23	1.13525e-21	41.4882
PDZK1IP1	-1.65459	6.46058	-14.9823	7.35322e-23	1.14194e-21	41.4809
C19orf33	-1.26799	6.46965	-14.9816	7.36953e-23	1.14264e-21	41.4786
PPIL1	1.27807	5.91216	14.9801	7.40872e-23	1.14568e-21	41.4733
HMGB3	3.16779	6.28158	14.9779	7.46409e-23	1.15261e-21	41.4658
GNPNAT1	1.33836	5.7119	14.9724	7.60519e-23	1.17274e-21	41.447
OSR1	-1.18065	5.64241	-14.9608	7.91123e-23	1.21682e-21	41.4074
SMARCA2	-1.4582	7.3253	-14.9607	7.91328e-23	1.21682e-21	41.4071
HSDL1	1.37176	5.92313	14.9585	7.97395e-23	1.22443e-21	41.3995
ZNF26	1.07856	5.16279	14.9543	8.0895e-23	1.24043e-21	41.385
RASSF8	-1.43796	6.20534	-14.9447	8.35747e-23	1.27972e-21	41.3523
H2AFY2	2.49929	6.14633	14.9361	8.60704e-23	1.31609e-21	41.3227
SNORD25	2.12222	3.72727	14.9347	8.64827e-23	1.32055e-21	41.3179
ORC3L	1.14244	6.289	14.9332	8.69051e-23	1.32515e-21	41.313
C12orf30	1.17387	5.93366	14.9325	8.71128e-23	1.32647e-21	41.3106
SIRPB2	-1.38212	5.18081	-14.9189	9.12719e-23	1.38787e-21	41.2638
HBB	-3.84974	7.89132	-14.9073	9.49372e-23	1.44159e-21	41.2242
CEP250	1.11225	5.41078	14.9021	9.66483e-23	1.46554e-21	41.2063
AMOTL2	-1.59164	6.68495	-14.8799	1.04273e-22	1.57897e-21	41.13
HCK	-2.16243	7.21596	-14.8753	1.05909e-22	1.60106e-21	41.1144
PRSS8	-2.02642	6.90746	-14.875	1.06025e-22	1.60106e-21	41.1133
RHOG	-1.55276	7.61771	-14.873	1.06768e-22	1.61006e-21	41.1063
EVA1	-2.39345	7.3427	-14.8711	1.07443e-22	1.61801e-21	41.0999
CHAF1A	1.41249	6.06986	14.8638	1.10163e-22	1.65668e-21	41.0748
C8orf32	1.48873	5.73028	14.8626	1.1063e-22	1.66143e-21	41.0706
ZSCAN12	1.17994	4.72129	14.8599	1.11657e-22	1.67455e-21	41.0613
RCSD1	-1.22524	6.49094	-14.8583	1.1226e-22	1.68128e-21	41.0559
PHYHIPL	2.41585	4.25134	14.856	1.13149e-22	1.69228e-21	41.0479
CDKN2C	2.55656	5.28114	14.8461	1.17041e-22	1.7481e-21	41.014
SNORD28	2.50444	3.62806	14.8338	1.2206e-22	1.82058e-21	40.9718
ATOH8	-1.69923	6.55792	-14.8313	1.23096e-22	1.83353e-21	40.9633
CCT5	1.326	7.24055	14.8293	1.23955e-22	1.84381e-21	40.9563
CASQ2	-1.24426	4.51476	-14.8272	1.2487e-22	1.8549e-21	40.9489
PLCB2	-1.80265	6.26285	-14.826	1.2539e-22	1.86009e-21	40.9448
MAR2	-1.55663	7.56087	-14.819	1.28402e-22	1.89796e-21	40.9209
ANG	-1.31387	5.86497	-14.8187	1.28539e-22	1.89796e-21	40.9198
FAM60A	2.4163	5.86268	14.8185	1.28637e-22	1.89796e-21	40.9191
SLC15A3	-2.40749	7.83355	-14.8153	1.3005e-22	1.91622e-21	40.9081
CDCA4	1.77033	6.03676	14.7983	1.37845e-22	2.02834e-21	40.8496
CENPE	1.75077	3.27107	14.7961	1.38908e-22	2.04123e-21	40.8419
PTHR1	-1.11996	5.75907	-14.7929	1.40428e-22	2.0608e-21	40.831
PDIK1L	1.25167	5.70277	14.7856	1.43977e-22	2.11005e-21	40.8059
HLA-DMA	-2.61844	8.32295	-14.7746	1.49513e-22	2.18826e-21	40.768
ZDHHC13	2.01444	6.20634	14.7722	1.50746e-22	2.20335e-21	40.7598
C14orf112	1.15659	7.43598	14.7657	1.54176e-22	2.24748e-21	40.7372
RAI2	-1.1932	5.10272	-14.7622	1.56025e-22	2.2714e-21	40.7252
PXMP2	1.28842	7.22092	14.7545	1.60164e-22	2.32546e-21	40.6989
UNC13A	1.79631	4.54478	14.7519	1.61609e-22	2.34332e-21	40.6899
PTPN6	-1.59403	7.45356	-14.7504	1.62477e-22	2.3528e-21	40.6845
AKNA	-1.23781	6.62599	-14.7488	1.63347e-22	2.36227e-21	40.6791
MAR5	1.13273	6.39074	14.7249	1.7734e-22	2.56124e-21	40.5966
PRMT6	1.14356	4.94983	14.7245	1.7758e-22	2.56132e-21	40.5952
SLC2A10	-1.11233	5.749	-14.724	1.7786e-22	2.56198e-21	40.5936
SIGLEC9	-1.39877	5.71933	-14.7198	1.80473e-22	2.59621e-21	40.579
ASNS	1.8318	7.25591	14.7193	1.80805e-22	2.59755e-21	40.5771
ACSL1	-1.89435	7.8429	-14.709	1.87305e-22	2.6874e-21	40.5417
GPR109B	-1.53973	4.12985	-14.704	1.90565e-22	2.7306e-21	40.5243
PMS1	1.15586	5.21188	14.6995	1.93503e-22	2.76906e-21	40.5089
AYTL2	-1.53756	8.77193	-14.6953	1.96321e-22	2.80572e-21	40.4944
PHF14	1.28552	6.67189	14.6933	1.97698e-22	2.81856e-21	40.4874
ZCCHC11	1.33328	6.68423	14.6932	1.97735e-22	2.81856e-21	40.4872
PLXND1	-1.25508	7.37638	-14.6892	2.00487e-22	2.85407e-21	40.4733
C1QTNF7	-1.60444	4.77894	-14.6832	2.04649e-22	2.90953e-21	40.4527
GRM8	1.8399	4.05776	14.6786	2.07924e-22	2.95112e-21	40.4367
PTPLAD1	1.44443	6.97041	14.6784	2.08114e-22	2.95112e-21	40.4358
PLD1	-1.27067	4.83858	-14.6706	2.1373e-22	3.02682e-21	40.4091
ZNF713	1.78129	4.65445	14.6666	2.16713e-22	3.0651e-21	40.3952
ACY1L2	1.56449	6.13377	14.6606	2.21201e-22	3.12454e-21	40.3746
C10orf128	-1.16121	5.20375	-14.6525	2.27488e-22	3.20919e-21	40.3464
FLII	-1.16577	7.46627	-14.6485	2.30621e-22	3.24919e-21	40.3327
CDCA3	1.529	4.72123	14.6476	2.31367e-22	3.25552e-21	40.3294
PTGDS	-3.00106	9.0726	-14.6437	2.3447e-22	3.29494e-21	40.316
C20orf94	1.63882	5.06507	14.6259	2.49367e-22	3.49978e-21	40.2542
OSTbeta	-1.31688	4.44624	-14.6219	2.52772e-22	3.54302e-21	40.2406
PHLDB1	-1.1596	6.87237	-14.6139	2.59849e-22	3.63755e-21	40.2128
CLSPN	2.52254	4.26495	14.6031	2.69755e-22	3.7714e-21	40.1752
ZNF766	1.47022	5.28892	14.5963	2.7614e-22	3.85573e-21	40.1517
SMC2	2.41471	5.00036	14.5941	2.78278e-22	3.88063e-21	40.144
SNHG3-RCC1	1.01866	5.77866	14.59	2.82224e-22	3.93065e-21	40.1298
CENPA	1.86456	5.55562	14.5853	2.86842e-22	3.98987e-21	40.1135
GPR157	-1.32642	6.13359	-14.5795	2.92688e-22	4.06603e-21	40.0933
RHOC	-1.5105	8.30119	-14.5716	3.00723e-22	4.17234e-21	40.0661
ZNF28	1.14504	5.76297	14.5681	3.04434e-22	4.21847e-21	40.0537
SIKE	1.05521	5.70898	14.5633	3.09477e-22	4.28293e-21	40.0372
SHANK3	-1.45926	6.63855	-14.5584	3.14748e-22	4.35036e-21	40.0203
SMC4	2.01977	6.45034	14.5496	3.24551e-22	4.4802e-21	39.9895
PTGIS	-1.98965	6.90642	-14.5421	3.33107e-22	4.59251e-21	39.9633
AVPI1	-1.65392	6.72461	-14.539	3.36679e-22	4.6359e-21	39.9526
USP39	1.00823	6.72237	14.5334	3.43254e-22	4.7205e-21	39.9332
C2	-2.39875	7.49523	-14.5291	3.48404e-22	4.7853e-21	39.9182
RAE1	1.70483	6.59985	14.5267	3.51237e-22	4.81817e-21	39.9101
BCL6B	-1.47884	6.02343	-14.523	3.55846e-22	4.87527e-21	39.897
SNAP25	2.32712	5.12258	14.52	3.59538e-22	4.91969e-21	39.8866
GATS	1.36646	5.9842	14.5173	3.62888e-22	4.95932e-21	39.8773
APEX1	1.00949	8.47702	14.5157	3.64894e-22	4.98051e-21	39.8718
PTPLAD2	-1.94877	5.52613	-14.5101	3.72063e-22	5.07203e-21	39.8522
PHTF1	1.60091	5.9019	14.5073	3.75655e-22	5.11461e-21	39.8426
RIMS2	2.99174	4.21425	14.5012	3.83764e-22	5.21852e-21	39.8211
CDK6	-1.41848	5.83253	-14.4981	3.87809e-22	5.26698e-21	39.8106
SNORD52	1.90769	5.17699	14.4752	4.19944e-22	5.68928e-21	39.7306
ZNF533	-1.61654	5.21194	-14.4747	4.20583e-22	5.69089e-21	39.7291
C11orf9	-1.3087	5.89352	-14.4644	4.3595e-22	5.89152e-21	39.6931
CACNA1A	2.94424	5.68595	14.462	4.39592e-22	5.9334e-21	39.6847
C21orf63	-1.38693	7.05961	-14.4588	4.44428e-22	5.99129e-21	39.6737
C20orf72	1.52391	5.69082	14.4572	4.46908e-22	6.0173e-21	39.6681
MAR6	1.18966	8.90813	14.452	4.55137e-22	6.12056e-21	39.6498
ZFP36L1	-1.74314	8.62754	-14.4484	4.60778e-22	6.18881e-21	39.6374
GPSM2	1.96725	5.95894	14.4413	4.72373e-22	6.33675e-21	39.6125
GNAI3	1.09081	7.67996	14.4383	4.77244e-22	6.39424e-21	39.6022
C14orf122	1.03813	5.40293	14.4363	4.80557e-22	6.43076e-21	39.5952
FEZ1	-1.02197	5.16059	-14.4311	4.89289e-22	6.5396e-21	39.5771
SNORD36A	1.83187	4.53994	14.4205	5.07707e-22	6.77749e-21	39.54
ORC5L	1.28031	5.48653	14.4034	5.38832e-22	7.18421e-21	39.4802
ADARB1	-1.93283	7.22237	-14.3988	5.47552e-22	7.29158e-21	39.4641
POT1	1.55079	5.06611	14.391	5.62489e-22	7.48138e-21	39.4371
C1orf163	1.12816	5.45992	14.3856	5.73138e-22	7.61375e-21	39.4182
VAMP8	-2.01158	8.9649	-14.3842	5.76061e-22	7.6433e-21	39.4131
VCL	-1.27028	7.76145	-14.3735	5.9796e-22	7.92423e-21	39.3756
VAMP3	-1.07406	7.80261	-14.3655	6.14857e-22	8.1383e-21	39.3476
C10orf64	-1.8304	5.75138	-14.3616	6.23199e-22	8.23874e-21	39.3341
SHMT2	1.60912	7.32758	14.3423	6.6657e-22	8.80146e-21	39.2665
ZNF643	1.3893	4.92369	14.337	6.78932e-22	8.95387e-21	39.2481
C1orf59	1.36709	4.53011	14.3339	6.86386e-22	9.04127e-21	39.2371
SMC3	1.67237	6.54184	14.332	6.90825e-22	9.0888e-21	39.2306
C6orf134	1.15682	5.68941	14.3265	7.04242e-22	9.24307e-21	39.2113
GINS3	1.40451	5.22973	14.2984	7.76739e-22	1.01702e-20	39.1129
PGAP1	2.28267	6.73098	14.2951	7.85763e-22	1.0276e-20	39.1013
PGCP	-1.20732	6.1109	-14.283	8.19839e-22	1.07006e-20	39.0586
NUP107	1.74155	6.09214	14.2828	8.20185e-22	1.07006e-20	39.0582
CCBE1	-1.93305	6.04804	-14.2759	8.40418e-22	1.09515e-20	39.0337
PTPN21	-1.61539	6.13554	-14.2753	8.42072e-22	1.096e-20	39.0318
HCN3	1.01205	5.57803	14.2703	8.56959e-22	1.11405e-20	39.0142
OIP5	1.45457	4.23807	14.2591	8.91006e-22	1.15693e-20	38.975
GFM2	1.13688	5.95461	14.258	8.94626e-22	1.16025e-20	38.9709
RAB3IP	2.15723	6.35344	14.2554	9.027e-22	1.16934e-20	38.9619
ZNF594	1.77036	4.92113	14.2523	9.1256e-22	1.18071e-20	38.951
PMM1	-1.00345	6.5653	-14.2485	9.24878e-22	1.19382e-20	38.9375
SLC9A1	-1.26225	7.04993	-14.2449	9.36462e-22	1.20735e-20	38.925
C10orf11	-1.28463	4.9111	-14.2439	9.39653e-22	1.21004e-20	38.9216
GPD1L	-1.34613	6.66629	-14.2433	9.41575e-22	1.21109e-20	38.9196
PLA1A	-1.69381	5.62446	-14.22	1.0217e-21	1.3126e-20	38.8375
POLD4	-1.07402	7.2684	-14.2053	1.07578e-21	1.38046e-20	38.7857
C1orf41	1.49265	5.33178	14.2028	1.085e-21	1.39066e-20	38.7771
WWC3	-1.04383	6.91832	-14.2002	1.09503e-21	1.40187e-20	38.7679
FAM76B	1.16343	5.37	14.1939	1.11935e-21	1.43133e-20	38.7458
NUP35	1.38026	5.21148	14.1887	1.14005e-21	1.45609e-20	38.7274
SLC39A6	1.50239	6.69351	14.1853	1.1536e-21	1.47127e-20	38.7156
ATXN7	-1.14252	7.51673	-14.1851	1.15463e-21	1.47127e-20	38.7147
FLJ14668	1.16588	6.0425	14.1832	1.16251e-21	1.4796e-20	38.7078
FLJ39660	1.26312	3.513	14.1796	1.17721e-21	1.49657e-20	38.6952
C10orf10	-2.58389	9.16996	-14.1784	1.18206e-21	1.50098e-20	38.6911
WDR57	1.02345	6.39138	14.1531	1.29157e-21	1.63813e-20	38.6021
C6orf48	1.49736	7.79873	14.1289	1.40609e-21	1.77926e-20	38.5168
HEYL	-1.12271	6.36486	-14.1247	1.42712e-21	1.80378e-20	38.5018
CD1E	-1.09966	4.34762	-14.1233	1.43444e-21	1.81094e-20	38.4967
SIRPB1	-1.99739	5.7762	-14.1144	1.4799e-21	1.86618e-20	38.4654
C5orf4	-1.67619	5.82663	-14.1107	1.49923e-21	1.88837e-20	38.4523
AXUD1	-2.82912	7.23492	-14.1096	1.50471e-21	1.8931e-20	38.4487
C7orf23	-1.2375	7.458	-14.1057	1.52571e-21	1.9173e-20	38.4347
ALG6	1.48235	4.86334	14.1013	1.54949e-21	1.94495e-20	38.4192
SHE	-1.52848	6.24866	-14.0937	1.59128e-21	1.99512e-20	38.3925
SKI	-1.21084	7.3173	-14.0838	1.6476e-21	2.06284e-20	38.3575
PCDHGC3	-1.33651	7.18148	-14.0836	1.64906e-21	2.06284e-20	38.3566
AURKB	1.37365	6.14701	14.0764	1.69113e-21	2.11304e-20	38.3313
H2AFZ	2.17525	7.4957	14.0691	1.73523e-21	2.16567e-20	38.3055
OASL	-1.04723	5.41939	-14.0654	1.75792e-21	2.18899e-20	38.2924
GGT1	-1.00464	6.57029	-14.0592	1.797e-21	2.23511e-20	38.2703
PHF15	-1.18232	6.45059	-14.0436	1.89819e-21	2.35294e-20	38.2153
CD68	-2.58706	9.22133	-14.039	1.92963e-21	2.3892e-20	38.1988
RECK	-1.1895	6.79106	-14.0344	1.96094e-21	2.42522e-20	38.1826
CHD6	1.25906	6.88637	14.0299	1.99232e-21	2.46124e-20	38.1667
P4HA2	-1.1183	7.32097	-14.0199	2.06377e-21	2.5409e-20	38.1313
C7orf24	1.66174	6.39513	14.0112	2.12824e-21	2.61733e-20	38.1004
NXF3	-1.26347	4.27139	-14.0067	2.16194e-21	2.65578e-20	38.0846
FLJ13305	2.05329	4.03852	14.0056	2.17044e-21	2.66323e-20	38.0807
PCQAP	-1.04671	7.45877	-14.0006	2.20935e-21	2.70794e-20	38.0628
FRMD5	1.29551	4.20261	13.9993	2.21938e-21	2.71719e-20	38.0583
SIAE	-1.43071	6.80437	-13.9974	2.23414e-21	2.7322e-20	38.0516
C14orf104	1.46645	4.95982	13.9952	2.25179e-21	2.75071e-20	38.0437
ETS1	-1.69039	8.32918	-13.9938	2.26247e-21	2.76067e-20	38.039
HIPK3	-1.28521	8.04387	-13.9913	2.28283e-21	2.7805e-20	38.03
PTK2B	-1.32745	6.6018	-13.9912	2.28381e-21	2.7805e-20	38.0295
CEBPB	-1.7648	7.61589	-13.9903	2.29089e-21	2.78601e-20	38.0264
SLCO2B1	-2.44294	7.83576	-13.9884	2.30657e-21	2.80196e-20	38.0196
CFTR	-1.69298	4.45477	-13.9799	2.37704e-21	2.88437e-20	37.9894
ZNF557	1.09372	4.84012	13.9746	2.42122e-21	2.93472e-20	37.9709
SLC15A2	-2.02603	6.24784	-13.9655	2.5004e-21	3.02734e-20	37.9385
CCNF	1.39393	5.31482	13.9636	2.51727e-21	3.04439e-20	37.9318
ZBTB38	-1.07804	7.49263	-13.9492	2.64901e-21	3.20018e-20	37.8805
GTPBP9	1.08323	5.91592	13.9485	2.656e-21	3.20508e-20	37.8779
CCDC112	1.07319	4.11875	13.947	2.66987e-21	3.21827e-20	37.8727
PTGES3	1.56959	9.17641	13.9439	2.69945e-21	3.24676e-20	37.8616
CCRL2	-1.89122	4.97795	-13.9344	2.79115e-21	3.34969e-20	37.828
NUDT21	1.29533	8.35389	13.9322	2.81352e-21	3.37283e-20	37.82
ACTR6	1.51725	4.69976	13.9244	2.89194e-21	3.46069e-20	37.7924
PDXK	-1.31952	7.93993	-13.9243	2.89314e-21	3.46069e-20	37.792
VASP	-1.12124	7.23591	-13.9106	3.03678e-21	3.62854e-20	37.7433
C6orf170	1.54209	4.33242	13.9065	3.08076e-21	3.67034e-20	37.7289
GLI3	-1.16083	4.88054	-13.9065	3.08115e-21	3.67034e-20	37.7287
GIMAP7	-1.89111	6.53661	-13.9064	3.08183e-21	3.67034e-20	37.7285
PRX	-1.08012	6.21369	-13.9015	3.13555e-21	3.73025e-20	37.7112
CCNB1IP1	1.47229	5.9702	13.8971	3.18492e-21	3.78487e-20	37.6955
OCIAD2	1.44136	6.10735	13.8926	3.2362e-21	3.84163e-20	37.6794
ZNF776	1.50868	6.11823	13.8847	3.32811e-21	3.94645e-20	37.6513
ATXN1	-1.3176	6.36263	-13.8825	3.35391e-21	3.97273e-20	37.6435
SIPA1	-1.13762	6.67887	-13.8812	3.36998e-21	3.98744e-20	37.6387
HPCAL1	-1.75281	8.23069	-13.8651	3.56807e-21	4.21271e-20	37.5814
C3	-3.79824	8.89728	-13.8589	3.64769e-21	4.29744e-20	37.5592
PRF1	-2.12632	7.05218	-13.8518	3.74068e-21	4.40225e-20	37.5339
HPRT1	2.06374	6.54747	13.8279	4.0714e-21	4.7863e-20	37.4488
PTPLA	-1.02494	5.38148	-13.8178	4.21926e-21	4.94948e-20	37.413
FAM107A	-2.20224	7.36333	-13.8146	4.26795e-21	5.00123e-20	37.4015
CD82	-2.079	7.96491	-13.8079	4.37131e-21	5.10474e-20	37.3774
SLC25A14	1.39324	4.83914	13.8076	4.37495e-21	5.10474e-20	37.3766
RAC2	-1.96476	7.50923	-13.8056	4.40648e-21	5.13604e-20	37.3694
PARVG	-1.59223	6.42728	-13.8047	4.42156e-21	5.14813e-20	37.3659
ZNF253	1.4527	4.94406	13.7941	4.59099e-21	5.33971e-20	37.3282
WHSC1	1.28356	6.39897	13.7919	4.62731e-21	5.37624e-20	37.3203
ZBED2	-1.10436	5.76202	-13.7863	4.71985e-21	5.47793e-20	37.3004
PUM2	1.00352	8.75108	13.7838	4.76121e-21	5.52008e-20	37.2916
ADRA1A	-1.37805	4.73158	-13.7631	5.12599e-21	5.93042e-20	37.2174
HCLS1	-2.20921	7.16225	-13.7357	5.65158e-21	6.53158e-20	37.1194
HIST1H2AG	1.75716	5.85775	13.7347	5.67214e-21	6.54842e-20	37.1158
HIST1H1C	1.84173	6.73775	13.7276	5.81723e-21	6.70884e-20	37.0904
WASF2	-1.1442	7.26585	-13.7176	6.02689e-21	6.94331e-20	37.0548
CHN2	1.95303	6.00645	13.7133	6.12043e-21	7.04365e-20	37.0393
CASKIN2	-1.3512	6.70281	-13.7126	6.13732e-21	7.05565e-20	37.0366
ARHGAP26	-1.30593	6.30192	-13.7093	6.20887e-21	7.13042e-20	37.0249
PGBD1	1.10668	4.48227	13.7048	6.30907e-21	7.23788e-20	37.0089
GPR124	-1.13374	6.61603	-13.7013	6.38876e-21	7.31396e-20	36.9962
ASF1B	2.51187	5.66776	13.7006	6.40509e-21	7.32498e-20	36.9937
RNASE4	-1.60053	6.03046	-13.6969	6.48989e-21	7.4142e-20	36.9805
FASTKD1	1.253	5.14218	13.6932	6.57563e-21	7.50431e-20	36.9673
RAD54B	1.72693	4.08553	13.6917	6.61094e-21	7.52889e-20	36.9619
PLA2R1	-1.19422	4.83894	-13.6883	6.69221e-21	7.61352e-20	36.9496
BRI3	-1.14919	8.68382	-13.6847	6.77815e-21	7.70327e-20	36.9368
BRCA2	1.15849	3.72303	13.6826	6.82878e-21	7.74472e-20	36.9293
HCST	-2.36606	7.25188	-13.6772	6.96321e-21	7.88696e-20	36.9098
C10orf116	-1.8332	7.03285	-13.6769	6.96863e-21	7.88696e-20	36.909
ACYP1	1.27188	5.51122	13.6725	7.08062e-21	7.99715e-20	36.893
CHD1L	1.05829	6.41681	13.6533	7.58247e-21	8.55512e-20	36.8242
PUS7L	1.19225	4.94362	13.6483	7.71934e-21	8.70057e-20	36.8062
ZBTB16	-2.9844	7.31506	-13.6468	7.7613e-21	8.73886e-20	36.8008
C6orf151	1.42711	5.58839	13.6449	7.81341e-21	8.78848e-20	36.7941
ARRB2	-1.41333	7.8879	-13.6354	8.08262e-21	9.08194e-20	36.76
CENPH	1.48146	3.59048	13.6255	8.37381e-21	9.39948e-20	36.7245
ABCB7	1.31503	6.04459	13.6113	8.81077e-21	9.86969e-20	36.6734
PRNP	-1.18448	8.87585	-13.6001	9.17341e-21	1.02549e-19	36.6329
NUP205	1.44764	7.0116	13.5845	9.69934e-21	1.08318e-19	36.5769
PRDX5	-1.11514	8.93813	-13.5811	9.81649e-21	1.09514e-19	36.5648
CEP57	1.3929	5.91974	13.5781	9.92281e-21	1.10587e-19	36.554
C6orf55	1.16846	6.09427	13.5738	1.00775e-20	1.12197e-19	36.5385
FAM82C	-1.07513	7.39767	-13.5625	1.04936e-20	1.16711e-19	36.4978
PI16	-1.2669	5.88383	-13.5617	1.05247e-20	1.16938e-19	36.4948
C1orf9	1.10664	6.18686	13.5613	1.05408e-20	1.16998e-19	36.4933
CDC5L	1.20132	6.55777	13.5528	1.08678e-20	1.20383e-19	36.4626
FANCC	1.21472	5.22649	13.549	1.10164e-20	1.21905e-19	36.449
GABARAPL1	-1.38635	6.93979	-13.5473	1.10832e-20	1.22521e-19	36.4429
FLJ20628	1.46698	5.33048	13.5205	1.2201e-20	1.34605e-19	36.3464
SLC43A2	-1.38914	7.40899	-13.5198	1.22306e-20	1.34796e-19	36.344
SMS	1.37168	8.46526	13.5129	1.25392e-20	1.38058e-19	36.3189
ZNF93	1.75043	4.57781	13.5104	1.26524e-20	1.39163e-19	36.3099
PCSK1	3.20061	4.49086	13.5093	1.27001e-20	1.39548e-19	36.3061
SNORD27	2.40818	3.69798	13.5064	1.28352e-20	1.40891e-19	36.2955
C13orf27	2.03189	3.4492	13.505	1.28977e-20	1.41435e-19	36.2906
CAV1	-3.28266	8.4937	-13.4982	1.32186e-20	1.44809e-19	36.2659
HIST1H4A	2.1793	4.67208	13.497	1.32739e-20	1.45269e-19	36.2617
WNT2	-1.31406	5.0684	-13.4779	1.42189e-20	1.55455e-19	36.1927
RAD51C	1.14686	5.4656	13.4722	1.45146e-20	1.58529e-19	36.172
PGDS	-2.22884	5.27238	-13.4584	1.52532e-20	1.6643e-19	36.1221
RHOF	-1.47449	5.9498	-13.4574	1.53066e-20	1.66847e-19	36.1186
HACE1	1.31555	6.36013	13.4516	1.56298e-20	1.702e-19	36.0976
hCG_1789710	1.28598	4.04046	13.4432	1.61119e-20	1.75275e-19	36.0671
ANP32E	1.97392	6.12284	13.439	1.63552e-20	1.77745e-19	36.0521
F11	-1.37463	4.53834	-13.4345	1.66211e-20	1.80276e-19	36.0359
SNRPA	1.09646	6.71954	13.4313	1.68159e-20	1.82028e-19	36.0242
CENPJ	1.43657	4.71214	13.4277	1.7037e-20	1.84239e-19	36.0111
ChGn	-1.5249	5.50245	-13.4237	1.72817e-20	1.86701e-19	35.9967
FSD1L	1.43024	3.82575	13.4197	1.75341e-20	1.89241e-19	35.9822
AFAP1L1	-1.1377	5.84404	-13.412	1.80257e-20	1.94354e-19	35.9544
RASIP1	-1.20611	5.90008	-13.4104	1.81289e-20	1.95274e-19	35.9487
ATP8A2	3.09745	4.4557	13.4098	1.81705e-20	1.9553e-19	35.9464
WDR67	1.45222	4.90549	13.4068	1.83706e-20	1.97489e-19	35.9354
RBP4	-1.54693	5.63546	-13.4039	1.85629e-20	1.99359e-19	35.9249
ZNF85	1.02268	5.30684	13.396	1.90953e-20	2.04675e-19	35.8965
HIG2	1.72893	6.13268	13.3852	1.98556e-20	2.12616e-19	35.8573
PDGFRB	-1.77755	7.53431	-13.3842	1.99248e-20	2.13149e-19	35.8538
FXR1	1.39915	8.3555	13.3833	1.9995e-20	2.1369e-19	35.8503
C6orf173	1.90475	3.90378	13.3632	2.14936e-20	2.29482e-19	35.7777
FAM83D	1.39955	5.73004	13.3625	2.15515e-20	2.29876e-19	35.775
ATHL1	-1.49533	6.62147	-13.3567	2.20055e-20	2.3449e-19	35.754
ADAM9	-1.00459	8.4413	-13.3519	2.23936e-20	2.38161e-19	35.7365
C14orf156	1.29438	8.85577	13.3465	2.28318e-20	2.42585e-19	35.717
HIST3H2A	2.7911	5.70725	13.3394	2.34259e-20	2.48415e-19	35.6912
XPOT	1.47849	7.13796	13.3323	2.40322e-20	2.54597e-19	35.6655
USP37	1.29823	5.6037	13.3207	2.50602e-20	2.65231e-19	35.6235
FSTL3	-1.60492	6.86719	-13.317	2.53972e-20	2.68278e-19	35.61
P2RX1	-1.17139	5.70628	-13.3146	2.56274e-20	2.70202e-19	35.601
ADRB1	-1.55482	7.31297	-13.3145	2.56288e-20	2.70202e-19	35.6009
PSIP1	2.03347	6.17052	13.3133	2.5745e-20	2.71166e-19	35.5964
RASSF5	-1.6307	6.90453	-13.2997	2.70453e-20	2.84587e-19	35.5469
RAB39	2.38532	4.17877	13.2834	2.86873e-20	3.01576e-19	35.4877
ZNF543	1.01589	5.50312	13.28	2.90412e-20	3.05002e-19	35.4754
FLJ14803	1.71638	7.00784	13.2718	2.99114e-20	3.13239e-19	35.4457
SNAP91	2.05751	4.11631	13.2628	3.09127e-20	3.23106e-19	35.4127
CCDC123	1.21004	6.00749	13.2587	3.13757e-20	3.27632e-19	35.3977
C6orf182	1.35314	4.28381	13.2583	3.14172e-20	3.27752e-19	35.3964
ZZZ3	1.1525	6.71857	13.2504	3.23305e-20	3.36959e-19	35.3676
ZNF184	1.31731	5.13247	13.2491	3.24787e-20	3.3818e-19	35.363
CEP152	1.9532	4.34101	13.248	3.26103e-20	3.39228e-19	35.359
GRIK3	2.08359	5.24063	13.2367	3.39794e-20	3.53134e-19	35.3177
ETAA1	1.32182	5.79999	13.2138	3.69146e-20	3.8291e-19	35.2344
GNA14	-1.65115	5.81328	-13.1994	3.89034e-20	4.03157e-19	35.1817
CHML	1.65423	6.03436	13.1977	3.91469e-20	4.05296e-19	35.1755
SNORD56	2.29096	4.46779	13.196	3.9377e-20	4.07293e-19	35.1696
ZNF273	1.39246	4.76394	13.1899	4.02688e-20	4.16124e-19	35.1471
GAS2L3	1.89302	5.90124	13.1866	4.07495e-20	4.20693e-19	35.1352
GNLY	-1.58572	6.099	-13.1696	4.33476e-20	4.46672e-19	35.0731
P15RS	1.47153	7.39083	13.1634	4.43373e-20	4.56441e-19	35.0504
HLA-DOA	-1.67385	6.84783	-13.1607	4.47805e-20	4.60569e-19	35.0404
PSAT1	1.93123	5.58262	13.1562	4.55119e-20	4.67652e-19	35.0242
VAMP5	-1.31876	7.27172	-13.1556	4.56092e-20	4.68212e-19	35.022
ZNF92	1.13658	4.51885	13.1453	4.73556e-20	4.85229e-19	34.9843
FCER1G	-2.87897	7.9852	-13.141	4.80941e-20	4.92334e-19	34.9687
HEBP1	-1.16312	6.72759	-13.1406	4.81702e-20	4.92652e-19	34.9672
ZHX2	-1.10853	6.45608	-13.1393	4.84009e-20	4.94548e-19	34.9624
SLC7A7	-2.42029	6.73572	-13.1223	5.14796e-20	5.25515e-19	34.9004
ZNF695	1.0237	4.30392	13.1114	5.35783e-20	5.46429e-19	34.8603
USP53	-1.74168	7.20509	-13.1107	5.37049e-20	5.4721e-19	34.8579
CNOT7	1.06525	7.75272	13.0928	5.73177e-20	5.82934e-19	34.7925
PPL	-1.15118	5.82128	-13.0905	5.78144e-20	5.8744e-19	34.7839
PCDHB10	1.76375	5.45216	13.0802	6.00309e-20	6.09394e-19	34.7461
NUDCD1	1.18366	6.07523	13.077	6.07321e-20	6.15941e-19	34.7344
CASP1	-1.63097	5.53138	-13.0737	6.14581e-20	6.2215e-19	34.7225
APOL3	-1.60378	6.44371	-13.0711	6.20428e-20	6.26908e-19	34.713
ABCC3	-1.50932	5.91507	-13.0695	6.24061e-20	6.29996e-19	34.7071
ZW10	1.07762	5.25667	13.0581	6.5061e-20	6.55587e-19	34.6653
C14orf101	1.16271	6.09685	13.0505	6.68963e-20	6.7284e-19	34.6373
FANCL	2.22421	5.70256	13.0484	6.74109e-20	6.77393e-19	34.6296
hCG_17955	1.19546	8.34376	13.0316	7.16616e-20	7.18785e-19	34.5682
WASF1	2.17035	4.44971	13.0284	7.2508e-20	7.26609e-19	34.5564
SLC19A1	-1.0093	6.74214	-13.0251	7.33852e-20	7.34053e-19	34.5443
C1orf82	1.40997	5.49054	13.022	7.42331e-20	7.41856e-19	34.5328
RAD51	1.48651	3.9718	13.021	7.44978e-20	7.43821e-19	34.5292
WISP2	-1.30656	6.82933	-13.0183	7.52292e-20	7.50439e-19	34.5194
ADAMTS9	-2.15958	5.91587	-13.0074	7.83103e-20	7.79751e-19	34.4791
RNF182	2.50073	5.78557	13.0068	7.84706e-20	7.80636e-19	34.4771
NUCB1	-1.31135	8.57867	-13.0037	7.93785e-20	7.88233e-19	34.4655
FAM26B	-1.00638	7.0334	-12.9909	8.3155e-20	8.24237e-19	34.4188
PCDH17	-1.55105	6.60954	-12.9885	8.39012e-20	8.3088e-19	34.4099
CD1C	-1.05068	4.34135	-12.9879	8.40979e-20	8.32074e-19	34.4075
AKR1C3	-1.83656	5.0517	-12.9817	8.60219e-20	8.48806e-19	34.3848
PAK1IP1	1.20724	5.74114	12.9774	8.73677e-20	8.60533e-19	34.3692
CD4	-1.69159	7.25143	-12.9724	8.90017e-20	8.75837e-19	34.3506
ZNF627	1.22431	5.85162	12.972	8.91108e-20	8.76122e-19	34.3494
HIST1H3C	4.43206	7.20861	12.9605	9.29725e-20	9.13269e-19	34.3067
C2orf44	1.4493	4.97686	12.9554	9.4691e-20	9.29315e-19	34.2884
C14orf2	1.36983	6.05509	12.953	9.55464e-20	9.36869e-19	34.2793
SLIT2	-2.18004	7.95776	-12.9507	9.63406e-20	9.4381e-19	34.271
APBB1IP	-1.71956	5.78451	-12.9418	9.95357e-20	9.72496e-19	34.2382
C17orf42	1.04343	4.51212	12.94	1.0021e-19	9.78212e-19	34.2315
ACOXL	-1.52146	5.71233	-12.9336	1.02572e-19	1.00038e-18	34.2081
HMHA1	-1.21578	6.44505	-12.9291	1.04272e-19	1.01591e-18	34.1916
CACNA2D1	2.72181	5.77681	12.9289	1.0435e-19	1.01591e-18	34.1908
CIB1	-1.06008	6.8462	-12.9233	1.06515e-19	1.03606e-18	34.1702
PODN	-1.80749	7.1229	-12.9163	1.09308e-19	1.06228e-18	34.1442
PFKFB3	-1.97977	7.79995	-12.9124	1.10892e-19	1.07576e-18	34.1297
FLJ42117	1.45511	3.93193	12.9115	1.11238e-19	1.07816e-18	34.1266
SEP4	-1.01893	6.36027	-12.9053	1.13806e-19	1.10207e-18	34.1037
CSTF3	1.67654	7.74899	12.9018	1.15254e-19	1.11511e-18	34.091
ANKRD1	-3.17304	5.97974	-12.8925	1.19251e-19	1.14971e-18	34.0568
PIGR	-3.56661	8.69484	-12.8866	1.21901e-19	1.17423e-18	34.0347
HIST1H2AC	1.6198	9.38249	12.8817	1.24092e-19	1.19428e-18	34.0168
CEP76	1.29468	4.15629	12.8786	1.25506e-19	1.20683e-18	34.0054
ONECUT2	1.82261	3.78968	12.8723	1.28444e-19	1.23398e-18	33.9822
PHF16	1.47066	5.59092	12.8614	1.3368e-19	1.28266e-18	33.9421
RGS2	-2.2596	7.23969	-12.8613	1.33745e-19	1.28266e-18	33.9416
ZNF223	1.19244	3.68552	12.8607	1.34052e-19	1.28448e-18	33.9393
C1RL	-1.19409	6.34906	-12.8598	1.34511e-19	1.28775e-18	33.9358
FBXO43	1.42361	3.5241	12.8543	1.3726e-19	1.31177e-18	33.9155
PMS2L1	1.07551	7.50286	12.8537	1.37537e-19	1.31327e-18	33.9135
YPEL1	1.41088	5.93547	12.8489	1.39965e-19	1.33529e-18	33.8959
OCRL	1.18668	6.05659	12.8471	1.40917e-19	1.3432e-18	33.8891
GRAP2	-1.48785	5.41091	-12.8436	1.42724e-19	1.35924e-18	33.8763
PML	-1.17152	6.91758	-12.8395	1.44886e-19	1.37862e-18	33.8612
GBP4	-2.53801	6.67407	-12.8357	1.46948e-19	1.39582e-18	33.847
PTAFR	-2.11942	6.66974	-12.8326	1.48627e-19	1.41054e-18	33.8356
ZNF611	1.13316	5.90773	12.8239	1.53478e-19	1.45405e-18	33.8034
HFM1	1.01496	2.89724	12.8206	1.55327e-19	1.46902e-18	33.7913
PROX1	2.65926	5.12626	12.8164	1.57734e-19	1.4905e-18	33.7759
ZRANB3	1.49368	4.09886	12.798	1.68819e-19	1.59112e-18	33.7077
AOX1	-1.7531	5.02365	-12.7944	1.71093e-19	1.61116e-18	33.6942
ZNF66	1.54856	5.38256	12.7805	1.80032e-19	1.69242e-18	33.6431
GRP	2.83755	5.86797	12.7725	1.85473e-19	1.74207e-18	33.6132
ANXA8	-1.6435	7.5376	-12.7637	1.91536e-19	1.79594e-18	33.5809
PRTFDC1	2.37096	5.50746	12.7543	1.98348e-19	1.85822e-18	33.5458
C3orf26	1.08262	5.37396	12.7539	1.98624e-19	1.85921e-18	33.5444
WDR53	1.1687	5.42226	12.7442	2.05874e-19	1.92378e-18	33.5084
SMARCC1	1.03023	7.64439	12.7416	2.07801e-19	1.94013e-18	33.499
RBL1	1.98057	5.70313	12.7318	2.15477e-19	2.00665e-18	33.4626
OGFR	-1.12645	7.87282	-12.7269	2.1943e-19	2.04172e-18	33.4444
GANC	-1.23106	6.78436	-12.7162	2.28294e-19	2.12059e-18	33.4046
ATP5S	1.04132	6.47859	12.7126	2.31328e-19	2.14331e-18	33.3913
CEP170	1.05428	6.25423	12.7109	2.32756e-19	2.15471e-18	33.3852
CCDC45	1.25198	6.11517	12.6959	2.46052e-19	2.27203e-18	33.3294
GATA2	-1.14299	6.06622	-12.6928	2.48865e-19	2.29607e-18	33.318
EVI1	-1.83344	6.22178	-12.6828	2.58251e-19	2.38066e-18	33.2808
CDCA7	2.16086	5.0487	12.6675	2.73237e-19	2.51034e-18	33.2241
CES1	-3.41476	9.26861	-12.6535	2.87743e-19	2.63917e-18	33.1722
RNF128	-1.66558	4.8916	-12.6506	2.90945e-19	2.66631e-18	33.1611
HSD17B6	-2.00092	6.62274	-12.6461	2.95764e-19	2.70683e-18	33.1446
PHACTR2	-1.60249	6.20397	-12.646	2.95862e-19	2.70683e-18	33.1442
C4orf30	1.29766	6.72953	12.6427	2.99555e-19	2.73832e-18	33.1318
ZDHHC15	1.62386	5.0876	12.6397	3.02855e-19	2.76618e-18	33.1208
OLFML2A	-1.02075	6.48596	-12.635	3.08219e-19	2.81282e-18	33.1032
AADACL1	-1.87196	6.72907	-12.6326	3.10981e-19	2.83566e-18	33.0942
APOD	-2.04584	7.87631	-12.6226	3.22707e-19	2.94013e-18	33.057
ZNF525	1.43031	4.60275	12.617	3.294e-19	2.99362e-18	33.0364
CLDN5	-1.90802	8.04513	-12.6135	3.33686e-19	3.03006e-18	33.0234
POLB	1.20438	5.28971	12.6071	3.41719e-19	3.10043e-18	32.9996
FPR1	-2.06985	6.15407	-12.594	3.58699e-19	3.24416e-18	32.9509
PALB2	1.05785	5.47037	12.594	3.58748e-19	3.24416e-18	32.9507
ABCC6	-1.48568	5.75901	-12.5931	3.59948e-19	3.25233e-18	32.9474
VAT1	-1.2831	8.14326	-12.5901	3.63974e-19	3.28328e-18	32.9362
PARD3B	-1.07406	5.84075	-12.5897	3.64457e-19	3.28389e-18	32.9349
CHP	-1.42869	9.01634	-12.5896	3.64644e-19	3.28389e-18	32.9343
C14orf106	1.4391	5.02903	12.586	3.69557e-19	3.32267e-18	32.9209
FGF2	-1.15161	6.66362	-12.5858	3.69864e-19	3.3227e-18	32.9201
PSMD10	1.20897	6.30872	12.5847	3.71369e-19	3.33348e-18	32.916
PLEKHA2	-1.62811	7.56325	-12.5822	3.74798e-19	3.35599e-18	32.9068
RIC8B	1.09841	6.41651	12.5789	3.79401e-19	3.39443e-18	32.8945
SNORA5A	1.9086	4.99354	12.5785	3.79941e-19	3.39648e-18	32.8931
ZNF221	1.29087	4.35756	12.5631	4.02276e-19	3.59321e-18	32.8357
ZKSCAN2	1.06706	4.48087	12.558	4.09978e-19	3.65496e-18	32.8167
ZNF345	1.44662	4.17058	12.5475	4.26328e-19	3.78639e-18	32.7774
RBM41	1.41873	5.4486	12.546	4.28723e-19	3.80457e-18	32.7718
HECW2	-1.66744	6.4044	-12.5431	4.33388e-19	3.84049e-18	32.7609
RAB27A	-1.49184	7.32927	-12.543	4.33474e-19	3.84049e-18	32.7607
C6orf162	1.16756	6.5104	12.5412	4.36493e-19	3.86411e-18	32.7537
ZNF461	1.19296	4.68986	12.5181	4.75453e-19	4.2022e-18	32.6679
PPP1R14A	-1.73168	6.7997	-12.5133	4.8416e-19	4.27225e-18	32.6497
GAB1	-1.56125	7.46055	-12.5033	5.02452e-19	4.43009e-18	32.6124
SH3BGRL3	-1.54632	7.9308	-12.4899	5.28019e-19	4.64801e-18	32.5626
SLA	-2.01909	6.61195	-12.4861	5.35586e-19	4.70704e-18	32.5483
RAD18	1.13981	5.71486	12.4717	5.65029e-19	4.94989e-18	32.4946
FAM46B	-1.27534	6.03618	-12.4637	5.82197e-19	5.09621e-18	32.4645
RBBP8	1.85518	5.82426	12.4514	6.09531e-19	5.32269e-18	32.4185
PLAC9	-1.07361	5.07252	-12.4478	6.17797e-19	5.39057e-18	32.4049
VASN	-1.26279	6.1369	-12.4226	6.78661e-19	5.91219e-18	32.3106
CENTD2	-1.47915	7.64089	-12.4212	6.82179e-19	5.9381e-18	32.3054
POLR3F	1.22296	5.4426	12.4143	6.99965e-19	6.08808e-18	32.2795
WDR17	1.42297	4.40629	12.4076	7.17574e-19	6.23628e-18	32.2546
SLC1A4	1.15816	5.77758	12.4048	7.25145e-19	6.29707e-18	32.2441
C10orf37	1.37199	3.8097	12.3988	7.41724e-19	6.43593e-18	32.2214
C7orf11	1.06104	6.53214	12.3944	7.53992e-19	6.53719e-18	32.2049
C5orf23	-1.81271	5.2027	-12.3818	7.90068e-19	6.83912e-18	32.158
ZNF473	1.04087	4.74691	12.3788	7.99235e-19	6.913e-18	32.1464
PLAT	-1.44651	6.66293	-12.3709	8.22973e-19	7.1127e-18	32.117
SNHG6	1.75084	6.20291	12.3692	8.28394e-19	7.1539e-18	32.1104
RMND5A	1.27356	6.74527	12.3676	8.33327e-19	7.19082e-18	32.1044
FLJ36166	1.09851	4.29015	12.3598	8.57813e-19	7.39627e-18	32.0754
PSCD4	-1.72097	6.70217	-12.3495	8.9147e-19	7.66229e-18	32.0367
FLJ10781	1.02522	4.84036	12.3492	8.92547e-19	7.66553e-18	32.0355
C12orf32	1.04771	6.19421	12.3453	9.05574e-19	7.77131e-18	32.021
ARID5A	-1.36427	6.87393	-12.3307	9.56552e-19	8.18949e-18	31.966
HIST1H4C	2.10333	7.31409	12.3274	9.68251e-19	8.28317e-18	31.9538
ASCL1	5.12989	5.34281	12.3121	1.02546e-18	8.75885e-18	31.8961
C19orf2	1.04049	7.45218	12.3117	1.0271e-18	8.76601e-18	31.8945
ZNF124	1.40711	6.51447	12.3071	1.0447e-18	8.90933e-18	31.8775
C7orf41	1.25851	7.60825	12.3019	1.06543e-18	9.07897e-18	31.8577
FLJ14213	-1.79303	6.11053	-12.3009	1.06927e-18	9.1046e-18	31.8541
ZNF33B	1.22248	5.40347	12.2927	1.10255e-18	9.38071e-18	31.8233
EXOSC3	1.38783	6.24216	12.2916	1.1072e-18	9.41295e-18	31.8191
ZNF545	1.62797	5.03456	12.2906	1.11152e-18	9.44232e-18	31.8152
hCG_1981635	-1.3814	5.1019	-12.2826	1.14536e-18	9.71471e-18	31.7851
PTGDR	-1.11619	4.86794	-12.2805	1.15431e-18	9.77539e-18	31.7773
CCDC52	1.05766	5.14055	12.28	1.15664e-18	9.78755e-18	31.7753
PDK1	1.60995	6.52004	12.2613	1.24026e-18	1.04789e-17	31.7052
ZNF565	1.0414	4.26134	12.2599	1.24701e-18	1.05198e-17	31.6997
AMPH	1.96582	4.75183	12.2559	1.26594e-18	1.06712e-17	31.6846
REL	-1.41631	6.54849	-12.254	1.27486e-18	1.07298e-17	31.6776
ZNF121	1.00027	6.26074	12.2517	1.28566e-18	1.08124e-17	31.6691
FLJ22662	-2.40073	6.57242	-12.2512	1.28822e-18	1.08256e-17	31.6671
ARHGEF6	-2.02701	6.56947	-12.2203	1.44697e-18	1.21317e-17	31.5504
FLJ21908	1.25938	4.71288	12.2107	1.50008e-18	1.25673e-17	31.5142
CNIH2	1.05503	5.79522	12.2088	1.51027e-18	1.2643e-17	31.5074
ACTN1	-1.13766	8.21287	-12.2077	1.51685e-18	1.26873e-17	31.5031
HRASLS3	-1.85926	7.03035	-12.2075	1.51789e-18	1.26873e-17	31.5024
PFDN4	1.34297	3.74948	12.2065	1.52375e-18	1.27266e-17	31.4985
PJA1	1.16639	6.12301	12.206	1.52637e-18	1.27326e-17	31.4968
APOL1	-1.85936	6.44532	-12.206	1.5268e-18	1.27326e-17	31.4965
RHBDL3	1.20203	4.68756	12.2034	1.54151e-18	1.28357e-17	31.4869
ZNF137	1.04754	3.16416	12.2023	1.54817e-18	1.28747e-17	31.4825
HINT1	1.0785	7.51949	12.2022	1.54854e-18	1.28747e-17	31.4823
SNF1LK	-1.62588	7.51724	-12.2013	1.55342e-18	1.28956e-17	31.4791
C13orf34	1.34351	4.09838	12.1987	1.56881e-18	1.30135e-17	31.4692
C5orf13	1.75514	7.58513	12.1924	1.60649e-18	1.33058e-17	31.4454
PYCARD	-1.47296	6.67764	-12.1798	1.68449e-18	1.39308e-17	31.3978
PSMA2	1.09196	6.00811	12.1788	1.69061e-18	1.39709e-17	31.3942
BXDC2	1.44831	5.95163	12.1719	1.73557e-18	1.43207e-17	31.3678
CMTM8	-1.00182	6.85826	-12.1704	1.745e-18	1.43877e-17	31.3624
HDC	-1.5018	4.9976	-12.1696	1.75057e-18	1.44227e-17	31.3592
ABLIM1	-1.43724	7.38528	-12.1562	1.84111e-18	1.51459e-17	31.3086
ZNF625	1.07092	4.70735	12.1496	1.8873e-18	1.55141e-17	31.2837
CDKN2A	2.47936	5.89938	12.1455	1.91614e-18	1.57394e-17	31.2685
ZNF17	1.05154	5.12778	12.1439	1.92771e-18	1.58225e-17	31.2624
USP14	1.09991	6.6587	12.1436	1.93037e-18	1.58325e-17	31.261
C4orf19	-1.26173	4.60474	-12.1368	1.98055e-18	1.62319e-17	31.2353
RAD1	1.04761	6.52464	12.1324	2.01361e-18	1.64905e-17	31.2186
WTIP	-1.00194	6.94691	-12.1172	2.13195e-18	1.74205e-17	31.1613
ZNF519	1.58253	3.73454	12.1154	2.14635e-18	1.7525e-17	31.1545
UNQ5783	-2.27572	6.1229	-12.1016	2.26136e-18	1.84503e-17	31.1021
ABI3	-1.17611	6.4841	-12.0986	2.28712e-18	1.86466e-17	31.0908
PLA2G1B	-1.76649	6.03523	-12.0983	2.28952e-18	1.86523e-17	31.0897
CASP10	-1.43699	5.14218	-12.0969	2.30186e-18	1.87388e-17	31.0843
SLC27A3	-1.19681	7.52399	-12.0833	2.42299e-18	1.96372e-17	31.0328
UNQ473	-2.39671	7.87631	-12.0801	2.45208e-18	1.98582e-17	31.0209
FAM129A	-1.67727	6.84094	-12.0742	2.50713e-18	2.0289e-17	30.9986
CKS1B	1.9537	7.5443	12.0736	2.51282e-18	2.032e-17	30.9963
NUPL2	1.08917	5.14894	12.0591	2.65424e-18	2.14161e-17	30.9413
ZC3H8	1.25872	5.75094	12.0523	2.72278e-18	2.19367e-17	30.9157
SNORA5C	1.38843	5.26695	12.0482	2.76615e-18	2.22697e-17	30.8999
CDCA7L	1.93398	6.85342	12.0472	2.77608e-18	2.23332e-17	30.8963
SMARCAD1	1.36417	5.86761	12.0321	2.93868e-18	2.36066e-17	30.8391
PRG4	-2.46116	5.13629	-12.0318	2.94194e-18	2.36155e-17	30.838
RHOU	-1.04525	7.17696	-12.028	2.98484e-18	2.39422e-17	30.8235
ZNF286A	2.07079	5.79825	12.0266	3.00101e-18	2.40543e-17	30.8181
RASL11A	-1.04699	5.21777	-12.0264	3.00353e-18	2.40569e-17	30.8172
CD74	-2.4468	10.3278	-12.0218	3.05572e-18	2.44212e-17	30.7999
ATR	1.03014	5.36832	12.0211	3.06427e-18	2.44716e-17	30.7971
QSCN6	-1.8002	8.46902	-12.0207	3.06886e-18	2.44904e-17	30.7956
GPR89A	1.23842	6.82391	12.0198	3.07938e-18	2.45565e-17	30.7922
PDPN	-1.65115	7.17541	-12.0164	3.11883e-18	2.48529e-17	30.7794
ZFP14	1.18639	3.90261	12.0149	3.13608e-18	2.49722e-17	30.7739
GDI1	1.05149	8.90212	12.0123	3.16676e-18	2.51798e-17	30.7641
CLTCL1	1.53915	5.16473	12.0118	3.17316e-18	2.52123e-17	30.7621
PDK4	-2.62546	8.21571	-11.9969	3.35737e-18	2.66566e-17	30.7054
CARD6	-1.53833	5.45221	-11.995	3.38209e-18	2.68139e-17	30.698
HEPH	-1.20754	5.02938	-11.9947	3.38491e-18	2.68168e-17	30.6972
FLJ13195	1.03047	5.87324	11.9933	3.4039e-18	2.69283e-17	30.6916
BTK	-1.68223	5.42991	-11.9906	3.43856e-18	2.71827e-17	30.6814
ARSI	-1.07789	4.41829	-11.9845	3.51788e-18	2.77897e-17	30.6585
ABHD10	1.22458	6.13947	11.9811	3.56443e-18	2.81372e-17	30.6453
EXOSC8	1.13331	5.2979	11.9782	3.60395e-18	2.84285e-17	30.6343
SNORD29	1.56298	6.90274	11.9652	3.78462e-18	2.98107e-17	30.5852
ZMAT4	2.49408	4.54603	11.954	3.94888e-18	3.10822e-17	30.5425
C14orf135	1.29324	6.52672	11.9436	4.10707e-18	3.22577e-17	30.5031
ARHGEF17	-1.22123	6.44753	-11.9397	4.16915e-18	3.27217e-17	30.488
HN1	1.37236	6.99991	11.9365	4.21971e-18	3.3071e-17	30.4759
CASP4	-1.87208	7.3631	-11.9262	4.38758e-18	3.4362e-17	30.4368
POLR2L	-1.02817	8.05135	-11.9132	4.60934e-18	3.60214e-17	30.3873
ZNF397	1.07641	5.29729	11.9104	4.6584e-18	3.63528e-17	30.3766
ALDH1A2	-1.14588	4.62157	-11.9084	4.694e-18	3.66045e-17	30.369
C18orf24	1.44138	3.22645	11.8995	4.85543e-18	3.77556e-17	30.335
FAM78A	-1.18401	5.69755	-11.8893	5.04686e-18	3.91884e-17	30.2962
ZNF572	1.08547	3.99021	11.8889	5.05548e-18	3.92275e-17	30.2945
SLC44A2	-1.14772	9.00288	-11.8836	5.15723e-18	3.9932e-17	30.2745
RHBDF2	-1.08614	5.65033	-11.8681	5.46955e-18	4.22903e-17	30.2155
RBMX2	1.12484	6.82068	11.8625	5.58713e-18	4.31081e-17	30.1941
GAA	-1.30654	7.10105	-11.8575	5.69558e-18	4.39138e-17	30.1748
RAD21	1.34742	8.13644	11.852	5.81479e-18	4.47698e-17	30.1541
SLC38A1	1.83701	7.78919	11.8449	5.97283e-18	4.59219e-17	30.1271
ARG2	1.92204	5.1649	11.8401	6.08414e-18	4.67448e-17	30.1086
PMS2	1.03201	6.20832	11.835	6.20216e-18	4.75847e-17	30.0893
ZNF711	2.66616	5.13481	11.8241	6.46556e-18	4.95013e-17	30.0476
ACSS2	-1.41111	6.87841	-11.8222	6.51213e-18	4.98231e-17	30.0404
AEBP1	-1.59233	7.81369	-11.8213	6.53485e-18	4.9927e-17	30.0369
7A5	-2.10539	5.90865	-11.8187	6.60058e-18	5.0394e-17	30.0268
HMGN2	1.0404	8.60787	11.8126	6.75414e-18	5.15303e-17	30.0037
SLC40A1	-1.85758	8.69202	-11.8108	6.80213e-18	5.18603e-17	29.9966
C14orf129	1.23707	6.04145	11.8001	7.0829e-18	5.38508e-17	29.956
FOXO1A	-1.18233	7.71764	-11.7788	7.68287e-18	5.82099e-17	29.8744
PSD4	-1.03379	6.08805	-11.7776	7.71581e-18	5.8419e-17	29.8701
AIM1	-1.44317	6.0388	-11.7688	7.98081e-18	6.03418e-17	29.8362
PTMA	1.15513	10.0158	11.7658	8.0729e-18	6.09958e-17	29.8247
NUPR1	-1.57979	7.82888	-11.7565	8.36234e-18	6.30904e-17	29.7893
CHRDL1	-2.81799	6.87894	-11.7564	8.36743e-18	6.30904e-17	29.7887
SMAP1L	-1.25374	7.93162	-11.7554	8.3984e-18	6.32803e-17	29.785
C20orf7	1.20388	5.27383	11.7494	8.5934e-18	6.4705e-17	29.762
GRASP	-1.1574	6.2529	-11.7446	8.75031e-18	6.58411e-17	29.7438
WIPF1	-1.84072	7.6188	-11.741	8.87262e-18	6.66697e-17	29.7299
SLC25A37	-1.14321	6.97493	-11.7405	8.88865e-18	6.67442e-17	29.7281
C1QC	-2.37024	8.43148	-11.7366	9.02306e-18	6.76606e-17	29.713
RDM1	1.23845	3.76262	11.7362	9.03676e-18	6.77168e-17	29.7115
SLC39A13	-1.09466	7.29788	-11.731	9.21589e-18	6.90119e-17	29.6918
HLA-DPB1	-2.23817	9.71989	-11.7283	9.3138e-18	6.96973e-17	29.6812
FLJ21438	-1.10553	6.06671	-11.7238	9.47397e-18	7.08474e-17	29.6641
NUBPL	1.08405	5.55488	11.7103	9.974e-18	7.45357e-17	29.6124
RAD17	1.0519	5.8542	11.7082	1.00532e-17	7.50254e-17	29.6045
PDE3A	-1.1426	5.41774	-11.7072	1.00937e-17	7.52757e-17	29.6005
ZNF75A	1.25006	5.73762	11.6953	1.05641e-17	7.85159e-17	29.5548
ZNF382	1.73045	4.11381	11.6939	1.06198e-17	7.88767e-17	29.5495
FLJ35880	-1.60219	4.13052	-11.6929	1.06613e-17	7.9131e-17	29.5456
PCSK5	-1.62026	5.96486	-11.6925	1.06748e-17	7.91772e-17	29.5443
SLC25A40	1.54778	4.75206	11.6916	1.07124e-17	7.94024e-17	29.5408
PRPS1	1.51676	7.35118	11.6891	1.08172e-17	8.00705e-17	29.531
WDR89	1.29193	5.57596	11.6869	1.09082e-17	8.05928e-17	29.5226
PUS7	1.32074	4.92498	11.6866	1.09172e-17	8.05928e-17	29.5218
ASPA	-1.2521	3.60216	-11.6854	1.09705e-17	8.08839e-17	29.5169
ZNF322A	1.56665	7.45565	11.6853	1.09714e-17	8.08839e-17	29.5168
ZNF131	1.30664	5.67079	11.6834	1.10534e-17	8.1433e-17	29.5093
FURIN	-1.0256	6.85018	-11.6829	1.10725e-17	8.15188e-17	29.5076
PIGU	1.04038	6.57185	11.675	1.14153e-17	8.39861e-17	29.477
ALAS1	-1.00028	7.78541	-11.6722	1.15359e-17	8.4816e-17	29.4664
C1orf149	1.03663	6.77924	11.6719	1.15497e-17	8.48607e-17	29.4652
URP2	-1.74828	7.36819	-11.6631	1.19453e-17	8.77086e-17	29.4314
VPS37B	-1.08339	7.43769	-11.662	1.19944e-17	8.80097e-17	29.4273
C8orf38	1.24287	5.25435	11.6594	1.21144e-17	8.87709e-17	29.4173
WDR75	1.00232	6.3231	11.6521	1.24575e-17	9.11634e-17	29.3893
HMOX1	-1.51245	6.56169	-11.6477	1.26671e-17	9.25729e-17	29.3725
RAB9B	1.38655	4.7556	11.6344	1.33318e-17	9.71709e-17	29.3212
CSTF2T	1.08443	5.51858	11.634	1.33484e-17	9.72272e-17	29.32
PCDHGA5	-1.16505	7.15786	-11.633	1.34018e-17	9.75509e-17	29.316
FLT1	-1.44159	6.27064	-11.6299	1.35611e-17	9.85795e-17	29.3041
GTPBP8	1.11604	5.37901	11.6273	1.36953e-17	9.94888e-17	29.2942
C9orf167	-1.1365	5.39795	-11.6219	1.39858e-17	1.01464e-16	29.2731
WHSC1L1	1.09682	7.55402	11.6182	1.41816e-17	1.02749e-16	29.2592
WRN	1.39111	5.35358	11.6177	1.42118e-17	1.02899e-16	29.2571
WRB	1.07198	7.56073	11.6095	1.46604e-17	1.06077e-16	29.2259
CLIP4	-1.49837	6.79813	-11.6078	1.47581e-17	1.06642e-16	29.2192
GAS5	1.67203	6.74926	11.5994	1.5241e-17	1.10059e-16	29.1869
PHLDB2	-1.36719	5.91435	-11.5922	1.56656e-17	1.12902e-16	29.1593
CIRH1A	1.11881	7.25877	11.5899	1.58042e-17	1.13751e-16	29.1505
AP3M2	1.1634	6.82994	11.5886	1.58878e-17	1.14257e-16	29.1452
CADPS	2.312	4.58689	11.5884	1.58955e-17	1.14257e-16	29.1447
GKAP1	2.34383	4.2089	11.5664	1.72988e-17	1.24181e-16	29.0598
PPM1M	-1.0065	5.9464	-11.5636	1.74812e-17	1.25408e-16	29.0493
C8orf44	1.07451	4.26334	11.5624	1.75659e-17	1.25933e-16	29.0444
C16orf61	1.43382	6.46879	11.5429	1.89295e-17	1.35354e-16	28.9694
PROK2	-1.60581	6.31038	-11.5395	1.91785e-17	1.37045e-16	28.9563
GABPB2	1.09217	6.3904	11.536	1.94372e-17	1.38802e-16	28.9428
ARL6IP5	-1.16902	8.98073	-11.5352	1.94978e-17	1.39145e-16	28.9397
CDK8	1.30338	6.03015	11.5316	1.97691e-17	1.40989e-16	28.9258
FLJ40869	1.66723	5.48988	11.5306	1.98384e-17	1.41391e-16	28.9223
ZNF507	1.38312	6.06198	11.5293	1.99428e-17	1.42042e-16	28.917
ACP5	-2.75896	8.39494	-11.518	2.08225e-17	1.48211e-16	28.8737
ZNF761	1.22521	5.32819	11.5129	2.12354e-17	1.50979e-16	28.854
SNORD47	2.48732	5.52268	11.5129	2.12389e-17	1.50979e-16	28.8538
SLC16A4	-1.70393	5.46618	-11.5076	2.16772e-17	1.53894e-16	28.8333
UPP1	-1.07643	5.63438	-11.5048	2.19038e-17	1.5535e-16	28.8229
XRN2	1.10985	7.71284	11.5048	2.19107e-17	1.5535e-16	28.8226
PDGFRA	-2.4253	7.18872	-11.4997	2.234e-17	1.58086e-16	28.8031
C6orf130	1.19715	6.4991	11.4869	2.34706e-17	1.65765e-16	28.7536
H6PD	-1.32003	6.26968	-11.483	2.38223e-17	1.6814e-16	28.7386
CASD1	1.47123	6.97115	11.4824	2.38746e-17	1.684e-16	28.7364
XTP3TPA	1.24571	8.19524	11.4807	2.40331e-17	1.6941e-16	28.7298
FLJ39502	-1.50831	4.2892	-11.4746	2.46018e-17	1.73195e-16	28.7063
FAM24B	1.07051	5.06152	11.4722	2.48296e-17	1.74686e-16	28.6971
ORC4L	1.14094	5.98016	11.4719	2.48641e-17	1.74816e-16	28.6957
C2orf21	1.81054	5.12502	11.4682	2.5213e-17	1.77155e-16	28.6817
FAM40B	1.38391	4.44005	11.4542	2.66137e-17	1.86757e-16	28.6275
HK3	-1.47586	6.48326	-11.4519	2.68504e-17	1.88177e-16	28.6186
FAM64A	1.35292	5.10104	11.4482	2.72278e-17	1.90699e-16	28.6046
SLMO2	1.17214	7.45022	11.4447	2.75973e-17	1.93164e-16	28.591
CD151	-1.86342	8.95616	-11.4437	2.77072e-17	1.93808e-16	28.587
HIST1H4L	1.51518	6.11167	11.4434	2.77376e-17	1.93897e-16	28.5859
FAS	-1.5524	6.63762	-11.4392	2.81946e-17	1.9684e-16	28.5695
C10orf88	1.06194	4.94344	11.4326	2.89183e-17	2.01635e-16	28.5441
PREX1	-1.5159	7.163	-11.4315	2.90355e-17	2.02323e-16	28.5401
RABL5	1.10535	6.93349	11.431	2.90922e-17	2.02589e-16	28.5381
OR5P3	-1.05965	4.33009	-11.4256	2.97118e-17	2.0664e-16	28.5169
CH25H	-1.64237	5.40326	-11.4213	3.01989e-17	2.09895e-16	28.5006
ZSCAN16	1.3651	4.37974	11.4204	3.03045e-17	2.10424e-16	28.4971
CHRNA5	2.1674	4.09417	11.4161	3.08103e-17	2.13601e-16	28.4805
ZNF285A	1.33998	2.87088	11.4157	3.0861e-17	2.13817e-16	28.4789
GALNT10	-1.15987	6.50527	-11.4137	3.10962e-17	2.1531e-16	28.4712
FOSB	-3.51438	8.06083	-11.4125	3.12435e-17	2.16056e-16	28.4665
PDLIM1	-1.92413	8.09289	-11.4053	3.21199e-17	2.21976e-16	28.4387
OBFC2A	-1.86982	6.98687	-11.3982	3.30184e-17	2.27754e-16	28.4111
AGBL4	1.12891	3.87391	11.3946	3.34812e-17	2.30656e-16	28.3971
ZFP90	1.07514	5.77071	11.3795	3.54806e-17	2.44121e-16	28.3389
CASK	1.12045	7.1059	11.3719	3.65402e-17	2.51254e-16	28.3094
FLJ20105	1.36401	3.10798	11.3716	3.6579e-17	2.51363e-16	28.3083
WDR35	1.54267	5.562	11.3669	3.7253e-17	2.55721e-16	28.29
C14orf138	1.01121	5.58966	11.3668	3.726e-17	2.55721e-16	28.2898
RETSAT	-1.0823	6.88058	-11.362	3.79532e-17	2.60152e-16	28.2713
GPR4	-1.2252	5.49138	-11.3566	3.87574e-17	2.65314e-16	28.2502
VAV1	-1.29878	5.60135	-11.3565	3.87791e-17	2.65314e-16	28.2497
CD300LF	-1.5537	6.08482	-11.3529	3.93177e-17	2.68663e-16	28.2358
PNPT1	1.33029	6.27196	11.3525	3.93742e-17	2.68881e-16	28.2344
PCDHB11	1.40974	5.23673	11.3521	3.94416e-17	2.69173e-16	28.2327
GVIN1	-1.22652	4.68204	-11.3516	3.95148e-17	2.69504e-16	28.2308
GTF3C3	1.17242	6.38815	11.3474	4.01658e-17	2.73773e-16	28.2144
C1QA	-2.3515	7.58147	-11.3431	4.08318e-17	2.7814e-16	28.1979
CDH13	-1.54555	6.00195	-11.334	4.22967e-17	2.87402e-16	28.1626
GOLPH2	1.68781	6.91557	11.3104	4.63276e-17	3.14011e-16	28.0712
SNORD22	1.52935	5.35888	11.3036	4.75666e-17	3.2201e-16	28.0447
ZNF568	1.01071	4.60882	11.2979	4.86182e-17	3.28721e-16	28.0228
HAT1	1.24109	5.74389	11.2916	4.98103e-17	3.36365e-16	27.9985
C1QB	-2.61259	9.07959	-11.2814	5.18215e-17	3.493e-16	27.9588
ADNP	1.10704	7.58735	11.2755	5.30147e-17	3.56683e-16	27.9359
FCGR2A	-1.37692	5.41721	-11.2718	5.37716e-17	3.61553e-16	27.9217
GPC4	-1.81209	6.47919	-11.2679	5.46002e-17	3.66673e-16	27.9064
PCNXL2	1.19503	5.92766	11.2522	5.80223e-17	3.89177e-16	27.8454
C7orf46	1.424	4.68196	11.2508	5.8334e-17	3.90787e-16	27.84
HIF3A	-1.44448	6.14075	-11.2486	5.88335e-17	3.93893e-16	27.8314
PTPRG	-1.34985	7.00252	-11.2457	5.94877e-17	3.98029e-16	27.8203
HLA-DPB2	-1.45788	7.10944	-11.2312	6.29325e-17	4.20306e-16	27.7639
HLA-DRB1	-2.36528	10.8168	-11.2289	6.34874e-17	4.23753e-16	27.755
SLC44A5	2.7966	4.44783	11.2238	6.47536e-17	4.31941e-16	27.7352
POLD3	1.36092	6.15584	11.217	6.64916e-17	4.42993e-16	27.7087
ZNF681	1.07412	3.11818	11.2115	6.79183e-17	4.52224e-16	27.6874
CES4	-2.04643	8.32375	-11.2029	7.02129e-17	4.66649e-16	27.654
EXOSC5	1.01238	6.39805	11.1979	7.1591e-17	4.75519e-16	27.6345
CITED2	-1.3984	8.22064	-11.1865	7.48267e-17	4.96107e-16	27.5902
PAPOLA	1.13489	8.11768	11.179	7.70309e-17	5.09485e-16	27.561
C1orf67	1.74687	3.37866	11.1772	7.75857e-17	5.12844e-16	27.5538
GPC3	-2.60533	7.58522	-11.174	7.85393e-17	5.1852e-16	27.5416
GTPBP10	1.15479	5.51503	11.1728	7.89051e-17	5.20621e-16	27.5369
CLEC7A	-1.81689	5.39802	-11.1676	8.05265e-17	5.30679e-16	27.5165
PHTF2	1.37947	5.88097	11.1597	8.30237e-17	5.46477e-16	27.4859
POLR3K	1.06279	7.88776	11.1593	8.31751e-17	5.47144e-16	27.484
PIP5K2A	-1.07418	7.62363	-11.1572	8.3837e-17	5.50835e-16	27.4761
RANBP5	1.35416	7.85511	11.1566	8.4054e-17	5.51929e-16	27.4735
PRODH	-1.52165	5.56972	-11.1523	8.54667e-17	5.60532e-16	27.4568
GARS	1.18865	7.56426	11.1396	8.97687e-17	5.87338e-16	27.4075
CCT7	1.00724	8.96827	11.1385	9.01409e-17	5.8942e-16	27.4034
CEBPA	-1.32453	6.23741	-11.1308	9.28958e-17	6.06708e-16	27.3732
SNORD41	1.80316	5.74974	11.1301	9.31447e-17	6.07971e-16	27.3705
FKBP4	1.035	7.23614	11.1262	9.45587e-17	6.16464e-16	27.3553
HSPA12B	-1.08657	6.11968	-11.1253	9.49036e-17	6.18344e-16	27.3517
CD58	-1.08763	6.42408	-11.1203	9.67617e-17	6.30075e-16	27.3322
FAM122B	1.23671	6.39604	11.1177	9.77569e-17	6.36176e-16	27.322
ZNF271	1.27943	4.17815	11.0923	1.07875e-16	6.99522e-16	27.2232
FNDC3B	-1.39294	7.7659	-11.0918	1.08108e-16	7.00617e-16	27.221
C1orf115	-1.01395	7.04221	-11.0824	1.12135e-16	7.26285e-16	27.1843
CD53	-2.34822	8.73123	-11.0675	1.18794e-16	7.68964e-16	27.1264
CCL2	-2.2058	8.03132	-11.0637	1.20589e-16	7.78737e-16	27.1114
FLJ25416	1.01156	4.15539	11.0535	1.25472e-16	8.09315e-16	27.0716
HLA-DRB4	-2.38572	10.7329	-11.0465	1.28941e-16	8.30708e-16	27.0442
ZNF367	1.09814	5.79081	11.0447	1.29852e-16	8.35613e-16	27.0372
C4orf27	1.02191	4.11169	11.0447	1.29855e-16	8.35613e-16	27.0371
PCOLCE	-1.44849	7.50007	-11.0409	1.3175e-16	8.47309e-16	27.0226
GPT2	1.58513	5.51449	11.0388	1.32832e-16	8.53762e-16	27.0144
GPA33	-1.32	5.43971	-11.0372	1.33706e-16	8.58874e-16	27.0078
ZNF616	1.201	5.18633	11.0354	1.34628e-16	8.63784e-16	27.0009
NUP37	1.02427	5.49445	11.0275	1.38825e-16	8.87588e-16	26.9701
AMIGO2	-1.24064	5.74035	-11.0171	1.44559e-16	9.21555e-16	26.9295
ZNF30	1.27874	4.20681	11.0079	1.49876e-16	9.53225e-16	26.8933
CEP192	1.42144	6.40423	11.0073	1.50191e-16	9.54673e-16	26.8912
PCDHB9	1.20853	5.31886	11.0044	1.51922e-16	9.65114e-16	26.8797
SNORD15A	1.62128	4.67996	11.0025	1.53057e-16	9.71764e-16	26.8722
PSTPIP2	-1.05265	5.07059	-11.0014	1.53691e-16	9.75222e-16	26.8681
ZNF256	1.08095	5.29552	10.9931	1.58722e-16	1.00656e-15	26.8358
CIT	1.75956	5.57231	10.9876	1.62172e-16	1.02725e-15	26.8142
ARPC1B	-1.50368	8.70199	-10.9836	1.6475e-16	1.04237e-15	26.7984
ZNF605	1.05424	4.48241	10.9773	1.68849e-16	1.06706e-15	26.7737
PRKCDBP	-1.00836	5.95595	-10.9654	1.76876e-16	1.11697e-15	26.7271
FMO3	-1.50432	5.57038	-10.9625	1.78889e-16	1.12856e-15	26.7158
PLEKHM1	-1.18397	6.0881	-10.9567	1.82957e-16	1.15356e-15	26.6932
SNORA2A	1.18299	3.43863	10.9524	1.86071e-16	1.17117e-15	26.6763
HLA-DRB3	-2.29504	10.6111	-10.9468	1.90215e-16	1.19519e-15	26.6542
FZD4	-1.80121	7.3787	-10.926	2.06244e-16	1.29441e-15	26.573
ALS2CR4	1.17218	5.47974	10.9229	2.08763e-16	1.30797e-15	26.5609
CD83	-1.19158	7.19355	-10.9224	2.09221e-16	1.31009e-15	26.5587
H2AFV	1.09898	9.08889	10.9154	2.1497e-16	1.34455e-15	26.5315
HBS1L	1.00872	6.77313	10.9148	2.15472e-16	1.34691e-15	26.5291
hCG_1998957	-2.33459	10.9144	-10.9141	2.16094e-16	1.35003e-15	26.5262
GPR180	1.24555	5.52603	10.9064	2.22688e-16	1.38964e-15	26.4961
PRAM1	-1.12029	5.91979	-10.9026	2.2606e-16	1.40988e-15	26.481
ARL6IP6	1.77129	6.45366	10.9016	2.26905e-16	1.41434e-15	26.4773
PTPRCAP	-1.49497	7.61882	-10.8966	2.31388e-16	1.44146e-15	26.4576
APOC1	-2.58864	6.82919	-10.8884	2.38919e-16	1.48753e-15	26.4255
NUP88	1.28097	6.16031	10.8807	2.46241e-16	1.53224e-15	26.3952
YWHAQ	1.22627	9.91058	10.8709	2.55839e-16	1.59016e-15	26.3569
ZFP62	1.16257	5.91106	10.8633	2.63573e-16	1.63637e-15	26.327
PLCG2	-1.22558	6.1796	-10.8612	2.65764e-16	1.6481e-15	26.3187
PLAUR	-1.48791	7.4062	-10.86	2.67017e-16	1.65493e-15	26.314
CLU	-2.19858	8.44035	-10.8582	2.68931e-16	1.66585e-15	26.3068
SNORA14B	1.57777	4.49442	10.8556	2.71645e-16	1.68075e-15	26.2968
PCBP3	1.3677	4.95027	10.8472	2.80775e-16	1.73235e-15	26.2636
HLA-DQB1	-2.27035	8.84034	-10.8462	2.81819e-16	1.7378e-15	26.2599
GABRE	-1.39119	5.76891	-10.8442	2.84093e-16	1.74985e-15	26.2518
ARSJ	-1.04395	4.48798	-10.8437	2.84576e-16	1.75184e-15	26.2501
PSMA4	1.15773	8.15643	10.8401	2.88606e-16	1.77565e-15	26.236
PARP4	-1.01215	7.171	-10.8376	2.91502e-16	1.79246e-15	26.226
BCAT1	-1.51923	5.83011	-10.8341	2.95528e-16	1.81517e-15	26.2122
CCNE1	1.68488	4.92534	10.8303	2.99899e-16	1.84099e-15	26.1975
SMEK1	1.00946	6.92451	10.8302	3.00088e-16	1.84111e-15	26.1969
FUSIP1	1.04978	8.81162	10.8275	3.03254e-16	1.85741e-15	26.1864
PEO1	1.08998	4.73947	10.8199	3.12353e-16	1.911e-15	26.1567
ARHGEF10	-1.26959	6.76161	-10.8139	3.19837e-16	1.95569e-15	26.133
CD5L	-1.08511	4.66079	-10.808	3.27304e-16	1.99911e-15	26.1098
CFI	-1.60611	4.7867	-10.8062	3.29702e-16	2.01263e-15	26.1025
ARHGAP24	-1.35156	5.66131	-10.7986	3.396e-16	2.06959e-15	26.0728
CA4	-1.35774	6.12721	-10.7937	3.46138e-16	2.10591e-15	26.0537
C16orf63	1.12034	6.02182	10.7917	3.48946e-16	2.12182e-15	26.0456
ZNF302	1.31551	7.24895	10.7897	3.51717e-16	2.13748e-15	26.0377
RBM8A	1.5262	7.10242	10.7859	3.57006e-16	2.16841e-15	26.0227
SLC7A14	1.34297	4.42047	10.7813	3.6345e-16	2.20388e-15	26.0048
CCL21	-2.557	6.80818	-10.774	3.74048e-16	2.26563e-15	25.9759
CLGN	2.33435	3.4526	10.7697	3.80306e-16	2.30226e-15	25.9593
BTBD11	1.29885	4.5985	10.7482	4.13887e-16	2.50002e-15	25.8744
ZNF229	1.63811	4.33515	10.7448	4.19438e-16	2.53215e-15	25.8611
PAQR3	1.25767	5.28245	10.737	4.32436e-16	2.60486e-15	25.8305
GNG12	-1.41805	6.56296	-10.7276	4.48689e-16	2.69979e-15	25.7934
APITD1	1.03021	4.50666	10.7268	4.50068e-16	2.7066e-15	25.7904
SLC2A3	-1.76955	8.82168	-10.7236	4.55765e-16	2.73785e-15	25.7778
WDR12	1.4243	6.08351	10.7224	4.58029e-16	2.74994e-15	25.7728
ZNF682	1.53267	4.91623	10.7143	4.72782e-16	2.83384e-15	25.741
SLC5A9	-1.21468	5.15409	-10.7135	4.74243e-16	2.83975e-15	25.7379
GABRB3	2.4929	5.49631	10.7043	4.91741e-16	2.93782e-15	25.7016
RMND1	1.28272	5.18666	10.7013	4.97554e-16	2.9693e-15	25.6898
HOM-TES-103	-1.00404	5.83765	-10.7012	4.97825e-16	2.9693e-15	25.6892
PLAGL1	-1.29028	6.37819	-10.6926	5.14982e-16	3.06996e-15	25.6553
SLCO5A1	2.13575	4.7669	10.6888	5.22722e-16	3.1144e-15	25.6403
RIBC2	1.00527	4.40258	10.6824	5.35896e-16	3.18768e-15	25.6153
GIPC1	-1.1142	7.31436	-10.6767	5.48165e-16	3.25888e-15	25.5926
FAM66C	1.34279	6.08897	10.6678	5.67754e-16	3.37167e-15	25.5574
HIST1H3H	2.29729	5.54381	10.6675	5.68416e-16	3.37378e-15	25.5563
FANCF	2.11793	5.1081	10.6622	5.80238e-16	3.44021e-15	25.5356
PHLDA3	-1.13075	6.66876	-10.6517	6.04842e-16	3.5822e-15	25.494
HLA-DRA	-2.18892	10.7657	-10.6475	6.14884e-16	3.6397e-15	25.4775
PSMD14	1.22807	7.56005	10.6437	6.24198e-16	3.69283e-15	25.4624
SMARCE1	1.01937	8.29242	10.6367	6.41551e-16	3.79139e-15	25.4349
RCC2	1.16452	7.85634	10.6277	6.64607e-16	3.92552e-15	25.3995
HIST1H1E	1.69556	9.92301	10.6257	6.7004e-16	3.95548e-15	25.3913
REST	-1.25455	6.80848	-10.6242	6.73967e-16	3.97652e-15	25.3854
OSCAR	-1.24096	6.01156	-10.6221	6.79514e-16	4.00708e-15	25.3772
ETV1	-1.61018	6.2179	-10.6191	6.87745e-16	4.05343e-15	25.3652
C6orf12	1.04471	5.91412	10.6157	6.96803e-16	4.10461e-15	25.352
UNC84B	-1.32525	8.03386	-10.6128	7.049e-16	4.1456e-15	25.3404
CGI-38	-2.1117	7.98772	-10.5968	7.50747e-16	4.40339e-15	25.2773
CEBPG	1.48566	6.82366	10.5954	7.54901e-16	4.42538e-15	25.2717
ADRBK2	-1.07629	6.43503	-10.5933	7.61246e-16	4.46018e-15	25.2633
C7orf38	1.03034	4.17502	10.5906	7.69282e-16	4.50244e-15	25.2528
SIGLEC1	-1.15019	6.23148	-10.5878	7.77998e-16	4.55102e-15	25.2415
PSMA3	1.09104	6.45419	10.5772	8.10959e-16	4.73623e-15	25.1999
H-plk	1.30137	5.2908	10.5671	8.44148e-16	4.92743e-15	25.1597
SMAD3	-1.17448	6.64473	-10.555	8.85233e-16	5.14721e-15	25.112
FMN2	1.2676	4.18346	10.5545	8.87039e-16	5.15303e-15	25.11
USP25	-1.16795	6.60724	-10.5539	8.89062e-16	5.16204e-15	25.1077
SLC1A1	-2.18265	6.42958	-10.5473	9.1267e-16	5.29629e-15	25.0814
CD163	-2.31299	7.70479	-10.5467	9.14658e-16	5.30501e-15	25.0792
GPC5	-1.1178	4.40529	-10.546	9.17244e-16	5.31594e-15	25.0764
ZNF512	1.18474	6.9245	10.5365	9.52293e-16	5.51161e-15	25.0388
SMC1A	1.10398	7.37918	10.535	9.57969e-16	5.54152e-15	25.0329
PLK3	-1.72805	6.89738	-10.5349	9.58512e-16	5.54173e-15	25.0323
WDR70	1.00581	6.22824	10.5326	9.67299e-16	5.58958e-15	25.0231
ZNF638	1.0625	7.15246	10.5317	9.70749e-16	5.60655e-15	25.0196
ATP11C	1.26849	5.75389	10.528	9.85038e-16	5.68007e-15	25.0049
HLA-DMB	-2.19098	8.52336	-10.5159	1.03301e-15	5.95042e-15	24.9572
HN1L	1.09655	7.12342	10.5135	1.04306e-15	6.00513e-15	24.9475
SNORD54	1.97078	4.85438	10.5114	1.05183e-15	6.05243e-15	24.9391
BCL3	-1.10068	6.69115	-10.5063	1.07304e-15	6.16151e-15	24.9191
ZNF193	1.03149	5.56436	10.4973	1.11198e-15	6.37506e-15	24.8834
GAS6	-1.54273	7.81476	-10.4899	1.14509e-15	6.5546e-15	24.854
CALCOCO2	-1.03595	7.94896	-10.478	1.19984e-15	6.85003e-15	24.8071
CD300E	-1.0426	5.94869	-10.4686	1.24566e-15	7.10792e-15	24.7696
BRCC3	1.06475	6.25357	10.4646	1.2654e-15	7.21679e-15	24.7538
PDE4D	-1.34306	6.50753	-10.4606	1.28547e-15	7.31982e-15	24.738
RIOK1	1.20173	5.80101	10.4585	1.29613e-15	7.37282e-15	24.7297
RCN2	1.34014	7.30844	10.4535	1.32196e-15	7.51193e-15	24.71
FAM114A1	-1.12748	6.24755	-10.4504	1.33864e-15	7.59886e-15	24.6974
PIAS2	1.07694	7.54118	10.4436	1.3752e-15	7.79018e-15	24.6704
RAD51L1	1.10357	5.49568	10.4432	1.37735e-15	7.79831e-15	24.6688
APLP1	1.77674	5.87718	10.4404	1.39232e-15	7.87087e-15	24.658
GCNT4	-1.22631	4.38727	-10.4337	1.4299e-15	8.07497e-15	24.6313
ACAT2	1.09367	5.94653	10.4315	1.44253e-15	8.14208e-15	24.6224
PLEKHK1	-1.96362	7.56827	-10.4228	1.49314e-15	8.42336e-15	24.5879
ALDH1A1	-2.25793	8.09459	-10.419	1.51568e-15	8.54174e-15	24.5729
GAB3	-1.12012	5.68788	-10.4174	1.5251e-15	8.5904e-15	24.5666
ZNF680	1.39872	4.77839	10.4017	1.62312e-15	9.10965e-15	24.5042
C12orf45	1.22464	5.04921	10.394	1.67307e-15	9.38517e-15	24.4738
CETN3	1.03206	4.05624	10.3888	1.70846e-15	9.57388e-15	24.4528
GTF2A1	1.13584	7.14088	10.3804	1.76623e-15	9.88237e-15	24.4195
PTPN13	-2.01475	6.65779	-10.3774	1.78747e-15	9.99609e-15	24.4075
ZNF706	1.09269	6.7211	10.3584	1.92714e-15	1.07497e-14	24.3321
FAM129B	-1.67766	8.24697	-10.3433	2.04581e-15	1.13884e-14	24.2722
ALG8	1.08197	5.8175	10.3348	2.11642e-15	1.17755e-14	24.2382
SNORD7	1.24641	3.7441	10.3316	2.14294e-15	1.1917e-14	24.2257
AIF1	-1.82048	6.97821	-10.3239	2.20995e-15	1.22771e-14	24.1948
CDC25A	1.47395	4.24405	10.3073	2.35999e-15	1.3051e-14	24.129
ZNF660	1.08661	3.68044	10.3061	2.37136e-15	1.31072e-14	24.1242
HSPA14	1.10187	4.47713	10.3043	2.38859e-15	1.31958e-14	24.1169
GPD1	-1.6142	5.95463	-10.3021	2.40965e-15	1.32987e-14	24.1081
CCDC23	1.32234	4.35299	10.2998	2.43151e-15	1.34058e-14	24.099
SNORA18	1.201	6.83401	10.2935	2.49323e-15	1.37391e-14	24.0739
FPRL1	-2.45532	5.14525	-10.2913	2.5156e-15	1.38555e-14	24.065
FSD1	1.12433	5.28729	10.2909	2.51947e-15	1.38698e-14	24.0634
CASP6	1.06849	5.75676	10.2785	2.64679e-15	1.45122e-14	24.014
PPP2R5B	-1.12864	6.91828	-10.2674	2.76559e-15	1.51484e-14	23.97
PLEKHF1	-1.05137	5.96668	-10.2627	2.81818e-15	1.54287e-14	23.9511
HIST1H2AM	1.15619	4.38954	10.2585	2.86503e-15	1.5677e-14	23.9346
CCR1	-1.5106	4.82829	-10.2556	2.89886e-15	1.58308e-14	23.9228
CFH	-2.36978	6.683	-10.2519	2.94166e-15	1.60485e-14	23.9081
CD69	-2.54785	6.71992	-10.2415	3.0654e-15	1.66902e-14	23.8668
AMN1	1.32924	6.00671	10.2349	3.14758e-15	1.71292e-14	23.8403
C6orf66	1.06883	5.94755	10.2334	3.16656e-15	1.72153e-14	23.8343
PIN4	1.04026	5.40876	10.2317	3.18807e-15	1.73236e-14	23.8275
SLC43A3	-1.10903	7.77736	-10.225	3.27411e-15	1.77605e-14	23.8008
RAP2B	-1.05939	7.2998	-10.2208	3.32865e-15	1.80248e-14	23.7843
B4GALT6	1.08534	4.03456	10.2167	3.38298e-15	1.82919e-14	23.768
VDR	-1.07525	5.4018	-10.216	3.39363e-15	1.83313e-14	23.7649
ZNF347	1.3236	4.55092	10.2106	3.46713e-15	1.87006e-14	23.7434
SNORD84	1.01877	6.00218	10.2007	3.60591e-15	1.94219e-14	23.7041
ANXA2	-1.26855	9.94261	-10.2007	3.60618e-15	1.94219e-14	23.704
SLC6A14	-2.99567	6.20055	-10.1985	3.63715e-15	1.9579e-14	23.6954
CDC2L6	1.01147	6.87645	10.1906	3.75415e-15	2.01989e-14	23.6637
ARHGAP18	-1.63226	6.76323	-10.1834	3.86353e-15	2.07772e-14	23.6349
GIMAP4	-1.77823	6.2733	-10.1817	3.88938e-15	2.08853e-14	23.6282
OAS2	-1.40587	6.10806	-10.1753	3.99026e-15	2.1385e-14	23.6026
NY-SAR-48	1.00494	5.16237	10.1721	4.04094e-15	2.16354e-14	23.5899
EVI2B	-2.55178	6.67675	-10.1692	4.08853e-15	2.18581e-14	23.5782
RBM34	1.17185	5.54568	10.1657	4.1461e-15	2.21551e-14	23.5642
RBM4B	1.11833	7.49	10.1645	4.16529e-15	2.22468e-14	23.5595
BAG3	-1.02643	6.67077	-10.1624	4.19971e-15	2.24087e-14	23.5513
ZNF718	1.17193	4.15653	10.1537	4.3479e-15	2.31655e-14	23.5165
PCDHB3	2.11311	4.37142	10.1533	4.3564e-15	2.31995e-14	23.5146
AZIN1	1.17448	8.44318	10.1488	4.43422e-15	2.35565e-14	23.4968
HIST1H2BE	1.55859	6.78278	10.1459	4.48541e-15	2.38169e-14	23.4853
GNL3	1.16923	6.35941	10.1378	4.63396e-15	2.4546e-14	23.4527
PRMT3	1.07801	5.03823	10.1213	4.94814e-15	2.60839e-14	23.3869
ZBTB33	1.23844	6.33774	10.1207	4.95964e-15	2.61257e-14	23.3846
HFE	-1.14092	4.87409	-10.115	5.075e-15	2.67012e-14	23.3616
HIST1H3J	1.92869	4.64232	10.1134	5.10691e-15	2.68561e-14	23.3553
C8orf34	-1.05908	4.07105	-10.0965	5.46201e-15	2.86821e-14	23.2879
ZNF639	1.09657	4.56912	10.0964	5.46618e-15	2.86902e-14	23.2871
REPS1	1.09435	6.49543	10.0913	5.57675e-15	2.92425e-14	23.2671
C1R	-1.75991	8.49302	-10.0851	5.71803e-15	2.99689e-14	23.242
FOLR2	-1.2541	6.92104	-10.0849	5.72151e-15	2.99728e-14	23.2414
WDR62	1.01435	5.56345	10.0846	5.72783e-15	2.99915e-14	23.2403
CD81	-1.44275	10.3905	-10.0798	5.83915e-15	3.0543e-14	23.221
SIRPA	-1.51025	7.12056	-10.0785	5.87056e-15	3.06801e-14	23.2156
C10orf83	1.20841	5.40572	10.0759	5.93019e-15	3.09622e-14	23.2055
ARHGEF1	-1.02414	7.53318	-10.0703	6.06485e-15	3.162e-14	23.183
ATP6V1D	1.14845	6.76875	10.0661	6.16684e-15	3.21364e-14	23.1663
C14orf174	1.23446	4.25018	10.0586	6.35536e-15	3.30715e-14	23.1361
ZC3H12A	-1.31131	6.60845	-10.0583	6.36416e-15	3.31007e-14	23.1347
EXTL2	1.22586	5.0392	10.0581	6.36703e-15	3.31007e-14	23.1343
PILRA	-1.21742	6.39664	-10.0572	6.3905e-15	3.32069e-14	23.1306
HNRPA3	1.05206	7.28994	10.0567	6.40328e-15	3.32575e-14	23.1286
SLC6A6	-1.34164	7.569	-10.0497	6.58608e-15	3.41745e-14	23.1004
PGBD5	1.2389	4.53669	10.0409	6.82219e-15	3.53828e-14	23.0651
C2orf3	1.03089	4.38829	10.0388	6.87985e-15	3.56312e-14	23.0566
ACTL6B	1.42416	5.6755	10.037	6.92943e-15	3.5854e-14	23.0495
RNF138	1.21079	5.95929	10.0275	7.19529e-15	3.71768e-14	23.0117
PCDHB12	1.2486	4.99167	10.0267	7.21928e-15	3.72831e-14	23.0084
SNORA56	1.41335	4.14389	10.0257	7.24914e-15	3.74197e-14	23.0043
ACADM	1.05523	7.43331	10.0225	7.34243e-15	3.78476e-14	22.9914
SNORD36B	1.68092	4.38584	10.0044	7.89411e-15	4.0653e-14	22.9189
F2RL3	-1.13703	6.17528	-9.99313	8.25691e-15	4.24813e-14	22.8738
RABGGTB	1.09207	6.76307	9.99301	8.26093e-15	4.2482e-14	22.8733
C12orf56	1.72866	3.33673	9.97004	9.0563e-15	4.63976e-14	22.7812
C6orf145	-1.52244	6.85411	-9.9423	1.01201e-14	5.17751e-14	22.67
EXOD1	1.11853	4.31332	9.93528	1.04084e-14	5.31255e-14	22.6418
C7orf36	1.426	5.81609	9.9272	1.07511e-14	5.47979e-14	22.6094
ARTS-1	-1.32589	7.32076	-9.91662	1.12166e-14	5.70642e-14	22.5669
CCDC76	1.17358	5.46568	9.90898	1.15655e-14	5.87571e-14	22.5362
PARP14	-1.58434	7.85616	-9.90822	1.16005e-14	5.88805e-14	22.5332
FNBP1L	1.55919	7.10666	9.90097	1.19428e-14	6.05614e-14	22.504
CDKL1	-1.10084	4.21263	-9.89653	1.21572e-14	6.15915e-14	22.4862
C1orf97	1.10166	4.21771	9.89237	1.23615e-14	6.25975e-14	22.4695
PDLIM5	-1.03915	7.24337	-9.85239	1.45121e-14	7.2981e-14	22.3088
CCNA1	1.56516	3.83627	9.84869	1.47292e-14	7.4005e-14	22.294
PLXNA2	-1.32351	6.95369	-9.84397	1.50109e-14	7.53163e-14	22.275
GPR120	-1.80259	5.3762	-9.8406	1.52148e-14	7.62694e-14	22.2615
P2RY13	-1.3953	5.17196	-9.83706	1.54329e-14	7.72919e-14	22.2472
HIST1H1B	2.5948	5.23016	9.82733	1.60479e-14	8.01149e-14	22.2081
AYTL1	-1.22387	6.14396	-9.81633	1.67726e-14	8.34282e-14	22.1638
HIST2H2AC	1.38477	9.26156	9.81349	1.69649e-14	8.42696e-14	22.1524
SMC6	1.41945	5.64792	9.80623	1.74667e-14	8.6644e-14	22.1232
C13orf7	1.43346	6.07582	9.80126	1.78193e-14	8.83129e-14	22.1032
PREI3	1.0865	6.04651	9.7984	1.8025e-14	8.9292e-14	22.0917
HLA-E	-2.04673	9.86958	-9.79609	1.81928e-14	9.00414e-14	22.0824
AACS	1.02225	6.20163	9.77022	2.01865e-14	9.96385e-14	21.9782
EYA2	2.48275	5.67065	9.76872	2.03081e-14	1.0017e-13	21.9722
ANKRD44	-1.11112	7.09746	-9.76867	2.03125e-14	1.0017e-13	21.972
PMAIP1	2.04879	4.5077	9.7565	2.13316e-14	1.05101e-13	21.923
CENTB1	-1.16619	5.93888	-9.75168	2.17483e-14	1.07009e-13	21.9036
SLC5A3	1.10878	7.34429	9.72496	2.42166e-14	1.18394e-13	21.7959
CLSTN2	1.16388	5.70771	9.72488	2.42246e-14	1.18394e-13	21.7956
A2BP1	1.0196	4.31049	9.72158	2.45486e-14	1.1987e-13	21.7823
CEACAM6	-2.74859	8.40526	-9.71445	2.52624e-14	1.23191e-13	21.7536
PIK3AP1	-1.1698	6.75284	-9.71367	2.53423e-14	1.23525e-13	21.7504
PDLIM3	-1.63084	6.28107	-9.69627	2.71814e-14	1.32195e-13	21.6802
SNORD61	1.76466	4.80656	9.6948	2.73422e-14	1.32913e-13	21.6743
PCOLCE2	-1.5529	5.76463	-9.69207	2.76441e-14	1.34262e-13	21.6633
GRN	-1.81565	10.4207	-9.69197	2.76555e-14	1.34262e-13	21.6629
PYGL	-1.28415	6.48602	-9.68831	2.80668e-14	1.36198e-13	21.6481
C9orf39	1.17886	4.58193	9.67878	2.91642e-14	1.41273e-13	21.6097
HLA-DPA1	-1.98503	10.4238	-9.66995	3.02208e-14	1.46197e-13	21.5741
RANBP6	1.09467	6.46942	9.64942	3.28258e-14	1.58518e-13	21.4913
ACOT9	-1.13443	7.01992	-9.64783	3.30378e-14	1.59471e-13	21.4848
C10orf58	1.50983	7.58019	9.62683	3.59564e-14	1.73101e-13	21.4001
PPFIBP1	-1.4478	6.5849	-9.62523	3.61878e-14	1.74098e-13	21.3936
CD3E	-1.40416	5.64781	-9.60421	3.93906e-14	1.88802e-13	21.3087
hCG_1986447	1.28761	5.25263	9.59778	4.04246e-14	1.93503e-13	21.2828
GEMIN6	1.0155	5.13727	9.59003	4.17084e-14	1.99126e-13	21.2515
GRINA	-1.0524	6.93376	-9.58353	4.28168e-14	2.04328e-13	21.2252
C13orf18	-1.06608	5.15901	-9.55579	4.789e-14	2.27842e-13	21.1131
SMYD3	1.31977	6.17505	9.55541	4.79627e-14	2.28089e-13	21.1116
PCDHB14	1.47158	6.08273	9.54853	4.93151e-14	2.34316e-13	21.0837
AKR1C1	-1.48769	5.35227	-9.53602	5.18704e-14	2.45923e-13	21.0331
ANKRD26	1.11865	4.19109	9.5327	5.25708e-14	2.49097e-13	21.0197
FTL	-1.02955	11.4296	-9.52584	5.40483e-14	2.55805e-13	20.9919
HES6	1.99952	6.64322	9.52338	5.45883e-14	2.58026e-13	20.982
HSBP1	1.05514	7.44151	9.52237	5.481e-14	2.5885e-13	20.9779
SLC25A13	1.16032	6.52698	9.5218	5.49371e-14	2.59338e-13	20.9756
RHEB	1.08161	6.24038	9.51623	5.61874e-14	2.64897e-13	20.9531
SLC16A3	-1.33395	7.62709	-9.51607	5.6223e-14	2.64951e-13	20.9524
GUSBL2	1.05632	6.41642	9.50978	5.76699e-14	2.71652e-13	20.927
CHI3L2	-2.03982	5.14661	-9.5012	5.97054e-14	2.80877e-13	20.8923
hCG_1815491	1.30751	5.3471	9.48806	6.29622e-14	2.9569e-13	20.8391
FILIP1L	-1.29114	5.36346	-9.48776	6.30377e-14	2.95917e-13	20.8379
PTPRC	-2.06296	6.47248	-9.48232	6.44415e-14	3.02377e-13	20.8159
FAM49A	-1.3237	6.66436	-9.48138	6.46857e-14	3.03393e-13	20.8121
ZEB2	-1.77821	7.94387	-9.47841	6.54678e-14	3.06798e-13	20.8
SNORD36C	1.27404	6.43269	9.47183	6.72332e-14	3.14936e-13	20.7734
OSGEPL1	1.13286	4.43808	9.46839	6.81743e-14	3.19208e-13	20.7595
ASRGL1	1.63682	7.39701	9.46571	6.89165e-14	3.22545e-13	20.7486
GPRIN3	-1.26684	6.98444	-9.44832	7.39409e-14	3.44879e-13	20.6782
ZYG11A	1.19534	3.47039	9.44327	7.5466e-14	3.51692e-13	20.6577
RNF213	-1.1905	8.18399	-9.43006	7.96091e-14	3.70368e-13	20.6042
UNC93B1	-1.31847	6.8604	-9.42992	7.96536e-14	3.70418e-13	20.6037
SH3GL2	1.83305	4.93215	9.42928	7.98621e-14	3.7123e-13	20.6011
SNORA23	1.16654	6.74523	9.4199	8.2952e-14	3.85265e-13	20.5631
GPRASP2	1.33463	5.0123	9.41169	8.57532e-14	3.98106e-13	20.5298
CCDC126	1.00568	5.83268	9.41016	8.62889e-14	4.00423e-13	20.5236
ZNF480	1.38895	4.80584	9.37704	9.8673e-14	4.56342e-13	20.3893
CCDC58	1.1677	5.1236	9.37668	9.88153e-14	4.56807e-13	20.3879
GYG1	-1.03089	7.51668	-9.37203	1.00697e-13	4.64913e-13	20.369
PAK3	1.4563	4.6332	9.35564	1.07611e-13	4.96207e-13	20.3025
HIST1H2BH	1.50271	5.74609	9.35203	1.09195e-13	5.03088e-13	20.2879
HAVCR2	-1.55367	6.52102	-9.34979	1.10191e-13	5.07037e-13	20.2788
PLK2	-1.31084	6.27737	-9.33482	1.17083e-13	5.36942e-13	20.2181
GABRQ	1.02962	3.74659	9.33281	1.1804e-13	5.40877e-13	20.21
C1S	-2.00679	8.7584	-9.31439	1.27198e-13	5.80648e-13	20.1352
RAB3B	2.28288	4.70176	9.30807	1.30498e-13	5.94968e-13	20.1095
ZNF266	1.04347	6.09816	9.2998	1.34951e-13	6.14502e-13	20.076
ZNF562	1.00598	5.41288	9.29469	1.37776e-13	6.2632e-13	20.0552
PHKA1	1.11133	4.53361	9.28696	1.42167e-13	6.4521e-13	20.0238
CBWD2	1.64971	4.57156	9.27237	1.50834e-13	6.83977e-13	19.9646
C18orf54	1.22746	3.64523	9.2708	1.51799e-13	6.88069e-13	19.9582
RNF2	1.06753	5.46412	9.26498	1.55425e-13	7.04212e-13	19.9346
FCGR3A	-1.53695	6.41829	-9.25434	1.62289e-13	7.33485e-13	19.8913
CAPG	-1.72325	8.07873	-9.25421	1.62372e-13	7.33558e-13	19.8908
HIST2H2BF	2.08974	4.052	9.24883	1.65959e-13	7.49453e-13	19.869
PPIC	-1.33585	7.20954	-9.24533	1.68335e-13	7.59872e-13	19.8547
SNORD57	1.34466	10.1894	9.24011	1.7194e-13	7.75822e-13	19.8335
PCMTD2	1.15468	8.14483	9.23346	1.76642e-13	7.95725e-13	19.8065
ZNF10	1.12485	4.69597	9.23188	1.77778e-13	8.00514e-13	19.8001
CD14	-1.66413	8.08899	-9.22666	1.81592e-13	8.16341e-13	19.7789
C15orf41	1.76308	5.3622	9.22529	1.82605e-13	8.20559e-13	19.7733
ANAPC10	1.03627	4.42402	9.21777	1.88268e-13	8.44966e-13	19.7427
FUT8	1.02676	6.61679	9.21435	1.90901e-13	8.56078e-13	19.7288
RAB39B	1.23285	4.483	9.21231	1.92487e-13	8.62836e-13	19.7206
ANXA4	-1.39528	8.13607	-9.20272	2.00135e-13	8.9565e-13	19.6816
ARHGAP25	-1.25242	6.26157	-9.19724	2.04644e-13	9.15083e-13	19.6593
SNORD117	1.47997	4.4337	9.18317	2.16679e-13	9.66917e-13	19.6021
SNORA21	1.34174	3.95757	9.17895	2.20427e-13	9.8284e-13	19.5849
XAF1	-1.64725	7.17315	-9.17802	2.21262e-13	9.84959e-13	19.5812
ADAL	1.00107	4.52	9.16926	2.29281e-13	1.01983e-12	19.5455
SMARCA1	1.21905	7.0672	9.16782	2.30634e-13	1.02542e-12	19.5396
PLXNB2	-1.26538	8.40938	-9.16609	2.32258e-13	1.03223e-12	19.5326
PIK3CG	-1.50023	6.15597	-9.15951	2.38555e-13	1.05935e-12	19.5059
hCG_22804	1.32122	9.08366	9.1546	2.43367e-13	1.07984e-12	19.4859
SLC4A8	1.66378	5.21837	9.1477	2.5029e-13	1.10921e-12	19.4578
PLAC8	-2.1084	6.84346	-9.14363	2.54462e-13	1.12724e-12	19.4413
RNASEN	1.14008	6.3367	9.1419	2.56262e-13	1.13476e-12	19.4342
GUCY1B3	-1.07876	6.30464	-9.12602	2.73367e-13	1.2061e-12	19.3696
FLJ31033	-1.39604	5.8573	-9.10113	3.0249e-13	1.3312e-12	19.2683
ZNF510	1.08435	5.1765	9.09609	3.0876e-13	1.35678e-12	19.2478
CD24	2.72266	6.77068	9.09165	3.14389e-13	1.38041e-12	19.2297
ABCC9	-1.42269	5.90347	-9.08459	3.23554e-13	1.4178e-12	19.2009
C2orf15	1.34283	3.51105	9.08257	3.26232e-13	1.42839e-12	19.1927
hCG_1787519	1.3849	7.04613	9.07743	3.33124e-13	1.4574e-12	19.1718
ATIC	1.0466	6.99009	9.07117	3.41723e-13	1.49204e-12	19.1463
ZNF254	1.3951	6.88227	9.05529	3.64551e-13	1.58727e-12	19.0816
ATCAY	1.49487	4.5527	9.05461	3.65559e-13	1.58976e-12	19.0788
RGS4	1.87021	5.22867	9.05211	3.69303e-13	1.6054e-12	19.0686
GPX1	-1.13474	8.8808	-9.04678	3.77397e-13	1.63928e-12	19.047
FGFR2	-1.47151	6.46122	-9.04103	3.86345e-13	1.67682e-12	19.0235
PCLO	1.84628	4.57428	9.04079	3.86727e-13	1.67781e-12	19.0225
PUS3	1.02817	4.26688	9.03956	3.8866e-13	1.68553e-12	19.0175
UTP14A	1.08799	5.15551	9.03723	3.92378e-13	1.70098e-12	19.008
XPR1	1.12427	7.6388	9.03152	4.01597e-13	1.74025e-12	18.9848
RHBDF1	-1.01284	6.33274	-9.02847	4.06628e-13	1.75927e-12	18.9723
ACSL4	-1.06818	6.99502	-9.02205	4.17399e-13	1.8023e-12	18.9462
VNN2	-1.6627	4.90348	-9.01681	4.26401e-13	1.83754e-12	18.9248
RARRES3	-1.72049	6.14639	-9.01642	4.27089e-13	1.83978e-12	18.9232
CMTM3	-1.0324	7.28919	-9.0111	4.36436e-13	1.87783e-12	18.9016
ATP1A3	1.50368	5.24067	9.01095	4.36704e-13	1.87824e-12	18.901
PRSS23	-1.00591	6.23166	-9.00808	4.41851e-13	1.89664e-12	18.8892
EYA1	2.3338	4.49386	9.00354	4.50097e-13	1.93053e-12	18.8707
CAPN13	-1.12544	5.26259	-9.00295	4.51175e-13	1.93363e-12	18.8683
PLEK	-1.81114	6.27714	-9.0012	4.54414e-13	1.94599e-12	18.8612
ZIC2	1.10001	6.43122	9.00101	4.54755e-13	1.94669e-12	18.8604
C1orf103	1.30646	4.80028	8.99849	4.59463e-13	1.96607e-12	18.8501
ANGPTL1	-1.33399	3.79637	-8.96693	5.2254e-13	2.22384e-12	18.7215
ZNF770	1.1979	6.3204	8.96692	5.22552e-13	2.22384e-12	18.7214
GALNAC4S-6ST	-1.38086	7.11483	-8.96569	5.25183e-13	2.23417e-12	18.7164
ARRDC4	-1.26113	7.06529	-8.96215	5.32818e-13	2.26225e-12	18.702
F13A1	-1.84936	7.73075	-8.95558	5.47278e-13	2.32274e-12	18.6752
ZNF443	1.04458	3.36669	8.95328	5.52436e-13	2.34066e-12	18.6658
CCDC109B	1.0295	6.33129	8.94921	5.61692e-13	2.37838e-12	18.6492
FASN	-1.13951	7.66988	-8.92745	6.13821e-13	2.5841e-12	18.5604
ZFAND1	1.20813	6.8175	8.92262	6.2603e-13	2.63347e-12	18.5407
FBXO16	1.31893	3.87999	8.89077	7.12906e-13	2.98514e-12	18.4108
GSTM1L	-1.55381	5.76939	-8.88877	7.18751e-13	3.00731e-12	18.4026
CMKLR1	-1.28758	5.9447	-8.88793	7.21241e-13	3.01658e-12	18.3992
AOAH	-1.84076	6.46442	-8.86825	7.81558e-13	3.26012e-12	18.3189
ZCD1	1.16712	5.71132	8.86439	7.93979e-13	3.31067e-12	18.3031
PHACTR1	-1.00242	6.02842	-8.86161	8.03041e-13	3.34335e-12	18.2917
PLA2G2A	-1.43113	5.36339	-8.8585	8.13293e-13	3.38217e-12	18.2791
FOS	-2.61847	9.83086	-8.8559	8.21964e-13	3.41693e-12	18.2684
WWC1	-1.00186	6.28895	-8.8451	8.59033e-13	3.5602e-12	18.2243
RNF122	-1.18934	6.71669	-8.84272	8.67437e-13	3.59367e-12	18.2146
CAMK1D	1.41594	6.87905	8.83897	8.80824e-13	3.64775e-12	18.1993
AASS	-1.20501	6.99686	-8.83734	8.86703e-13	3.66931e-12	18.1926
C11orf71	1.31026	5.44123	8.8317	9.07352e-13	3.7505e-12	18.1696
GM2A	-1.48999	8.46715	-8.83085	9.10527e-13	3.76078e-12	18.1661
C18orf55	1.05313	4.87565	8.82487	9.33028e-13	3.8479e-12	18.1417
NTRK2	-1.36737	5.1559	-8.82208	9.43738e-13	3.89061e-12	18.1303
PSCDBP	-2.01693	6.78887	-8.81982	9.52464e-13	3.92362e-12	18.1211
ZEB1	-1.03555	6.04176	-8.81067	9.88742e-13	4.06847e-12	18.0837
ARHGAP15	-1.1414	5.18398	-8.80897	9.95651e-13	4.09536e-12	18.0768
RHOB	-1.41559	9.24404	-8.80207	1.02412e-12	4.2077e-12	18.0486
SLC38A5	-1.10036	6.12315	-8.79107	1.07122e-12	4.39625e-12	18.0036
GRM2	1.07895	4.43752	8.78462	1.09979e-12	4.50507e-12	17.9773
RAB8B	-1.1172	6.70811	-8.78191	1.11206e-12	4.55191e-12	17.9662
RANBP3L	-1.03801	3.62586	-8.77666	1.13618e-12	4.64368e-12	17.9448
SNORD73A	1.42931	4.71421	8.76664	1.18367e-12	4.82575e-12	17.9038
ACVR2B	1.16122	5.71935	8.76145	1.20904e-12	4.92672e-12	17.8826
CCL5	-1.41603	6.86808	-8.76039	1.21432e-12	4.94642e-12	17.8783
BTG2	-1.25905	8.36468	-8.75564	1.23814e-12	5.03967e-12	17.8589
ACSS1	-1.02319	6.62155	-8.75354	1.24878e-12	5.07731e-12	17.8503
GSTK1	-1.24448	8.17669	-8.74903	1.27204e-12	5.16614e-12	17.8319
GGTA1	-1.01868	4.49356	-8.74842	1.2752e-12	5.17704e-12	17.8294
RAB3C	1.43442	3.46171	8.71763	1.4463e-12	5.84345e-12	17.7035
CD48	-2.03138	7.27054	-8.7121	1.47939e-12	5.97273e-12	17.6809
C4B	-1.13219	7.76652	-8.70214	1.54092e-12	6.21198e-12	17.6402
PRRG1	-1.19084	4.60244	-8.69989	1.55513e-12	6.26465e-12	17.631
SLC2A14	-1.22791	5.85229	-8.69361	1.59562e-12	6.42302e-12	17.6053
CAB39L	-1.21357	4.82723	-8.67648	1.71147e-12	6.86912e-12	17.5352
CMAH	-1.79592	6.54242	-8.6751	1.72112e-12	6.90534e-12	17.5296
FLJ21963	-1.33674	6.27766	-8.66989	1.75825e-12	7.04654e-12	17.5083
ALOX15	-1.32152	5.17852	-8.66687	1.78008e-12	7.12881e-12	17.496
CLEC12A	-1.4855	4.22459	-8.6662	1.78502e-12	7.14595e-12	17.4932
ZNF177	1.00406	5.55681	8.6603	1.82864e-12	7.31792e-12	17.4691
ARSA	-1.02662	6.5195	-8.65854	1.84181e-12	7.36791e-12	17.4619
HOXD10	2.20098	4.53755	8.6474	1.92774e-12	7.70041e-12	17.4163
PCID2	1.16251	6.29655	8.62434	2.11859e-12	8.44423e-12	17.322
C1orf51	1.24827	4.68701	8.6221	2.13807e-12	8.51878e-12	17.3128
FLJ20920	-1.28905	6.03908	-8.62197	2.13922e-12	8.52024e-12	17.3123
hCG_2004593	1.15494	7.7776	8.62146	2.14374e-12	8.53516e-12	17.3102
HOXA5	-1.48755	6.54351	-8.61973	2.159e-12	8.59151e-12	17.3031
PON2	-1.21983	8.41151	-8.61967	2.15947e-12	8.59151e-12	17.3029
CCDC90B	1.1599	5.26204	8.61086	2.23878e-12	8.8941e-12	17.2668
F8	-1.54064	5.87794	-8.61055	2.24161e-12	8.9021e-12	17.2656
SLC2A1	1.23178	7.40317	8.60967	2.24976e-12	8.92799e-12	17.2619
C6orf105	-1.46608	4.95999	-8.59598	2.37947e-12	9.42906e-12	17.2059
FAM103A1	1.20496	3.52211	8.5909	2.42948e-12	9.61677e-12	17.1851
GGTLA1	-1.09535	6.85635	-8.5709	2.63689e-12	1.04114e-11	17.1033
SNORA4	1.35295	6.48307	8.56971	2.64979e-12	1.04586e-11	17.0984
C6orf168	1.45677	5.32852	8.56917	2.65563e-12	1.04778e-11	17.0962
POR	-1.08669	7.76481	-8.56676	2.68193e-12	1.05739e-11	17.0863
HIST1H2BG	1.92474	5.9921	8.56185	2.73646e-12	1.07773e-11	17.0662
CD274	-1.61061	4.93245	-8.55347	2.83202e-12	1.11296e-11	17.0319
CHGB	2.53372	4.48861	8.53711	3.02841e-12	1.18587e-11	16.9649
BTN3A3	-1.29424	6.97668	-8.53462	3.05938e-12	1.19712e-11	16.9548
HIST1H3G	2.90679	6.19048	8.52609	3.16821e-12	1.23796e-11	16.9198
PCDHB6	1.26002	3.70132	8.52151	3.22823e-12	1.26051e-11	16.9011
FGL2	-1.87274	7.16032	-8.51914	3.25982e-12	1.27194e-11	16.8914
PAPD1	1.16362	5.91673	8.51264	3.34772e-12	1.30483e-11	16.8648
CCL18	-2.83427	8.76435	-8.50821	3.40915e-12	1.32783e-11	16.8466
SHFM1	1.16685	9.2021	8.50768	3.41649e-12	1.33022e-11	16.8445
GTF2A2	1.22551	4.91615	8.49818	3.55219e-12	1.38158e-11	16.8056
HRH2	-1.0617	4.79649	-8.49708	3.56814e-12	1.38679e-11	16.8011
HP	-2.24164	5.00465	-8.49506	3.59784e-12	1.39685e-11	16.7928
HGF	-1.18522	5.28463	-8.48931	3.68374e-12	1.42817e-11	16.7692
NUDCD2	1.09378	4.7163	8.48209	3.79427e-12	1.46998e-11	16.7397
HIST1H2AH	1.33755	3.44128	8.45525	4.23571e-12	1.63233e-11	16.6297
HDGFRP3	1.16269	7.23477	8.43191	4.66118e-12	1.78872e-11	16.5341
PKIB	1.89393	3.98245	8.42939	4.70959e-12	1.80666e-11	16.5238
SNAI2	-1.12522	6.62283	-8.4253	4.78924e-12	1.83529e-11	16.5071
CCDC17	-1.01586	5.72723	-8.42113	4.8718e-12	1.86562e-11	16.49
SNORA75	1.253	5.89369	8.40868	5.12702e-12	1.95787e-11	16.439
GLIPR1	-1.39816	6.75889	-8.39489	5.4254e-12	2.06604e-11	16.3825
HMP19	1.39597	4.04421	8.37892	5.79289e-12	2.20061e-11	16.317
HIST1H2BF	1.52491	7.83836	8.37342	5.92504e-12	2.24925e-11	16.2945
CHGA	1.37936	5.05997	8.34749	6.59013e-12	2.48791e-11	16.1882
SNORD18A	1.53931	4.09235	8.3456	6.64145e-12	2.50642e-11	16.1805
CHD7	1.79775	6.42244	8.34173	6.74784e-12	2.54481e-11	16.1646
ZNF585A	1.11634	4.58749	8.3412	6.76245e-12	2.54856e-11	16.1625
USP41	1.62329	5.10988	8.32339	7.27523e-12	2.73308e-11	16.0895
BYSL	1.00686	5.79614	8.29801	8.07398e-12	3.01994e-11	15.9855
ZNF780A	1.18992	4.28847	8.28821	8.40535e-12	3.13959e-11	15.9453
SMPD3	1.17438	5.23482	8.28305	8.58539e-12	3.20465e-11	15.9241
ABCA6	-1.71224	5.37575	-8.28228	8.61261e-12	3.21371e-11	15.921
ADAMTS18	1.09803	3.80783	8.26833	9.12022e-12	3.39848e-11	15.8638
BZW2	1.07143	6.20082	8.26809	9.12914e-12	3.39949e-11	15.8628
ARNTL2	1.54583	4.01162	8.26405	9.28199e-12	3.4517e-11	15.8462
ZNF43	1.20301	4.01576	8.26036	9.42366e-12	3.50081e-11	15.8311
APOL6	-1.32851	6.50088	-8.2553	9.62153e-12	3.57189e-11	15.8104
CHIA	-1.07678	4.99103	-8.25185	9.75872e-12	3.62036e-11	15.7962
ATRNL1	1.42533	3.29483	8.23815	1.03233e-11	3.81815e-11	15.7401
HIST1H3D	2.4535	5.98844	8.21581	1.13151e-11	4.17508e-11	15.6485
CLIC2	-1.20479	5.46833	-8.20552	1.18038e-11	4.34663e-11	15.6063
CD109	-1.30334	5.36695	-8.19146	1.25052e-11	4.591e-11	15.5487
BCL6	-1.49695	7.33786	-8.18742	1.27143e-11	4.66462e-11	15.5321
ZNF91	1.26364	5.93532	8.18606	1.27859e-11	4.68773e-11	15.5265
ARID5B	-1.28346	7.30534	-8.18381	1.29042e-11	4.72795e-11	15.5173
ZNF528	1.07983	5.17729	8.18218	1.29913e-11	4.75508e-11	15.5106
PCDHB13	1.24507	4.18026	8.17597	1.33267e-11	4.87293e-11	15.4852
ZNF117	1.16278	6.74386	8.17495	1.33826e-11	4.89174e-11	15.481
RENBP	-1.02544	6.22398	-8.16967	1.36764e-11	4.98914e-11	15.4593
EXOC5	1.06465	7.12735	8.16686	1.38348e-11	5.04187e-11	15.4478
GRAMD2	-1.10514	6.07027	-8.16081	1.41828e-11	5.16526e-11	15.423
ABCA5	1.91665	5.10277	8.15396	1.45879e-11	5.30569e-11	15.3949
C3AR1	-1.62082	6.52212	-8.14109	1.53795e-11	5.58619e-11	15.3422
FLJ12993	1.55827	6.311	8.13675	1.56564e-11	5.6792e-11	15.3244
PIK3R1	-1.4269	7.4272	-8.11585	1.706e-11	6.16584e-11	15.2387
SLC37A2	-1.19494	5.72488	-8.11089	1.74117e-11	6.28671e-11	15.2183
HIST1H2BM	2.32911	6.95824	8.10501	1.7837e-11	6.42754e-11	15.1942
HNRPH3	1.36251	8.151	8.0916	1.88478e-11	6.77352e-11	15.1392
CD226	-1.07033	4.82749	-8.08666	1.92341e-11	6.90144e-11	15.119
ZNF483	1.08573	5.02659	8.05532	2.18772e-11	7.81644e-11	14.9905
SLC7A8	-1.23415	6.80797	-8.03576	2.37086e-11	8.44046e-11	14.9103
FADS1	1.25981	7.34769	8.03421	2.38601e-11	8.48333e-11	14.9039
F3	-1.50274	6.61059	-8.03144	2.4133e-11	8.57477e-11	14.8926
SNORD38B	1.65182	3.70427	8.02943	2.43332e-11	8.64029e-11	14.8843
SNHG3	1.16319	5.70609	8.02833	2.44438e-11	8.67677e-11	14.8798
CD86	-1.29831	5.19199	-8.02133	2.51567e-11	8.90667e-11	14.8511
SLFN5	-1.04757	6.01337	-8.01087	2.62618e-11	9.28589e-11	14.8082
HLA-F	-1.64261	8.90995	-8.00532	2.68675e-11	9.49394e-11	14.7855
GPR125	1.05485	5.57033	7.99726	2.77729e-11	9.8107e-11	14.7524
GBP2	-1.26419	6.12272	-7.98814	2.88334e-11	1.01689e-10	14.715
GRK5	-1.51743	7.19997	-7.9856	2.91359e-11	1.02656e-10	14.7046
PARP8	-1.47399	6.46882	-7.97897	2.99413e-11	1.0546e-10	14.6774
SH3BGRL	-1.12002	8.70918	-7.9755	3.03717e-11	1.06907e-10	14.6632
ACTA2	-1.56269	9.73962	-7.96167	3.21472e-11	1.12866e-10	14.6065
PRKG1	-1.31689	5.33317	-7.95655	3.28316e-11	1.14974e-10	14.5855
C8orf59	1.11882	4.33774	7.9419	3.48691e-11	1.21797e-10	14.5254
SLC7A2	-1.49981	6.04116	-7.93585	3.57465e-11	1.24662e-10	14.5007
ZFP30	1.41419	4.8096	7.92716	3.70471e-11	1.29033e-10	14.465
SNORD4B	1.27329	5.70295	7.91917	3.82834e-11	1.33212e-10	14.4323
ZNF334	1.33273	4.73912	7.91447	3.90299e-11	1.3568e-10	14.413
PDCD1LG2	-1.45792	5.35485	-7.90828	4.00364e-11	1.39135e-10	14.3876
PPARGC1A	-1.02481	4.729	-7.90601	4.04117e-11	1.40216e-10	14.3783
HIST1H1D	1.22642	6.21996	7.90259	4.09827e-11	1.42062e-10	14.3643
C6orf199	1.26194	5.00112	7.90051	4.13348e-11	1.43147e-10	14.3558
hCG_1778643	-1.04873	7.64379	-7.89778	4.18017e-11	1.44672e-10	14.3446
ADCY1	1.36917	5.66996	7.89213	4.27835e-11	1.47929e-10	14.3214
RANBP9	1.00515	7.43466	7.86826	4.7194e-11	1.62562e-10	14.2236
SNORD45A	1.21882	5.94959	7.86402	4.8025e-11	1.6532e-10	14.2062
SNORA66	1.22944	3.5637	7.8638	4.80678e-11	1.65416e-10	14.2053
HIST1H4D	2.05014	4.88063	7.84705	5.14938e-11	1.76539e-10	14.1366
PAMCI	-1.10275	4.03393	-7.84643	5.1624e-11	1.7693e-10	14.1341
HAS2	-2.12464	5.4979	-7.84016	5.29719e-11	1.81322e-10	14.1084
FCGRT	-1.33213	8.29303	-7.83663	5.37472e-11	1.8386e-10	14.0939
SLC25A33	1.16728	4.6874	7.81506	5.87288e-11	2.00338e-10	14.0056
PIP5K1B	-1.33353	6.00834	-7.79685	6.32942e-11	2.15374e-10	13.9309
C2orf27	1.12286	3.43154	7.77942	6.79937e-11	2.30862e-10	13.8595
CDH8	2.05291	3.69875	7.77855	6.82398e-11	2.31626e-10	13.8559
CMTM7	-1.21411	7.35753	-7.76967	7.07743e-11	2.39633e-10	13.8196
RELN	2.45229	5.05466	7.76406	7.24262e-11	2.44923e-10	13.7966
GPR158	1.40479	3.62628	7.7536	7.56078e-11	2.54972e-10	13.7537
H2BFXP	1.81201	3.8905	7.74931	7.69524e-11	2.59267e-10	13.7361
ZDHHC22	1.61712	4.20854	7.74399	7.86528e-11	2.64751e-10	13.7144
B4GALT1	-1.23874	8.30308	-7.74121	7.95563e-11	2.67628e-10	13.703
BST2	-1.64054	7.48623	-7.72707	8.43191e-11	2.83127e-10	13.645
FYB	-1.58902	5.86361	-7.71976	8.68907e-11	2.91404e-10	13.6151
PLSCR4	-1.57356	6.88008	-7.68431	1.00515e-10	3.34834e-10	13.4699
GPRC5B	1.55209	7.20068	7.68238	1.01317e-10	3.3723e-10	13.462
FZD5	-1.06751	6.52518	-7.63681	1.22181e-10	4.0381e-10	13.2754
PCP4	1.53032	4.48331	7.63381	1.23697e-10	4.08203e-10	13.2631
PPID	1.00632	5.88789	7.61621	1.32972e-10	4.37753e-10	13.1911
CA8	1.93857	4.97696	7.58094	1.53702e-10	5.02521e-10	13.0467
OR1D4	-1.07676	4.59054	-7.57128	1.59921e-10	5.21759e-10	13.0072
OR1D5	-1.07676	4.59054	-7.57128	1.59921e-10	5.21759e-10	13.0072
GJA7	1.17614	6.28846	7.55836	1.68637e-10	5.49378e-10	12.9544
ETS2	-1.19117	8.69668	-7.54591	1.77486e-10	5.76831e-10	12.9034
CCL13	-1.08544	4.68213	-7.54007	1.81796e-10	5.90485e-10	12.8795
PBEF1	-1.03679	7.29835	-7.52362	1.94499e-10	6.3081e-10	12.8123
RAPGEF5	-1.00144	7.00342	-7.51997	1.97434e-10	6.39378e-10	12.7973
CALB1	2.0719	3.69383	7.49969	2.14581e-10	6.92107e-10	12.7144
PVRL3	-1.14401	5.651	-7.48641	2.26603e-10	7.28876e-10	12.6601
FGD4	-1.16798	6.25415	-7.47833	2.34253e-10	7.52598e-10	12.627
AKAP12	-1.41498	7.09696	-7.47448	2.37978e-10	7.63666e-10	12.6113
CD2	-1.28305	5.92344	-7.44398	2.69725e-10	8.6049e-10	12.4867
ZNF415	1.03713	4.50915	7.42558	2.90878e-10	9.25543e-10	12.4115
RBP1	1.53151	7.15801	7.42373	2.93092e-10	9.32319e-10	12.4039
HLA-C	-1.3373	9.54029	-7.38754	3.40012e-10	1.07128e-09	12.2561
C19orf30	1.37039	4.34227	7.36972	3.65813e-10	1.14564e-09	12.1833
FGF7	-1.17118	4.93173	-7.35877	3.82615e-10	1.19518e-09	12.1386
OCLN	-1.34812	6.89064	-7.3575	3.84605e-10	1.20105e-09	12.1334
C20orf85	-1.88024	6.26967	-7.33371	4.24026e-10	1.32152e-09	12.0363
PEG10	2.43491	7.40659	7.32548	4.38579e-10	1.36531e-09	12.0028
SNORA68	1.66093	6.77283	7.32419	4.40905e-10	1.37216e-09	11.9975
AHI1	1.05504	6.00292	7.30437	4.78241e-10	1.48371e-09	11.9166
CACNA1D	-1.03491	5.9832	-7.29831	4.90262e-10	1.51885e-09	11.8919
FKBP5	-1.56266	7.47559	-7.28532	5.17085e-10	1.59833e-09	11.8389
PLEKHG1	-1.27376	5.77923	-7.28167	5.24863e-10	1.62191e-09	11.824
B3GALT5	1.19858	3.58304	7.26667	5.58149e-10	1.72088e-09	11.7629
FADS2	1.21497	7.57678	7.26293	5.66771e-10	1.74599e-09	11.7476
CFHR1	-1.13487	4.53404	-7.26124	5.70702e-10	1.75711e-09	11.7407
UQCRFS1	1.40374	3.33935	7.25324	5.8972e-10	1.81464e-09	11.7081
GBP1	-1.57799	7.05257	-7.25037	5.96716e-10	1.83513e-09	11.6964
CDO1	-1.32712	5.38618	-7.24376	6.13094e-10	1.88444e-09	11.6695
ZNF793	1.04666	4.46678	7.23809	6.27494e-10	1.92653e-09	11.6464
SNORA40	1.22584	6.52427	7.23447	6.36871e-10	1.95313e-09	11.6316
GBP3	-1.30551	5.36323	-7.22933	6.50425e-10	1.9919e-09	11.6107
GSTM5	-1.71488	5.53562	-7.21559	6.88086e-10	2.10135e-09	11.5547
FAM130A2	1.27786	4.9925	7.20281	7.25071e-10	2.20629e-09	11.5026
CCND2	-1.72442	7.67792	-7.19137	7.59829e-10	2.30628e-09	11.456
P2RX7	-1.09346	5.58202	-7.19036	7.62995e-10	2.31524e-09	11.4519
RND1	-1.75338	5.67884	-7.16753	8.37726e-10	2.53497e-09	11.359
CCND1	-1.80331	7.5711	-7.16695	8.39716e-10	2.54029e-09	11.3566
C6orf32	-1.25717	6.18818	-7.16674	8.40447e-10	2.5418e-09	11.3557
RALGPS2	1.31567	5.45911	7.16102	8.60376e-10	2.5992e-09	11.3324
SNORD58B	1.28365	7.56595	7.15813	8.70621e-10	2.62797e-09	11.3207
GTF2H5	1.16273	4.16622	7.14792	9.07765e-10	2.73723e-09	11.2791
GK	-1.19831	7.56659	-7.13241	9.67233e-10	2.90755e-09	11.216
SLC5A12	1.04008	3.55179	7.12996	9.76971e-10	2.93521e-09	11.2061
GREM1	1.06346	5.33398	7.12975	9.77837e-10	2.937e-09	11.2052
HIST1H2AE	1.88495	5.67781	7.1074	1.07145e-09	3.20409e-09	11.1143
[truncated: 191 more rows]
